# Supplementary material
Source: publisher figshare collection journal article supplement (https://acs.figshare.com/ndownloader/files/16775843)
Supplement: Supplementary file 1 [file 16775843]

## **Supporting Information for:**

### **Systematic Investigations of Ligand Steric Effects on $\alpha$ -Diimine Nickel Catalyzed Olefin Polymerization and Copolymerization**

Yanfeng Gong,<sup>a,b</sup> Shuaikang Li<sup>b</sup> Qi Gong<sup>b</sup> Shaojie Zhang<sup>b,\*</sup>, Binyuan Liu<sup>a,\*</sup>, Shengyu Dai<sup>b,\*</sup>

<sup>a</sup> *National-Local Joint Engineering Laboratory for Energy Conservation of Chemical Process Integration and Resources Utilization, School of Chemical Engineering and Technology, Hebei University of Technology, No 8 Guangrong Road, 300130 Tianjin, China.*

<sup>b</sup> *Institutes of Physical Science and Information Technology, School of Computer Science and Technology, Anhui University, Hefei, Anhui, 230601, China*

## **Table of Contents**

- 1. Figures, Tables.**
- 2. Experimental Sections**
  - 2.1 General Considerations.**
  - 2.2 Procedure for the Synthesis of Benzhyldrol.**
  - 2.3 Procedure for the Synthesis of Anilines.**
  - 2.4 Procedure for the Synthesis of Ligands L1-L5.**
  - 2.5 Procedure for the Synthesis of Complexes 1-5.**
  - 2.6 General *in-Situ*-Activated Polymerization Procedure.**
  - 2.7 Copolymerization of Ethylene and UA.**
- 3. Spectra Data**
  - 3.1 <sup>1</sup>H and <sup>13</sup>C NMR of the Synthetic Compounds.**
  - 3.2 ESI-MS of Ligand L1-L4.**
  - 3.3 MALDI-TOF of Complexes 1-4.**
  - 3.4 <sup>1</sup>H and <sup>13</sup>C NMR of polymer and copolymer.**
  - 3.5 DSC, GPC of polymer and copolymer.**
- 4. References.**
- 5. X-ray Crystallography.**

## 1. Figures, Tables.

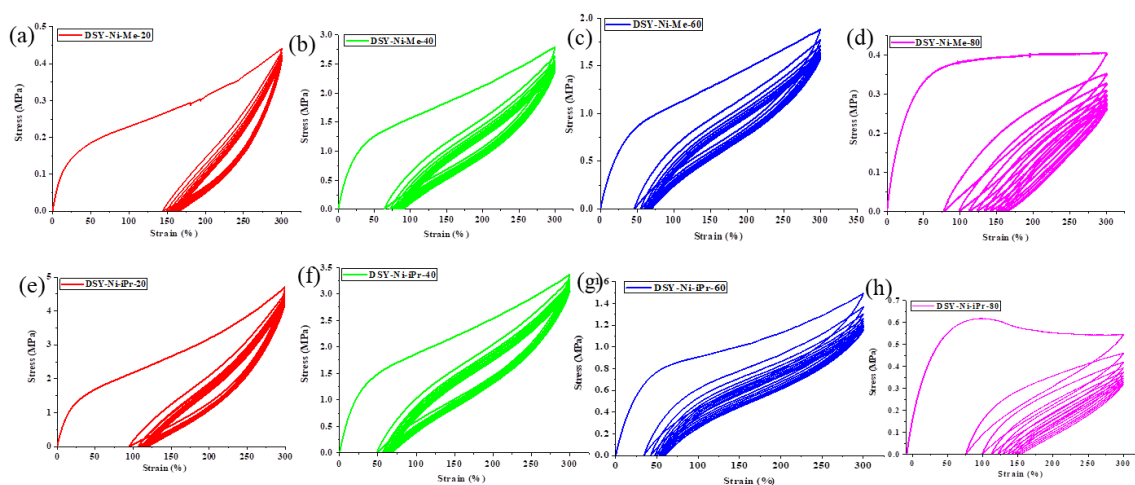

**Figure S1.** Plots of hysteresis experiments of ten cycles at a strain of 300% for samples generated by **2** at 20°C (a), 40 °C (b), 60 °C (c), 80 °C (d); **3** at 20°C (e), 40 °C (f), 60 °C (g), 80 °C (h).

**Table S1. Mechanical properties.<sup>a</sup>**

| Ent. | Precat.  | T/°C | Strain at break (%) | Stress at break (MPa) | SR (%) <sup>b</sup> |
|------|----------|------|---------------------|-----------------------|---------------------|
| 1    | <b>2</b> | 20   | 325                 | 4.9                   | 45                  |
| 2    | <b>2</b> | 40   | 529                 | 6.0                   | 63                  |
| 3    | <b>2</b> | 60   | 826                 | 5.5                   | 77                  |
| 4    | <b>2</b> | 80   | 1558                | 0.3                   | 45                  |
| 5    | <b>3</b> | 20   | 443                 | 7.6                   | 60                  |
| 6    | <b>3</b> | 40   | 567                 | 9.6                   | 77                  |
| 7    | <b>3</b> | 60   | 526                 | 2.1                   | 80                  |
| 8    | <b>3</b> | 80   | 1078                | 0.5                   | 49                  |
| 9    | <b>4</b> | 20   | 329                 | 20.3                  | - <sup>c</sup>      |
| 10   | <b>4</b> | 40   | 439                 | 13.6                  | -                   |
| 11   | <b>4</b> | 60   | 408                 | 8.3                   | 46                  |
| 12   | <b>4</b> | 80   | 613                 | 13.6                  | -                   |
| 13   | <b>5</b> | 20   | 208                 | 7.8                   | -                   |
| 14   | <b>5</b> | 40   | 361                 | 12.3                  | -                   |
| 15   | <b>5</b> | 60   | 484                 | 20.0                  | 22                  |
| 16   | <b>5</b> | 80   | 628                 | 22.1                  | -                   |

<sup>a</sup>Conditions: Performed at 10 mm/min by means of a Universal Test Machine (UTM2502) at room temperature. <sup>b</sup>The strain recovery values (SR) can be calculated by  $SR = 100(\epsilon_a - \epsilon_r)/\epsilon_a$ , where  $\epsilon_a$  is the applied strain and  $\epsilon_r$  is the strain in the cycle at zero load after 10th cycle. <sup>c</sup>Not determined.

**Table S2. Effect of Catalyst on Ethylene Polymerization in Short Time.<sup>a</sup>**

| Ent. | Precat.  | T/°C | Yield/g |
|------|----------|------|---------|
| 1    | <b>1</b> | 20   | 3.03    |
| 2    | <b>2</b> | 20   | 2.01    |
| 3    | <b>3</b> | 20   | 1.51    |
| 4    | <b>4</b> | 20   | 1.32    |
| 5    | <b>5</b> | 20   | 0.38    |

<sup>a</sup>General conditions: Ni = 1.0  $\mu$ mol, Al/Ni = 600, CH<sub>2</sub>Cl<sub>2</sub> = 2 ml, toluene = 40 ml, ethylene = 8 atm, time = 10 min.

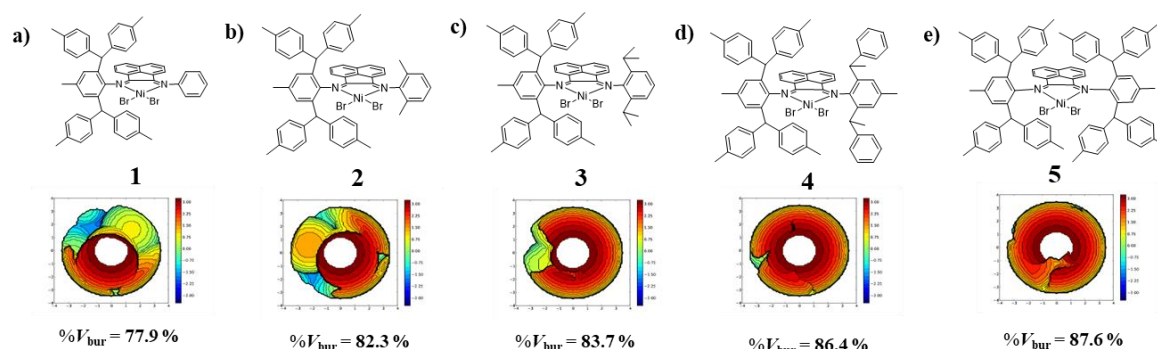**Figure S2. Steric maps for the complexes 1-5: a) 1; b) 2; c) 3; d) 4; e) 5.**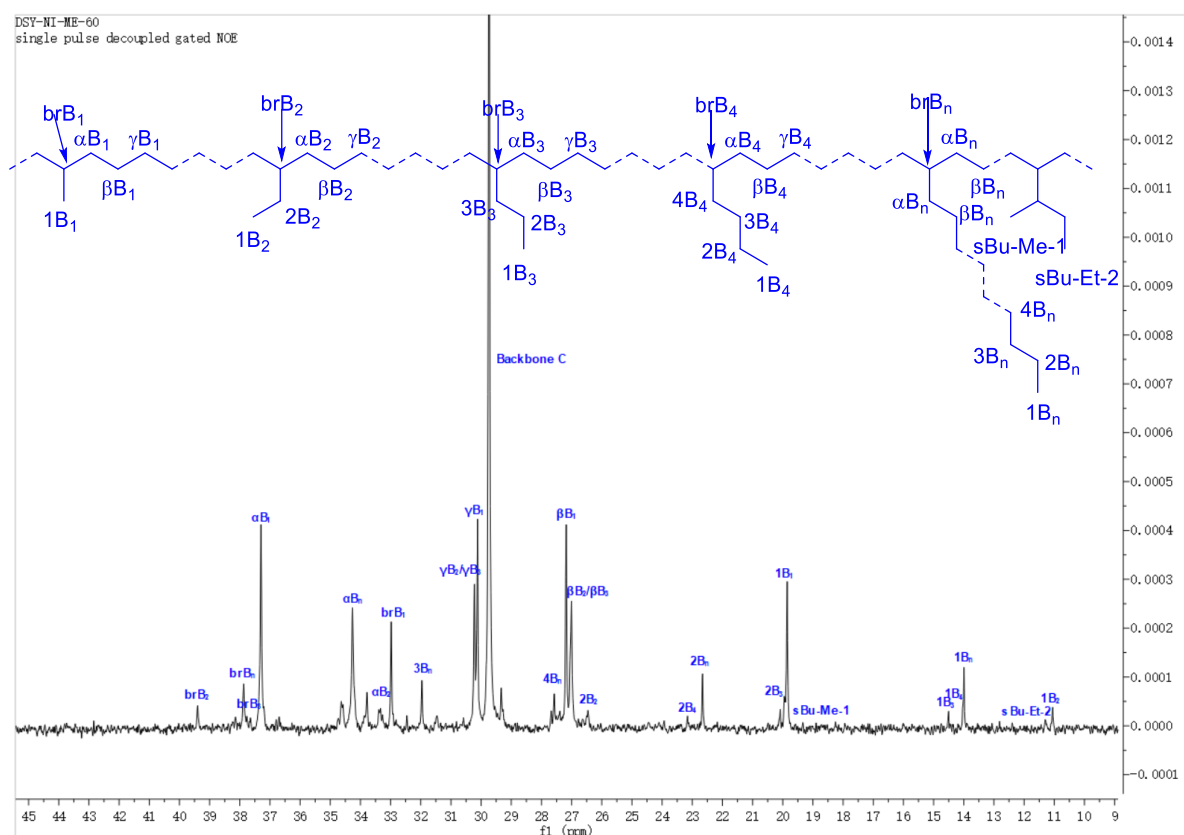**Figure S3. <sup>13</sup>C NMR spectrum of the polymer from table 1, entry 7 (CDCl<sub>2</sub>/CDCl<sub>2</sub>, 110 °C).**

## 2. Experimental sections

### 2.1 General Considerations

All experiments were carried out under a dry Nitrogen atmosphere using standard Schlenk techniques or in a glove-box. Deuterated solvents used for NMR were dried and distilled prior to use.  $^1\text{H}$ ,  $^{13}\text{C}$  NMR spectra were recorded by a Bruker Ascend Tm 500 spectrometer at ambient temperature unless otherwise stated. The chemical shifts of the  $^1\text{H}$  and  $^{13}\text{C}$  NMR spectra were referenced to the residual solvent; Coupling constants are in Hz. Elemental analysis was performed by the Analytical Center of the University of Science and Technology of China. X-ray Diffraction data were collected at 298(2) K on a Bruker Smart CCD area detector with graphite-monochromated Mo  $\text{K}^\alpha$  radiation ( $\lambda = 0.71073 \text{ \AA}$ ). Molecular weight and molecular weight distribution of the polymers were determined by gel permeation chromatography (GPC) with a PL 210 equipped with one Shodex AT-803S and two Shodex AT-806MS columns at 150 °C using trichlorobenzene as a solvent and calibrated with polystyrene standards.

Stress/strain experiments were performed at 10 mm/min by means of a Universal Test Machine (UTM2502) at room temperature. At least three specimens of each polymer were tested. Polymers were melt-pressed at 30 to 35°C above their melting point to obtain the test specimens. The test specimens had 14-mm gauge length, 2-mm width, and thickness of 0.5 mm.

### 2.2 Procedure for the Synthesis of Benzhyldrol.

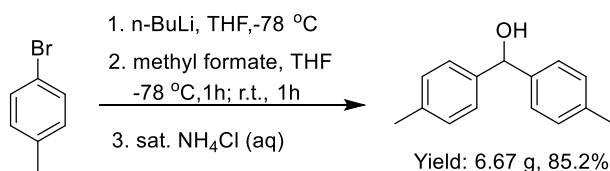

**Bis(3-methylphenyl)methanol.** 4-methylbromobenzene (12.6 g, 73.8 mmol, 1.0 equiv.) was dissolved in dry THF (75 mL) and cooled to -78 °C under  $\text{N}_2$ . *n*-Butyl lithium (46.2 mL, 1.6 M solution in hexane, 73.9 mmol, 1.0 equiv.) was added dropwise and the resulting suspension was stirred at -78 °C for 1 h. Methyl formate (2.22 g, 36.9 mmol, 0.5 equiv.) in THF (15 mL) was then added dropwise over a period of 10 min, and the mixture was stirred at -78 °C for 1 h, then at room temperature for 1 h. Saturated ammonium chloride (aqueous, 100 mL) was added and the mixture was extracted with  $\text{Et}_2\text{O}$  (3×30 mL). The combined organic layers were

washed with brine (2×30 mL), dried over anhydrous Na<sub>2</sub>SO<sub>4</sub>, and concentrated *in vacuo*. The crude product was purified by recrystallization to give a colorless solid (6.67 g, 85.2% yield). <sup>1</sup>H NMR (500 MHz, CDCl<sub>3</sub>) δ 7.22 (d, *J* = 8.0 Hz, 4H, aryl-*H*), 7.11 (d, *J* = 8.0 Hz, 4H, aryl-*H*), 5.72 (s, 1H, CH(PhMe)<sub>2</sub>), 2.31 (s, 6H, Ar-CH<sub>3</sub>) 2.28 (broad peak, 1H, OH). <sup>13</sup>C NMR (126 MHz, CDCl<sub>3</sub>) δ 141.21, 136.85, 129.02, 126.49, 75.69 (CH(PhMe)<sub>2</sub>), 21.09 (Ar-CH<sub>3</sub>).

### 2.3 Procedure for the Synthesis of Aniline.

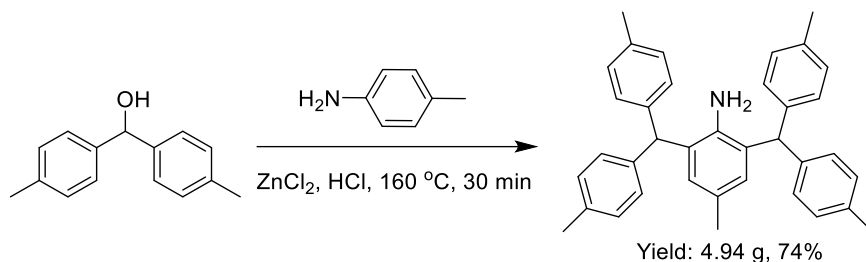

**2,6-Bis(di-*p*-tolylmethyl)-4-methylaniline.** A mixture of *p*-toluidine (1.44 g, 13.5 mmol, 1.0 equiv.) and bis(*p*-methylphenyl)methanol (5.71 g, 27.0 mmol, 2.0 equiv.) was heated to 120 °C. A solution of anhydrous zinc chloride (0.92 g, 6.8 mmol, 0.5 equiv.) in concentrated hydrochloric acid (1.13 mL, 37% in H<sub>2</sub>O, 1.0 equiv.) was added to the mixture (exothermic + intense bubbling), and the temperature was raised to 160 °C. After 30 min at 160 °C, the reaction mixture was cooled to room temperature and dissolved in CH<sub>2</sub>Cl<sub>2</sub> (200 mL). The CH<sub>2</sub>Cl<sub>2</sub> layer was washed with water (3 × 100 mL) and dried over anhydrous magnesium sulfate. The solution was concentrated to 20 mL. The product was crashed out with 200 mL methanol and washed with methanol (3 × 100 mL). The desired aniline was obtained as a white crystalline solid at 74.0 % (4.94 g) yield. <sup>1</sup>H NMR (500 MHz, CDCl<sub>3</sub>) δ 7.07 (d, *J* = 7.9 Hz, 8H, aryl-*H*), 6.96 (d, *J* = 8.0 Hz, 8H, aryl-*H*), 6.38 (s, 2H, aryl-*H*), 5.36 (s, 2H, CH(PhMe)<sub>2</sub>), 2.31 (s, 12H, CH(PhMe)<sub>2</sub>), 2.02 (s, 3H, Ar-CH<sub>3</sub>). <sup>13</sup>C NMR (126 MHz, CDCl<sub>3</sub>) δ 140.12, 139.73, 136.06, 129.59, 129.48, 129.38, 128.94, 126.62, 51.76 (CH(PhMe)<sub>2</sub>), 21.20 (CH(PhMe)<sub>2</sub>), 21.16 (Ar-CH<sub>3</sub>). This compound is known.<sup>1</sup>

**2,6-bis-(*sec*-phenethyl)-4-methylaniline** were synthesized according to the literature.<sup>2</sup>

### 2.4 Procedure for the Synthesis Ligands L1-L5.

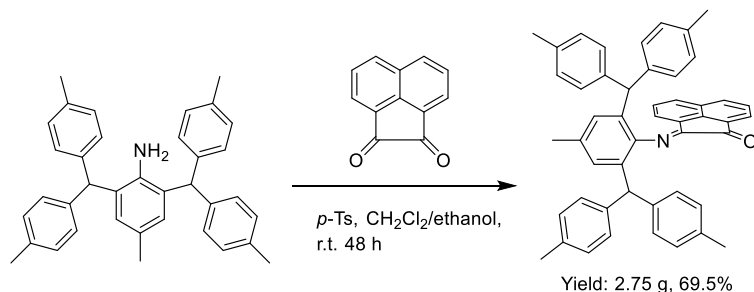

**2-((2,6-bis(di-*p*-tolylmethyl)-4-methylphenyl)imino)acenaphthylene-1-one.** A mixture of 2,6-bis(di-*p*-tolylmethyl)-4-methylaniline (2.97 g, 6 mmol, 1.0 equiv.) and acenaphthylene-1,2-dione (1.09 g, 6 mmol, 1.0 equiv.) were dissolved in 5 mL ethanol and 100 mL of CH<sub>2</sub>Cl<sub>2</sub> containing a catalytic amount of *p*-toluenesulfonic acid and stirred for 48 h at room temperature.

The solvent was evaporated at reduced pressure to give the crude product, which was chromatographed on silica gel with petroleum ether-ethyl acetate (v/v = 30:1). A 2.75 g amount of the product was obtained as red powder in 69.5% yield.  $^1\text{H}$  NMR (500 MHz,  $\text{CDCl}_3$ )  $\delta$  8.02 (dd,  $J$  = 10.8, 7.6 Hz, 2H, aryl- $H$ ), 7.76-7.66 (m, 2H, aryl- $H$ ), 7.06-6.99 (m, 5H, aryl- $H$ ), 6.96 (t,  $J$  = 9.4 Hz, 4H, aryl- $H$ ), 6.77 (s, 2H, aryl- $H$ ), 6.71 (d,  $J$  = 7.9 Hz, 4H, aryl- $H$ ), 6.32 (d,  $J$  = 7.8 Hz, 4H, aryl- $H$ ), 6.03 (d,  $J$  = 7.1 Hz, 1H, aryl- $H$ ), 5.33 (s, 2H,  $\text{CH}(\text{PhMe})_2$ ), 2.29 (s, 6H,  $\text{CH}(\text{PhMe})_2$ ), 2.25 (s, 3H,  $\text{Ar-CH}_3$ ), 1.67 (s, 6H,  $\text{CH}(\text{PhMe})_2$ ).  $^{13}\text{C}$  NMR (126 MHz,  $\text{CDCl}_3$ )  $\delta$  190.09 ( $\text{C=O}$ ), 162.56 ( $\text{C=N}$ ), 146.08, 142.38, 140.19, 139.12, 135.60, 134.86, 133.14, 132.77, 131.98, 131.67, 130.24, 129.97, 129.76, 129.47, 129.42, 129.31, 128.93, 128.64, 128.60, 128.43, 127.58, 127.56, 127.33, 126.86, 124.29, 122.22, 121.50, 51.53, 21.65 ( $\text{Ar-CH}_3$ ), 21.19 ( $\text{CH}(\text{PhMe})_2$ ), 20.48 ( $\text{CH}(\text{PhMe})_2$ ). This compound is kwon.<sup>1</sup>

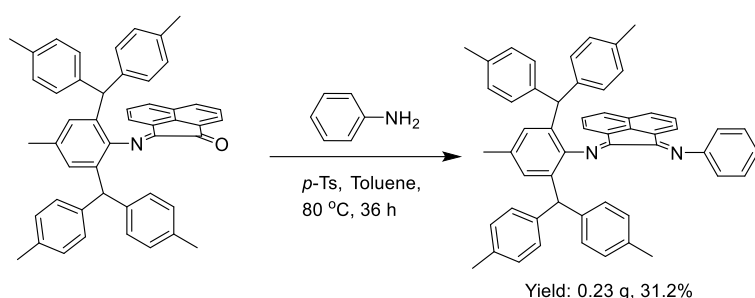

**Acenaphthylene-1-[2,6-bis(di-*p*-tolylmethyl)-4-methylphenylimino]-2-phenylimine (L1).** A solution of 2-((2,6-bis(di-*p*-tolylmethyl)-4-methylphenyl)imino)acenaphthylene-1-one (0.66 g, 1 mmol, 1.0 equiv.), aniline (0.19 g, 2 mmol, 2.0 equiv.) and *p*-toluenesulfonic acid (10 mg) in toluene (30 mL) was stirred at 80 °C for 36 h, until there was one main point on the TLC plate. The desired compound was isolated using column chromatography on silica gel with petroleum ether-ethyl acetate (v/v = 40:1). The pure compound was obtained as a yellow solid (31.2%, 0.23 g).  $^1\text{H}$  NMR (500 MHz,  $\text{CDCl}_3$ )  $\delta$  7.72 (d,  $J$  = 8.2 Hz, 1H, aryl- $H$ ), 7.61 (d,  $J$  = 8.2 Hz, 1H, aryl- $H$ ), 7.49 (t,  $J$  = 7.8 Hz, 2H, aryl- $H$ ), 7.24 (d,  $J$  = 4.6 Hz, 1H, aryl- $H$ ), 7.11-6.92 (m, 12H, aryl- $H$ ), 6.82-6.75 (m, 6H, aryl- $H$ ), 6.71 (d,  $J$  = 7.1 Hz, 1H, aryl- $H$ ), 6.36 (d,  $J$  = 7.8 Hz, 4H, aryl- $H$ ), 6.04 (d,  $J$  = 7.1 Hz, 1H, aryl- $H$ ), 5.47 (s, 2H,  $\text{CH}(\text{PhMe})_2$ ), 2.29 (s, 6H,  $\text{CH}(\text{PhMe})_2$ ), 2.26 (s, 3H,  $\text{Ar-CH}_3$ ), 1.68 (s, 6H,  $\text{CH}(\text{PhMe})_2$ ).  $^{13}\text{C}$  NMR (126 MHz,  $\text{CDCl}_3$ )  $\delta$  163.50 ( $\text{N=C}$ ), 160.99 ( $\text{N=C}$ ), 152.16, 146.75, 140.56, 140.45, 139.29, 135.42, 134.70, 132.48, 132.44, 130.16, 129.88, 129.75, 129.51, 129.48, 129.41, 129.30, 129.25, 128.92, 128.86, 128.70, 128.63, 128.49, 128.35, 128.20, 127.30, 127.04, 126.86, 124.25, 124.22, 123.00, 118.25, 51.57 ( $\text{CH}(\text{PhMe})_2$ ), 21.67 ( $\text{Ar-CH}_3$ ), 21.15 ( $\text{CH}(\text{PhMe})_2$ ), 20.47 ( $\text{CH}(\text{PhMe})_2$ ). ESI-MS ( $m/z$ ): calcd for  $\text{C}_{55}\text{H}_{47}\text{N}_2$ :  $[\text{M}+\text{H}]^+$  735.3739, found: 735.3751.

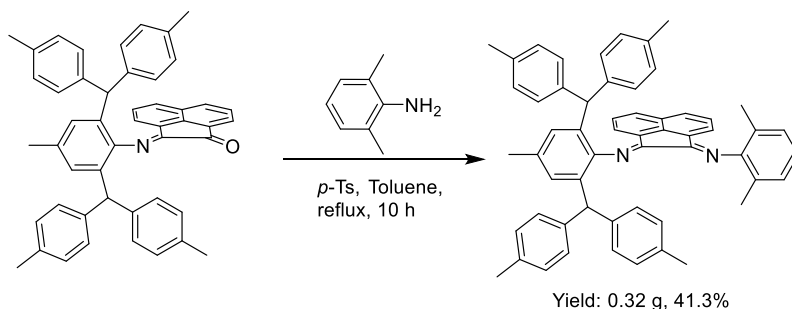

**Acenaphthylene-1-[2,6-bis(di-*p*-tolylmethyl)-4-methylphenylimino]-2-(2,6-dimethylphenyl)imine (L2) .**

A solution of 2-((2,6-bis(di-*p*-tolylmethyl)-4-methylphenyl)imino)acenaphthylen-1-one (0.66 g, 1 mmol, 1.0 equiv.), 2,6-dimethylaniline (0.24 g, 2 mmol, 2.0 equiv.) and *p*-toluenesulfonic acid (10 mg) in toluene (30 mL) was refluxed for 10 h, until there was one main point on the TLC plate. The desired compound was isolated using column chromatography on silica gel with petroleum ether-ethyl acetate (v/v = 40:1). The pure compound was obtained as a yellow solid (41.3%, 0.32 g). <sup>1</sup>H NMR (500 MHz, CDCl<sub>3</sub>) δ 7.70 (d, *J* = 8.2 Hz, 1H, aryl-*H*), 7.57 (d, *J* = 8.2 Hz, 1H, aryl-*H*), 7.24 (d, *J* = 7.5 Hz, 1H, aryl-*H*), 7.17 (d, *J* = 7.5 Hz, 2H, aryl-*H*), 7.09-6.99 (m, 9H, aryl-*H*), 6.93-6.88 (m, 1H, aryl-*H*), 6.79 (dd, *J* = 9.8, 7.6 Hz, 6H, aryl-*H*), 6.53 (d, *J* = 7.1 Hz, 1H, aryl-*H*), 6.30 (d, *J* = 7.8 Hz, 4H, aryl-*H*), 5.92 (d, *J* = 7.1 Hz, 1H, aryl-*H*), 5.51 (s, 2H, CH(PhMe)<sub>2</sub>), 2.29 (s, 6H, CH(PhMe)<sub>2</sub>), 2.27 (s, 3H, Ar-CH<sub>3</sub>), 2.23 (s, 6H, aryl-CH<sub>3</sub>), 1.63 (s, 6H, CH(PhMe)<sub>2</sub>). <sup>13</sup>C NMR (126 MHz, CDCl<sub>3</sub>) δ 163.72 (N=C), 161.66 (N=C), 149.53, 146.89, 140.60, 139.87, 139.14, 135.50, 134.71, 132.54, 129.94, 129.87, 129.55, 129.03, 128.90, 128.57, 128.51, 128.47, 128.42, 128.40, 127.01, 126.99, 125.01, 124.59, 123.74, 121.68, 51.65 (CH(PhMe)<sub>2</sub>), 29.84 (Ar-CH<sub>3</sub>), 21.67 (Aryl-CH<sub>3</sub>), 21.13 (CH(PhMe)<sub>2</sub>), 20.42 (CH(PhMe)<sub>2</sub>), 18.29 (aryl-CH<sub>3</sub>). ESI-MS (*m/z*): calcd for C<sub>57</sub>H<sub>51</sub>N<sub>2</sub>: [M+H]<sup>+</sup> 763.4052, found: 763.4066.

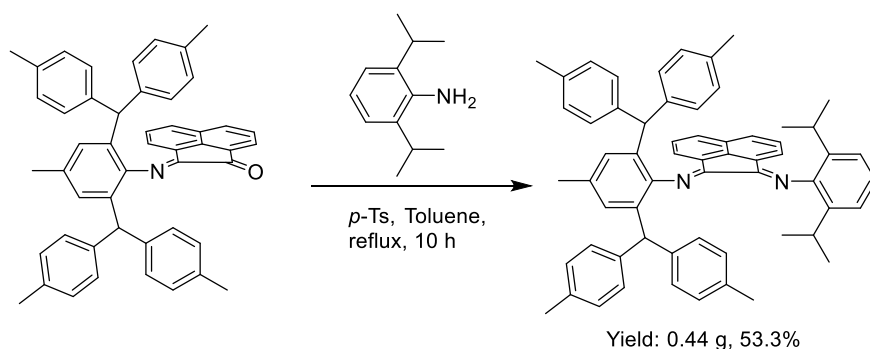

**Acenaphthylene-1-[2,6-bis(di-*p*-tolylmethyl)-4-methylphenylimino]-2-(2,6-diisopropylphenyl)imine (L3).**

A solution of 2-((2,6-bis(di-*p*-tolylmethyl)-4-methylphenyl)imino)acenaphthylen-1-one (0.66 g, 1 mmol, 1.0 equiv.), 2,6-diisopropylaniline (0.35 g, 2 mmol, 2.0 equiv.) and *p*-toluenesulfonic acid (10 mg) in toluene (30 mL) was refluxed for 10 h, until there was one main point on the TLC plate. The solution was evaporated at reduced pressure, and the remaining solution was diluted in methanol (100 mL). The yellow solid was isolated by filtration, followed by recrystallization from dichloromethane and *n*-hexane (53.3%, 0.44 g). <sup>1</sup>H NMR (500 MHz, CDCl<sub>3</sub>) δ 7.66 (d, *J* = 8.2 Hz, 1H), 7.50 (d, *J* = 8.2 Hz, 1H), 7.31-7.26 (m, 3H), 7.23-7.19 (m, 1H), 7.03 (dd, *J* = 19.8, 8.1 Hz, 8H), 6.79 (dd, *J* = 14.5, 8.4 Hz, 7H), 6.44 (d, *J* = 7.1 Hz, 1H), 6.25 (d, *J* = 7.8 Hz, 4H), 5.72 (d, *J* = 7.1 Hz, 1H), 5.54 (s, 2H, CH(PhMe)<sub>2</sub>), 3.24-3.13 (m, 2H, CH(CH<sub>3</sub>)<sub>2</sub>), 2.30 (s, 6H, CH(PhMe)<sub>2</sub>), 2.28 (s, 3H, Ar-CH<sub>3</sub>), 1.62 (s, 6H, CH(PhMe)<sub>2</sub>), 1.28 (d, *J* = 6.8 Hz, 6H, CH(CH<sub>3</sub>)<sub>2</sub>), 1.02 (d, *J* = 6.9 Hz, 6H, CH(CH<sub>3</sub>)<sub>2</sub>). <sup>13</sup>C NMR (126 MHz, CDCl<sub>3</sub>) δ 163.92 (N=C), 162.32 (N=C), 147.28, 146.96, 140.94, 140.11, 139.88, 138.94, 135.88, 135.54, 135.47, 134.69, 132.59, 132.53, 129.85, 129.68, 129.57, 129.46, 129.26, 129.00, 128.93, 128.81, 128.62, 128.56, 128.38, 128.11, 127.99, 126.96,

126.83, 126.58, 124.65, 124.51, 124.42, 123.64, 123.59, 123.47, 122.83, 51.51 (CH(PhMe)<sub>2</sub>), 29.84 (CH(CH<sub>3</sub>)<sub>2</sub>), 28.62 (CH(CH<sub>3</sub>)<sub>2</sub>), 24.37 (CH(CH<sub>3</sub>)<sub>2</sub>), 23.84 (CH(CH<sub>3</sub>)<sub>2</sub>), 23.55 (CH(CH<sub>3</sub>)<sub>2</sub>), 23.27 (CH(CH<sub>3</sub>)<sub>2</sub>), 21.66 (Ar-CH<sub>3</sub>), 21.12 (CH(PhMe)<sub>2</sub>), 20.43 (CH(PhMe)<sub>2</sub>). ESI-MS (m/z): calcd for C<sub>61</sub>H<sub>59</sub>N<sub>2</sub>: [M+H]<sup>+</sup> 819.4678, found: 819.4694.

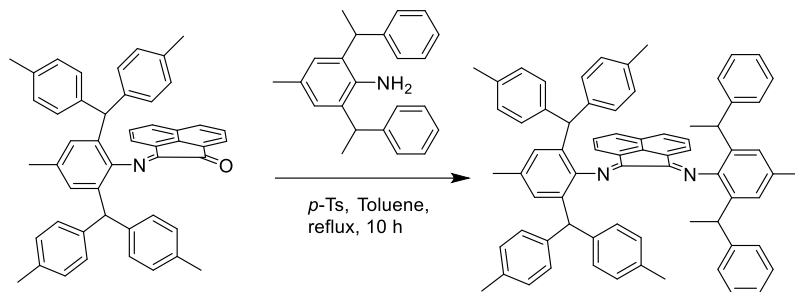

Yield: 0.47 g, 49.6%

**Acenaphthylene-1-[2,6-bis(di-*p*-tolylmethyl)-4-methylphenylimino]-2-(2,6-bis(*sec*-phenethyl)-4-methylphenyl)imine (L4).** Using the same procedure as for the synthesis of L3, L4 was obtained as a yellow powder at 49.6% yield (0.47 g). <sup>1</sup>H NMR (500 MHz, CDCl<sub>3</sub>) δ 7.70–7.53 (m, 2H), 7.18 – 6.65 (m, 28H), 6.55 – 6.16 (m, 5H), 6.12 – 5.83 (m, 1H), 5.68 – 5.46 (m, 2H, CH(PhMe)<sub>2</sub>), 4.34 – 4.24 (m, 2H, CHPhMe), 2.43 – 2.19 (m, 12H, CH(PhMe)<sub>2</sub>+ Ar-CH<sub>3</sub>), 1.88 – 1.54 (m, 12H, CH(PhMe)<sub>2</sub>+ CHPhMe). <sup>13</sup>C NMR (126 MHz, CDCl<sub>3</sub>) δ 163.77 (C=N), 162.79 (C=N), 162.13 (C=N), 161.60 (C=N), 146.79, 145.71, 145.44, 145.07, 141.11, 140.64, 140.61, 140.08, 139.98, 139.82, 139.24, 135.97, 135.32, 135.26, 134.59, 133.73, 132.49, 132.13, 129.77, 129.47, 129.37, 129.17, 128.91, 128.70, 128.65, 128.50, 128.19, 128.10, 127.98, 127.84, 127.75, 127.67, 127.43, 126.51, 125.52, 125.01, 124.88, 123.60, 51.64 (CH(PhMe)<sub>2</sub>), 51.43 (CH(PhMe)<sub>2</sub>), 51.34 (CH(PhMe)<sub>2</sub>), 51.28 (CH(PhMe)<sub>2</sub>), 51.13 (CH(PhMe)<sub>2</sub>), 40.59 (CHPhMe), 40.40 (CHPhMe), 40.32 (CHPhMe), 40.06 (CHPhMe), 39.73 (CHPhMe), 22.30 (Ar-CH<sub>3</sub>), 22.27 (Ar-CH<sub>3</sub>), 21.86 (CH(PhMe)<sub>2</sub>), 21.73 (CH(PhMe)<sub>2</sub>), 21.66 (CH(PhMe)<sub>2</sub>), 21.56 (CH(PhMe)<sub>2</sub>), 21.19 (CHPhMe), 21.09 (CHPhMe), 21.02 (CHPhMe), 20.94 (CHPhMe), 20.37 (CHPhMe), 20.34 (CHPhMe). ESI-MS (m/z): calcd for C<sub>72</sub>H<sub>65</sub>N<sub>2</sub>: [M+H]<sup>+</sup> 957.5148, found: 957.5170.

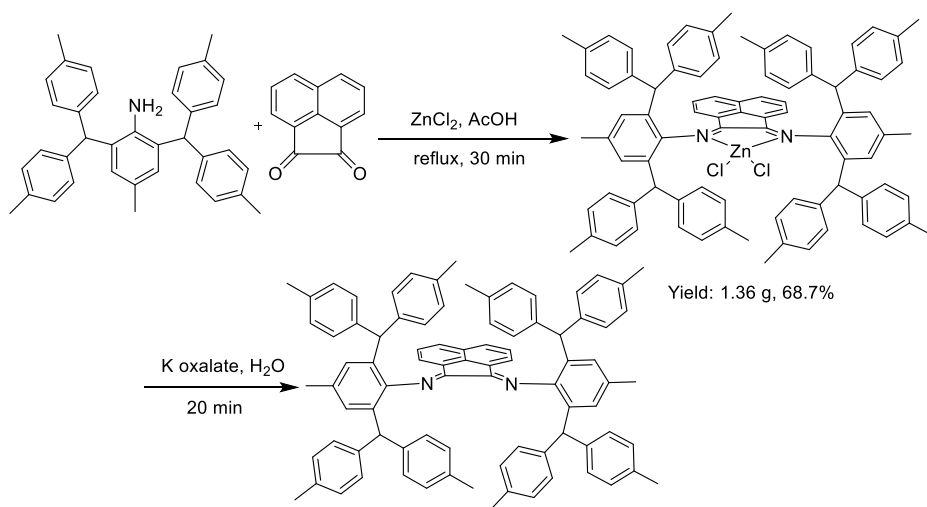

Yield: 1.36 g, 68.7%

Yield: 0.85 g, 70.1%



**Acenaphthylene-bis[2,6-bis(di-*p*-tolylmethyl)-4-methylphenyl]-1,2-diimine (L4).**  $\text{ZnCl}_2$  (0.24 g, 1.79 mmol) and acenaphthenequinone (0.29 g, 1.57 mmol) were suspended in glacial acetic acid (6 mL). 2,6-Bis(diphenylmethyl)-4-methylaniline (1.77 g, 3.57 mmol) was added, and the reaction mixture was refluxed under stirring for 30 min. The solution was allowed to cool to room temperature, and a bright orange-red solid precipitated. The solid was separated by filtration and washed with acetic acid ( $3 \times 5\text{ mL}$ ) and diethyl ether ( $5 \times 5\text{ mL}$ ), to remove remaining acetic acid. Drying under vacuum gave bright orange-red, poorly soluble solid (1.36 g, 68.7%). Then the zinc was removed from the zinc diimine complex. The product of the previous step was suspended in methylene chloride (24 mL), and a solution of potassium oxalate (0.22 g, 1.2 mmol) in water (2 mL) was added. The reaction mixture was stirred vigorously for 20 min. The two phases were separated, and the organic layer was washed with water ( $3 \times 10\text{ mL}$ ) and dried with  $\text{MgSO}_4$ . After filtration the solvent was removed under vacuum to afford the product as an orange powder (0.85 g, 70.1%), followed by recrystallization from dichloromethane and *n*-hexane. The total yield of two steps is 48.2%.  $^1\text{H}$  NMR (500 MHz,  $\text{CDCl}_3$ )  $\delta$  7.55 (d,  $J = 8.1\text{ Hz}$ , 2H), 6.99 – 6.83 (m, 22H), 6.72 (d,  $J = 5.6\text{ Hz}$ , 8H), 6.39 (d,  $J = 5.6\text{ Hz}$ , 8H), 6.12 (d,  $J = 5.1\text{ Hz}$ , 2H), 5.56 (s, 4H,  $\text{CH}(\text{PhMe})_2$ ), 2.27 (s, 6H, Ar- $\text{CH}_3$ ), 2.25 (s, 12H,  $\text{CH}(\text{PhMe})_2$ ), 1.88 (s, 12H,  $\text{CH}(\text{PhMe})_2$ ).  $^{13}\text{C}$  NMR (126 MHz,  $\text{CDCl}_3$ )  $\delta$  163.53 ( $\text{C}=\text{N}$ ), 146.70, 141.17, 140.07, 139.82, 135.25, 134.80, 132.52, 131.84, 129.91, 129.49, 129.21, 128.78, 128.60, 128.55, 127.09, 126.57, 124.49, 50.73 ( $\text{CH}(\text{PhMe})_2$ ), 21.64 (Ar- $\text{CH}_3$ ), 21.09 ( $\text{CH}(\text{PhMe})_2$ ), 20.69 ( $\text{CH}(\text{PhMe})_2$ ). This compound is known.<sup>1</sup>

## 2.5 Procedure for the Synthesis of Nickel Complexes 1-5.

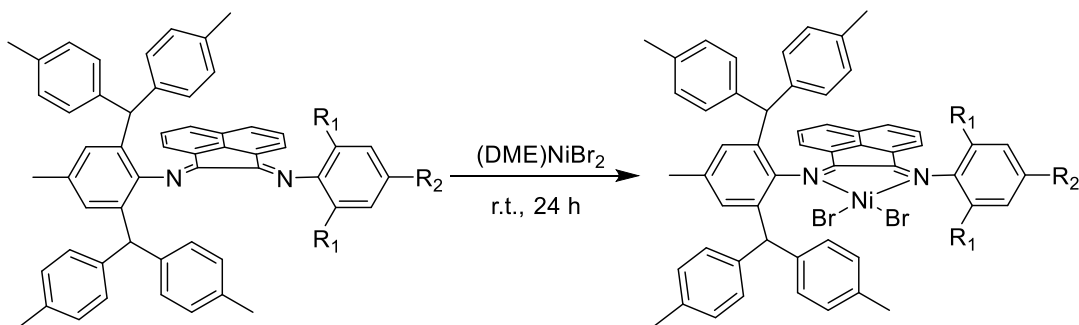

- L1:  $\text{R}_1 = \text{H}$ ,  $\text{R}_2 = \text{H}$   
 L2:  $\text{R}_1 = \text{Me}$ ,  $\text{R}_2 = \text{H}$   
 L3:  $\text{R}_1 = \text{CH}(\text{Me})_2$ ,  $\text{R}_2 = \text{H}$   
 L4:  $\text{R}_1 = \text{CHMePh}$ ,  $\text{R}_2 = \text{Me}$   
 L5:  $\text{R}_1 = \text{CH}(\text{PhMe})_2$ ,  $\text{R}_2 = \text{Me}$

- 1:  $\text{R}_1 = \text{H}$ ,  $\text{R}_2 = \text{H}$   
 2:  $\text{R}_1 = \text{Me}$ ,  $\text{R}_2 = \text{H}$   
 3:  $\text{R}_1 = \text{CH}(\text{Me})_2$ ,  $\text{R}_2 = \text{H}$   
 4:  $\text{R}_1 = \text{CHMePh}$ ,  $\text{R}_2 = \text{Me}$   
 5:  $\text{R}_1 = \text{CH}(\text{PhMe})_2$ ,  $\text{R}_2 = \text{Me}$

Complexes **1-5** were synthesized by the reaction of 1 equiv. of  $(\text{DME})\text{NiBr}_2$  with the corresponding ligands in methylene chloride. The corresponding ligand (0.3 mmol) was added in 10 mL of methylene chloride in a Schlenk tube under a nitrogen atmosphere. A suspension of  $(\text{DME})\text{NiBr}_2$  (0.3 mmol) in  $\text{CH}_2\text{Cl}_2$  (10 mL) was added to the above solution. The resulting mixture was stirred at room temperature for 24 hours. The solvent was evaporated under reduced pressure to afford a solid. The product was washed with  $4 \times 5\text{ mL}$  diethyl ether and dried under vacuum. The single crystal can be obtained by diffusion from layering hexane on to the  $\text{CH}_2\text{Cl}_2$  solution at room temperature.

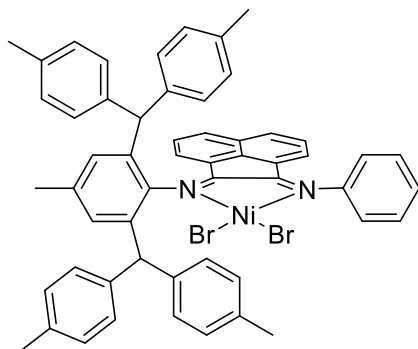

**Complex 1.** Brown solid. Yield: 0.25 g, 86%. Elem. Anal. Calcd for  $C_{55}H_{46}Br_2N_2Ni$ : C, 69.28; H, 4.86; N, 2.94. Found: C, 69.02; H, 4.83; N, 2.99. MALDI-TOF-MS( $m/z$ ): calcd for  $C_{55}H_{47}BrN_2Ni$ :  $[M-Br+H]^+$  872.2276, found: 872.8820.

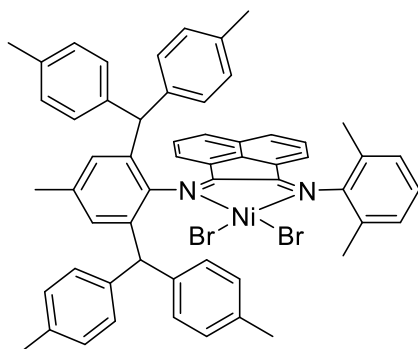

**Complex 2.** Brown solid. Yield: 0.26 g, 89.0%. Elem. Anal. Calcd for  $C_{57}H_{50}Br_2N_2Ni$ : C, 69.75; H, 5.13; N, 2.85. Found: C, 69.53; H, 4.99; N, 2.68. MALDI-TOF-MS( $m/z$ ): calcd for  $C_{57}H_{50}BrN_2Ni$ :  $[M-Br]^+$  901.2490, found: 901.2432.

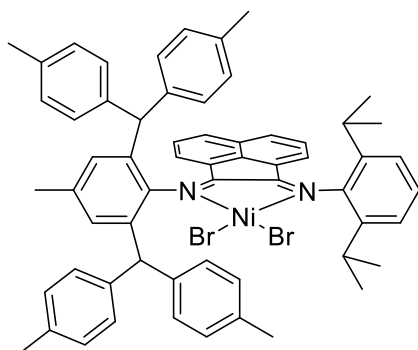

**Complex 3.** Brown solid. Yield: 0.28 g, 91%. Elem. Anal. Calcd for  $C_{61}H_{58}Br_2N_2Ni$ : C, 70.61; H, 5.63; N, 2.70. Found: C, 70.75; H, 5.73; N, 2.47. MALDI-TOF-MS( $m/z$ ): calcd for  $C_{61}H_{58}BrN_2Ni$ :  $[M-Br]^+$  957.3116, found: 957.3694.

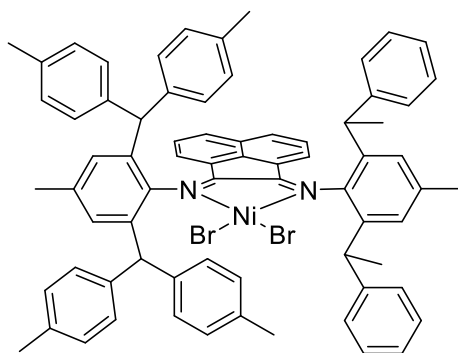

**Complex 4.** Brown solid. Yield 0.31 g, 87%. Elem. Anal. Calcd for  $C_{72}H_{64}Br_2N_2Ni$ : C, 73.55; H, 5.49; N, 2.38. Found: C, 73.40; H, 5.51; N, 2.46. MALDI-TOF-MS( $m/z$ ): calcd for  $C_{72}H_{65}BrN_2Ni$ :  $[M-Br+H]^+$  1094.3685, found: 1094.8672.

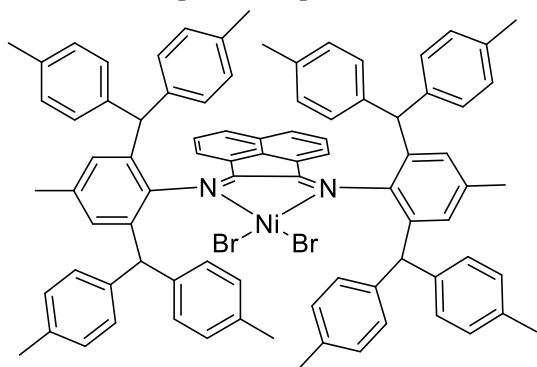

**Complex 5.** Brown solid. Yield: 0.38 g, 93%. This compound is known.<sup>3</sup>

## 2.6 General *in-Situ* Activated Polymerization Procedure.

Under an inert atmosphere, a 350 mL glass thick-walled pressure vessel was charged with MAO, 40 mL toluene, and a magnetic stir bar. The vessel was pressurized with 1 atm of ethylene and allowed to equilibrate under constant pressure for 10 minutes with stirring. The nickel complex in 1 mL  $CH_2Cl_2$  was injected and the ethylene pressure was increased to 8 atm to initiate polymerization and stirred continuously for the desired time. The polymerization was quenched via the addition of MeOH (5 mL) and the polymer was precipitated using excess acidic MeOH (5% HCl in MeOH) and dried in a vacuum oven to constant weight. Polymer branching density was determined by  $^1H$  NMR.  $B = 1000 \times 2(I_{CH_3}) / 3(I_{CH_2+CH} + I_{CH_3})$ .  $CH_3$  (m, 0.77-0.95 ppm);  $CH_2$  and  $CH$  (m, ca. 1.0-1.45 ppm).

## 2.7 Copolymerization of Ethylene and UA

In a typical experiment, a 300 mL stainless pressure reactor connected with a high pressure gas line was firstly dried at 90 °C under vacuum for at least 1 h. The reactor was then adjusted to the desired polymerization temperature. 20 mL of toluene with the desired amount  $Et_2AlCl$  was added to the reactor under  $N_2$  atmosphere, then the desired polar monomer and the desired amount of Ni catalyst in 2 mL of  $CH_2Cl_2$  was injected into the polymerization system via syringe subsequently. With a rapid stirring, the reactor was pressurized and maintained at the desired pressure of ethylene. After 1 h, the pressure reactor was vented and the copolymer was dried under vacuum overnight.

## 3. Spectra Data

### 3.1 $^1\text{H}$ and $^{13}\text{C}$ NMR of the Synthetic Compounds.

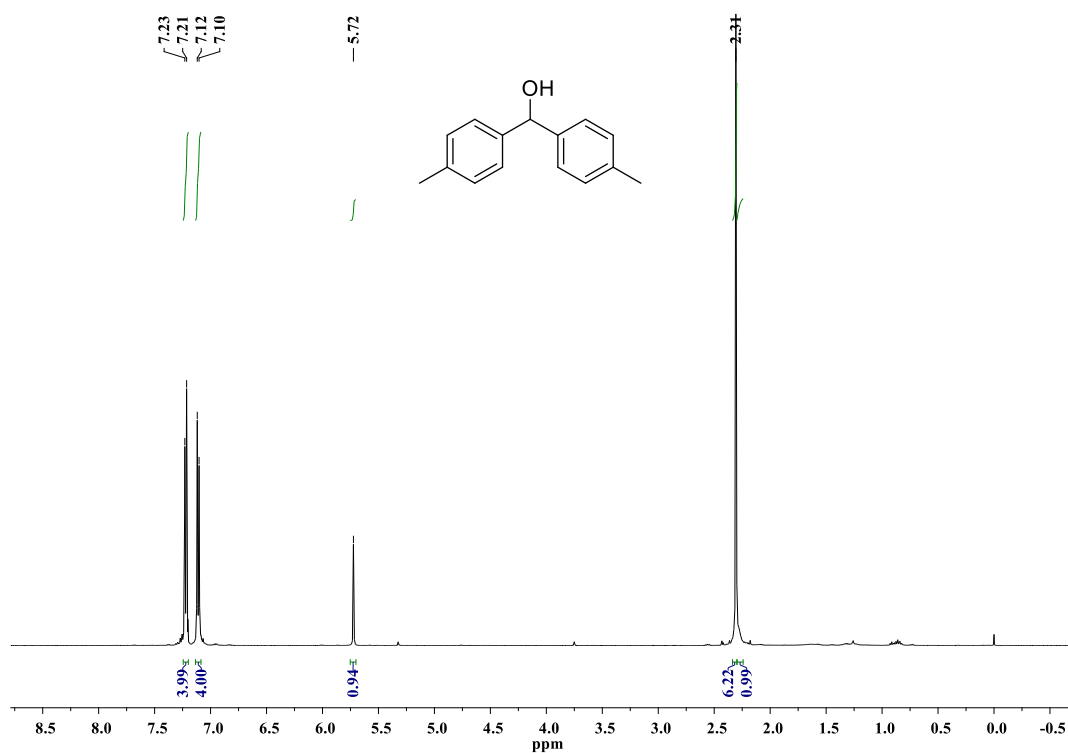

Figure S4.  $^1\text{H}$  NMR spectrum of bis(3-methylphenyl)methanol in  $\text{CDCl}_3$

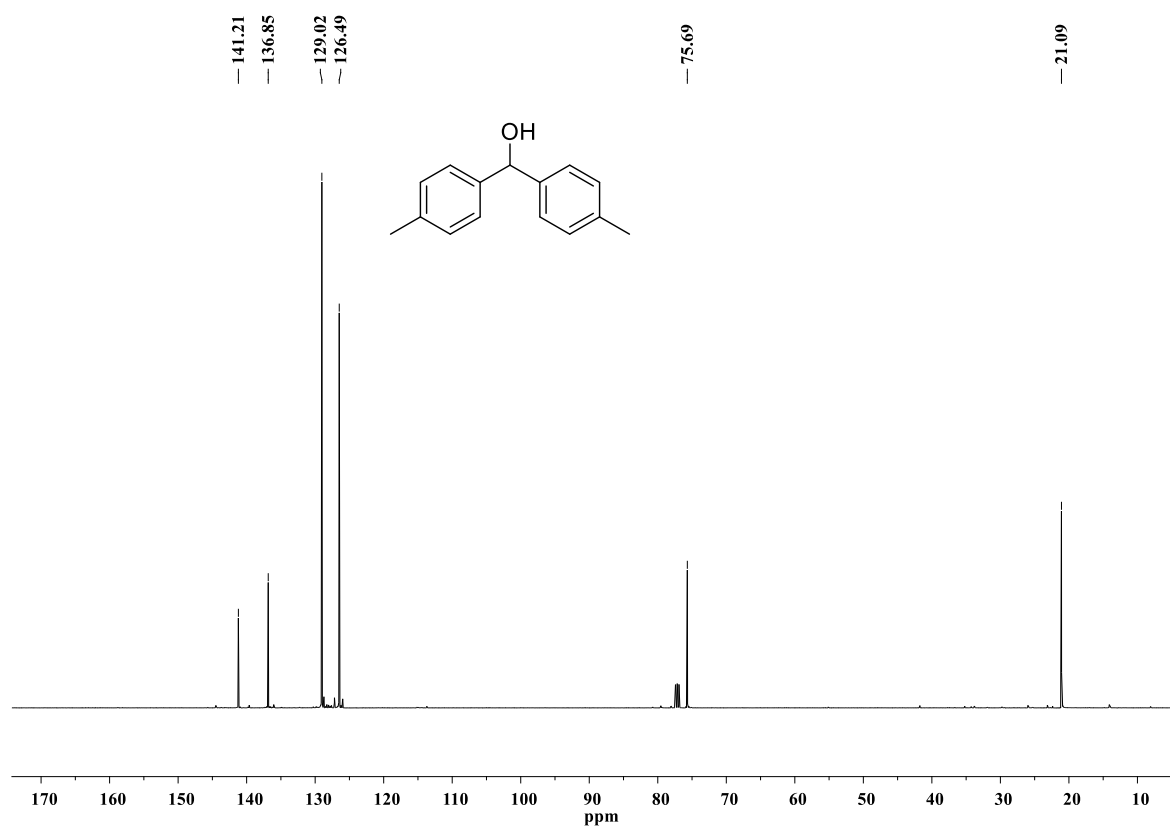

Figure S5.  $^{13}\text{C}$  NMR spectrum of bis(3-methylphenyl)methanol in  $\text{CDCl}_3$ .

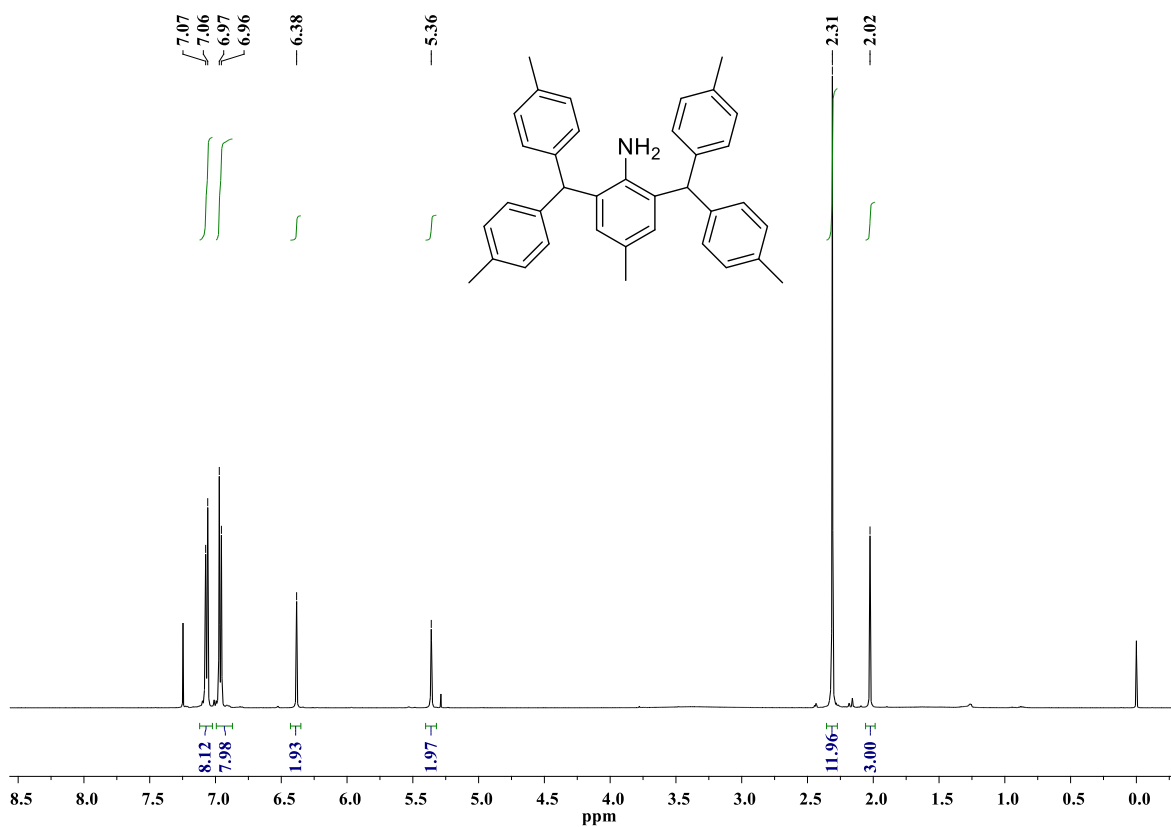

Figure S6. <sup>1</sup>H NMR spectrum of 2,6-Bis(di-p-tolylmethyl)-4-methylaniline in CDCl<sub>3</sub>.

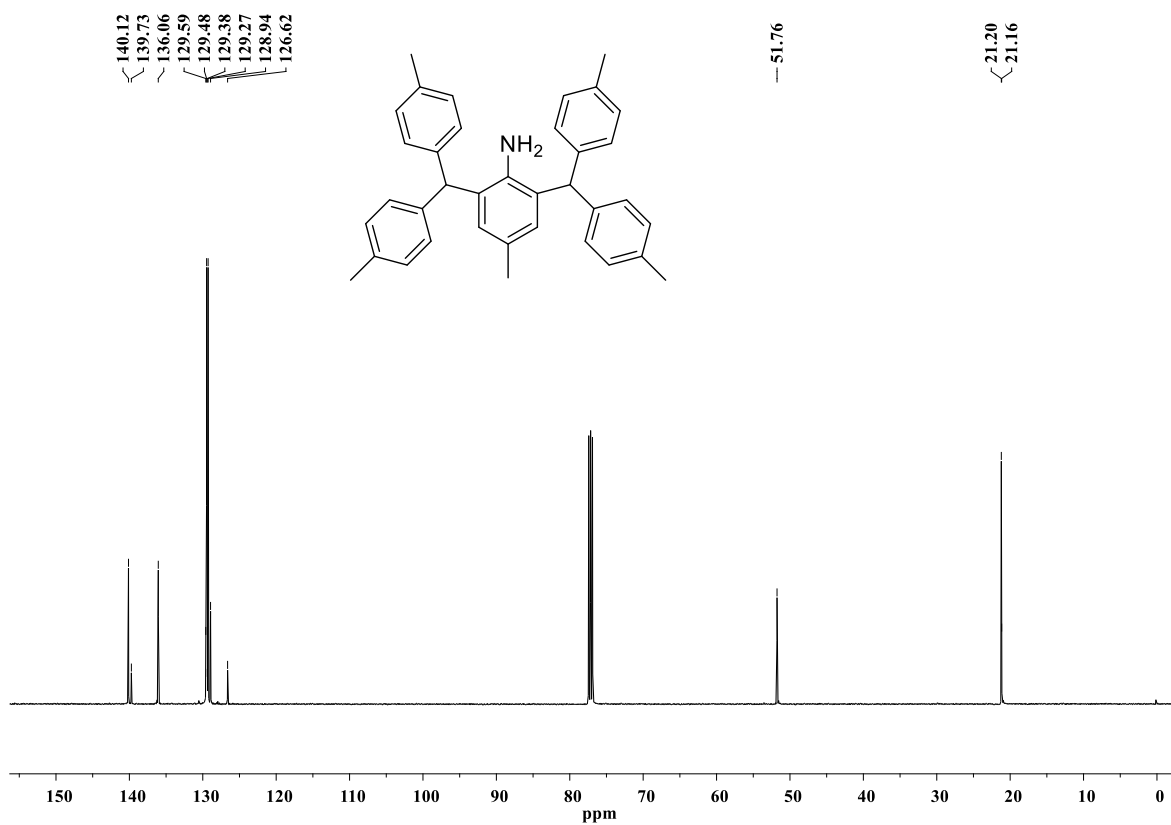

Figure S7. <sup>13</sup>C NMR spectrum of 2,6-Bis(di-p-tolylmethyl)-4-methylaniline in CDCl<sub>3</sub>.

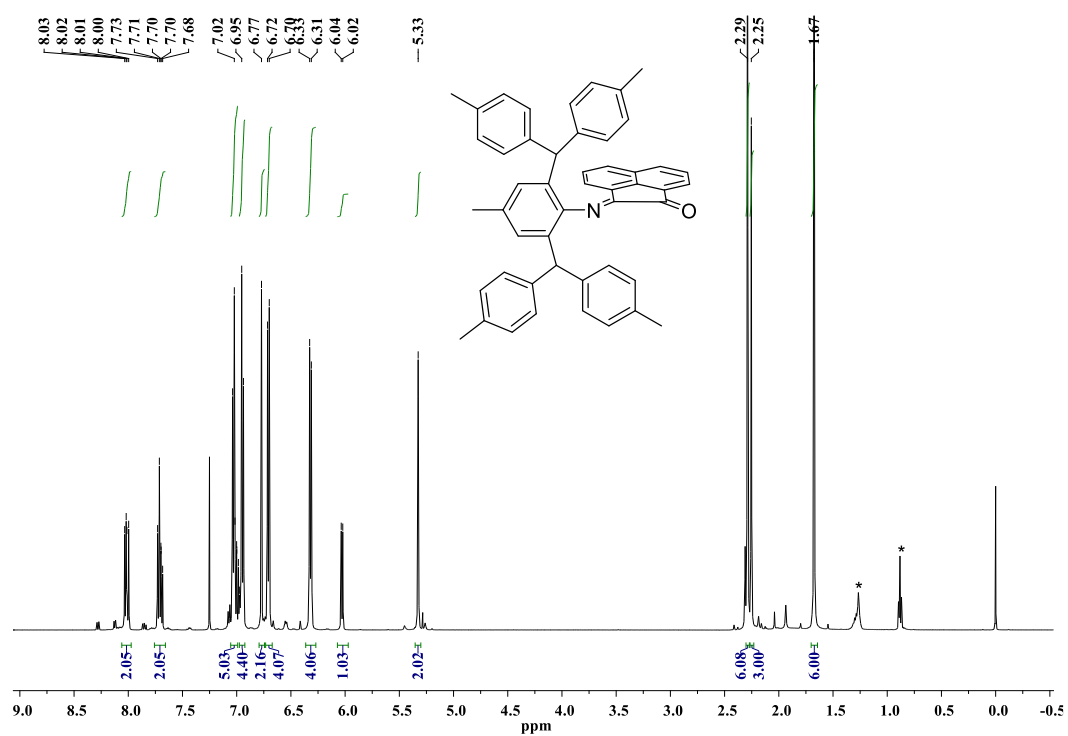

**Figure S8.** <sup>1</sup>H NMR spectrum of 2-((2,6-bis(di-p-tolylmethyl)-4-methylphenyl)imino)acenaphthylen-1-one in CDCl<sub>3</sub>. \*hexanes

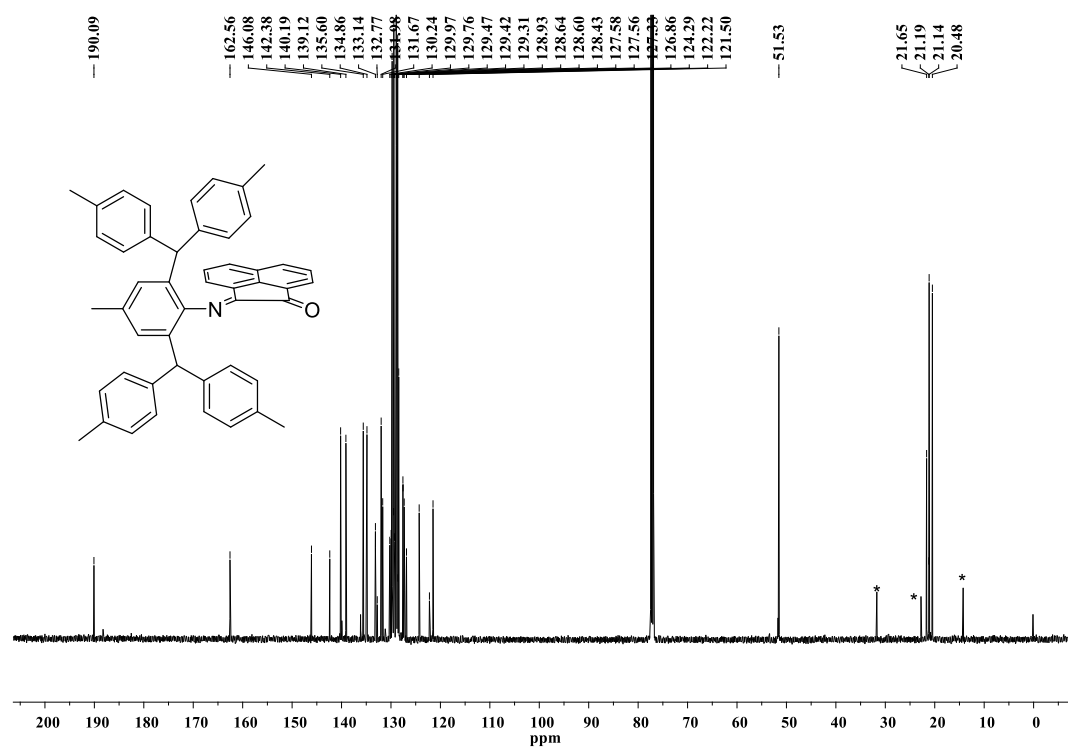

**Figure S9.** <sup>13</sup>C NMR spectrum of 2-((2,6-bis(di-p-tolylmethyl)-4-methylphenyl)imino)acenaphthylen-1-one in CDCl<sub>3</sub>. \*hexanes

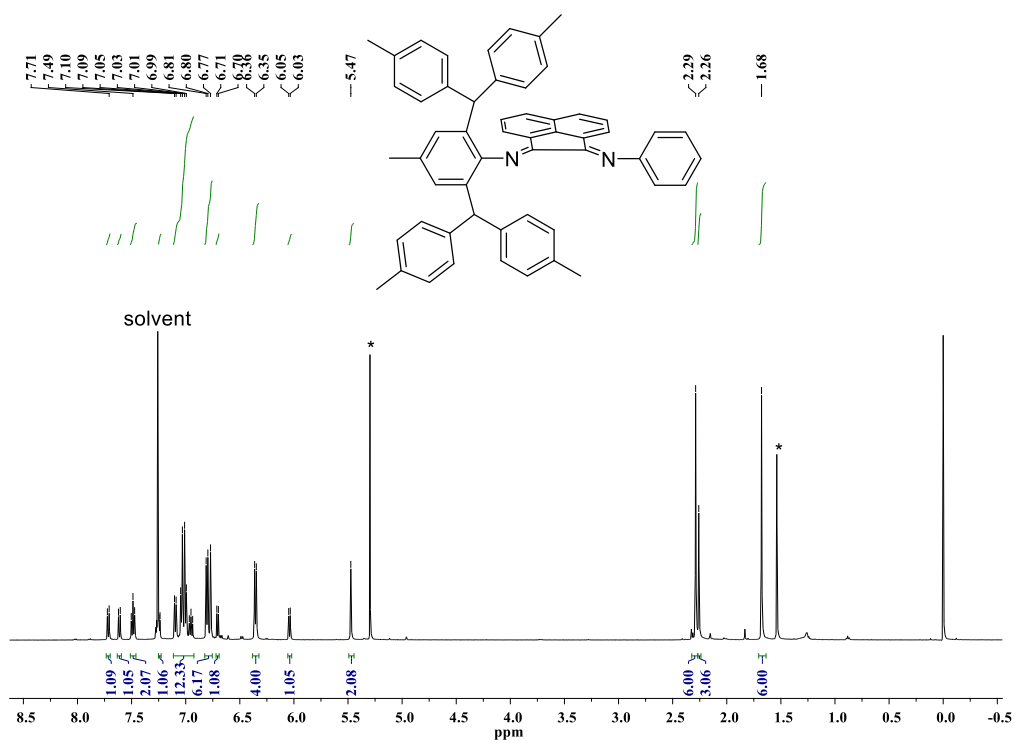

**Figure S10.** <sup>1</sup>H NMR spectrum of L1 in CDCl<sub>3</sub>, \*DCM, water.

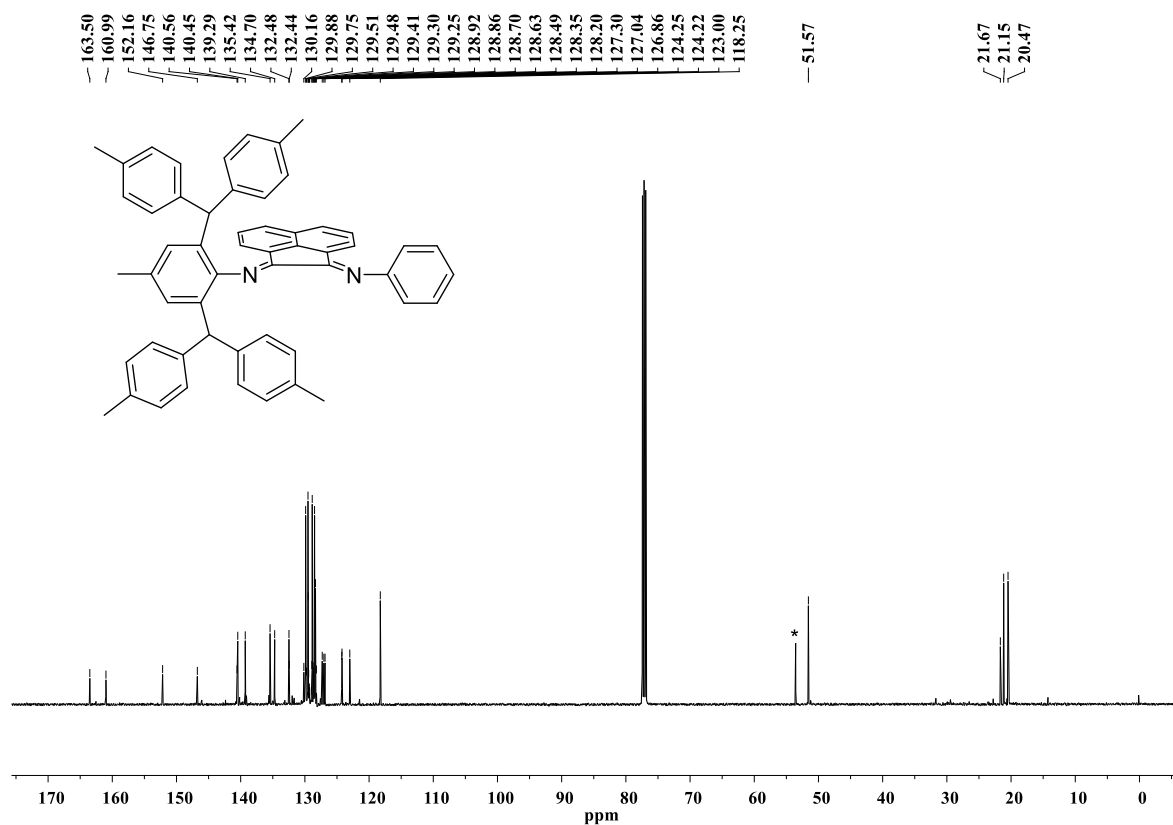

**Figure S11.** <sup>13</sup>C NMR spectrum of L1 in CDCl<sub>3</sub>, \*DCM.

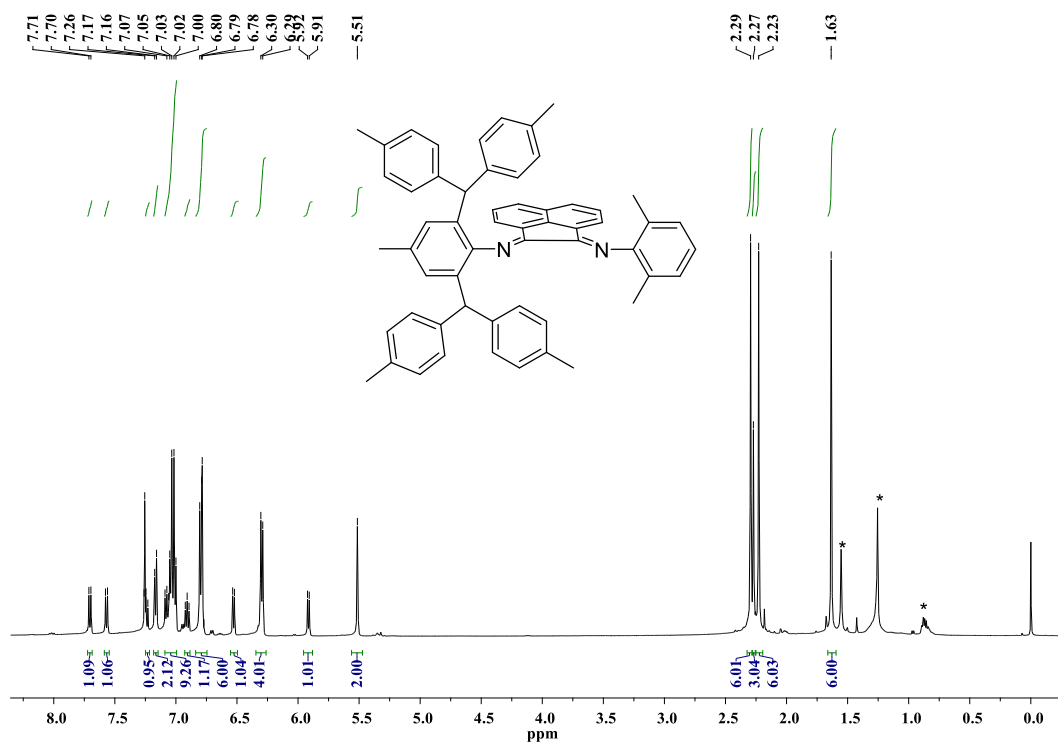

**Figure S12.** <sup>1</sup>H NMR spectrum of **L2** in CDCl<sub>3</sub>. \*hexanes, water.

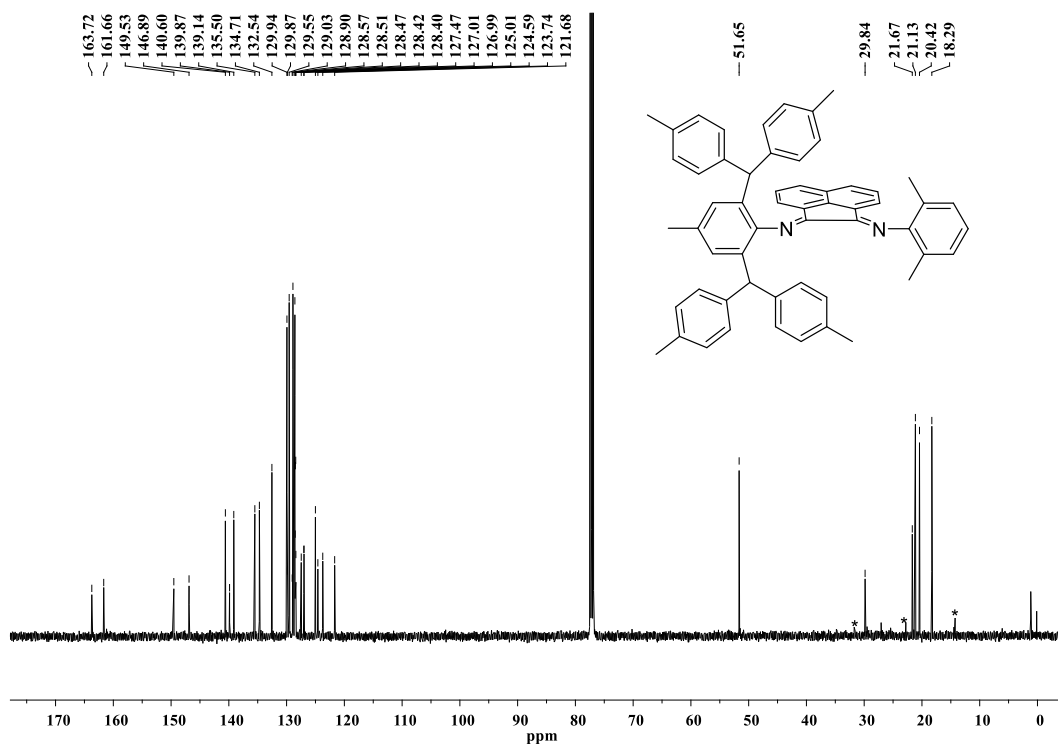

**Figure S13.** <sup>13</sup>C NMR spectrum of **L2** in CDCl<sub>3</sub>. \*hexanes



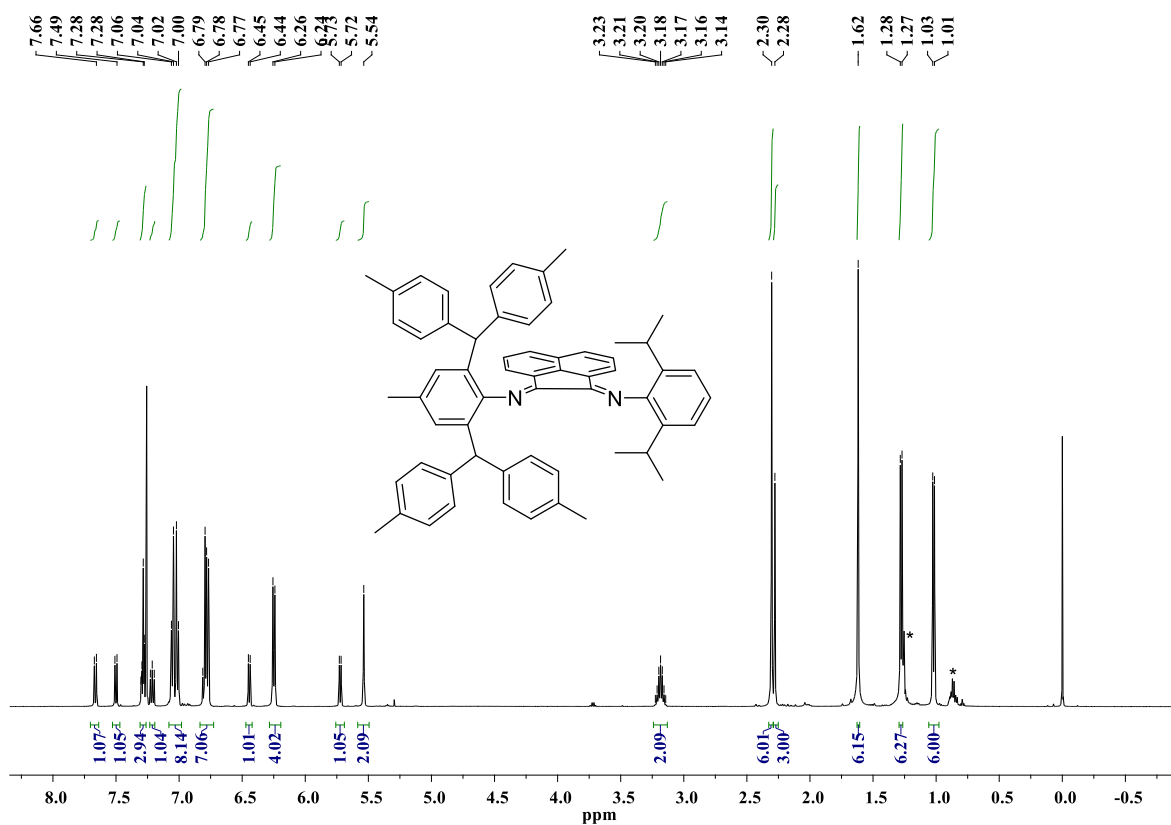

**Figure S14.** <sup>1</sup>H NMR spectrum of **L3** in CDCl<sub>3</sub>. \*hexanes

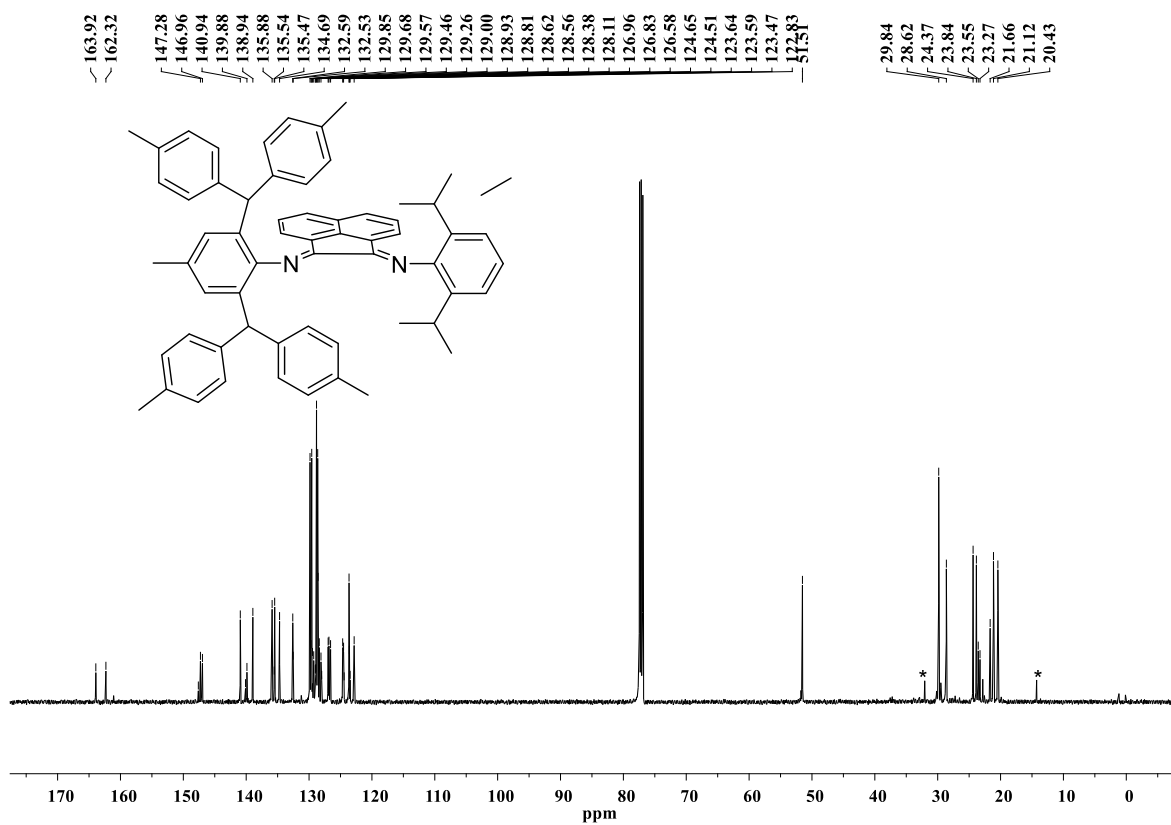

**Figure S15.** <sup>13</sup>C NMR spectrum of **L3** in CDCl<sub>3</sub>. \*hexanes

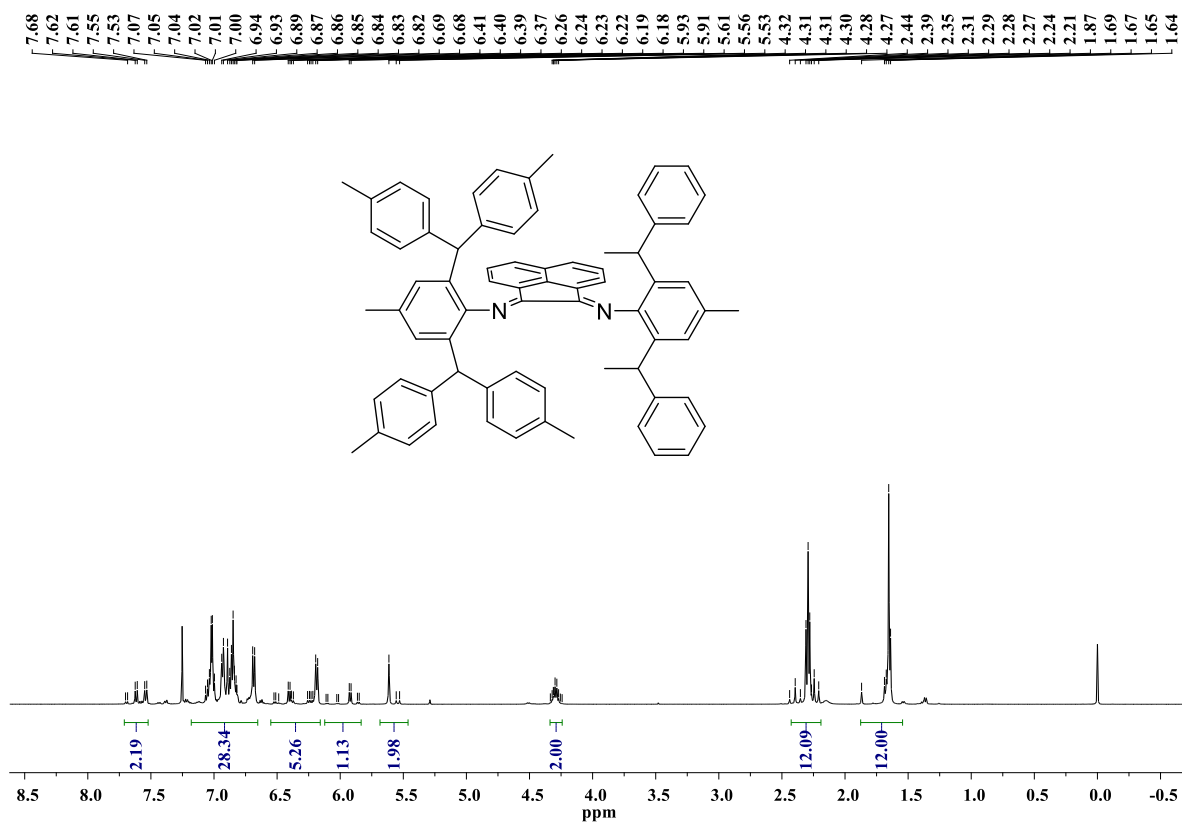

Figure S16. <sup>1</sup>H NMR spectrum of L4 in CDCl<sub>3</sub>.

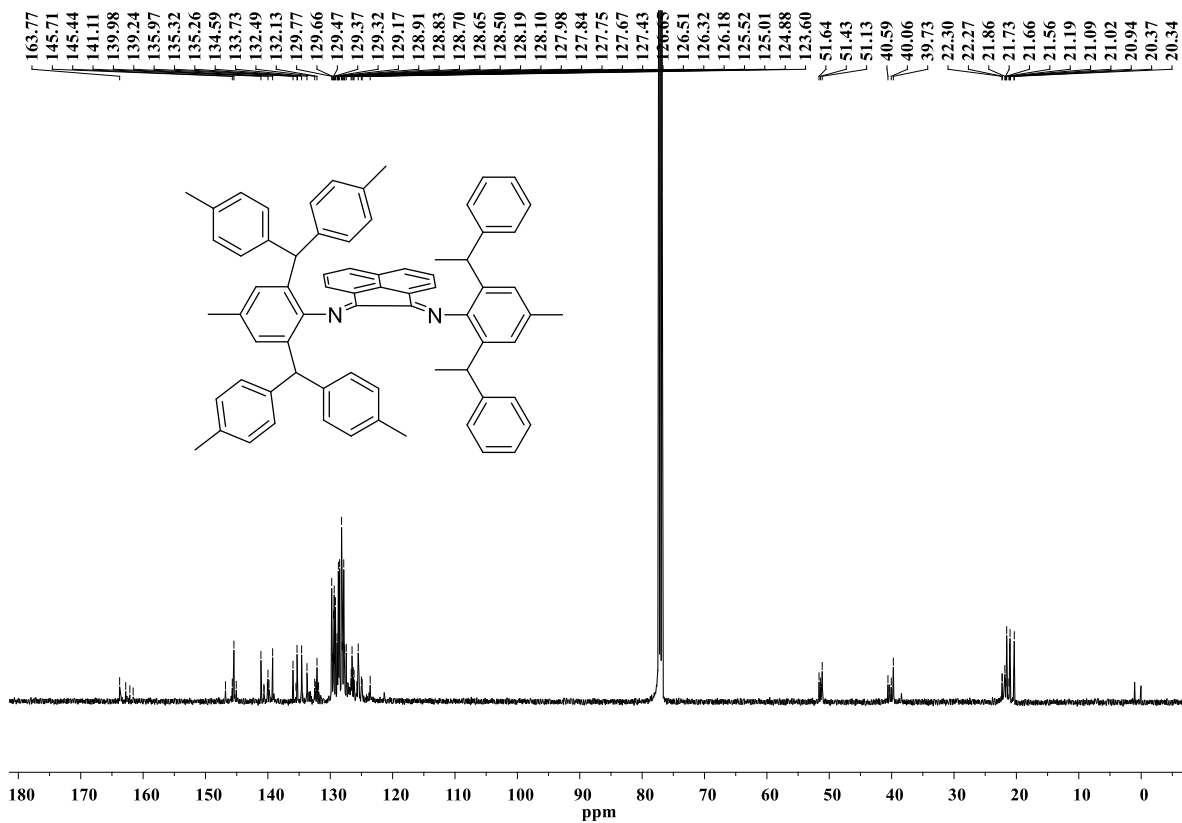

Figure S17. <sup>13</sup>C NMR spectrum of L4 in CDCl<sub>3</sub>.

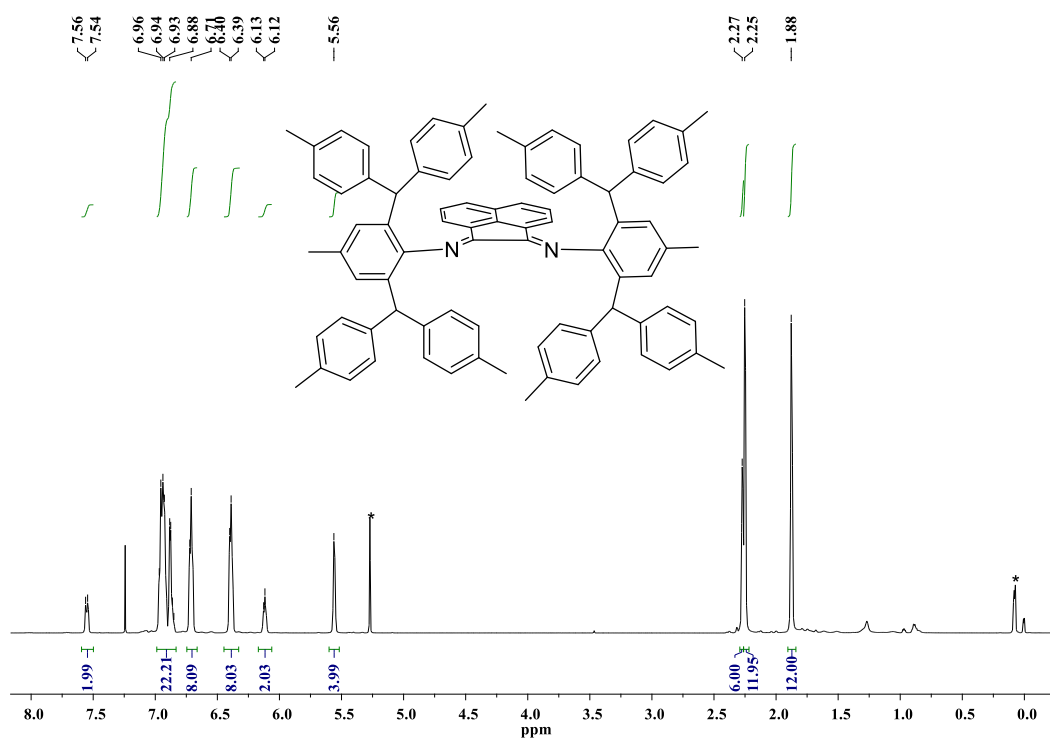

**Figure S18.** <sup>1</sup>H NMR spectrum of **L5** in CDCl<sub>3</sub>. \*DCM, grease.

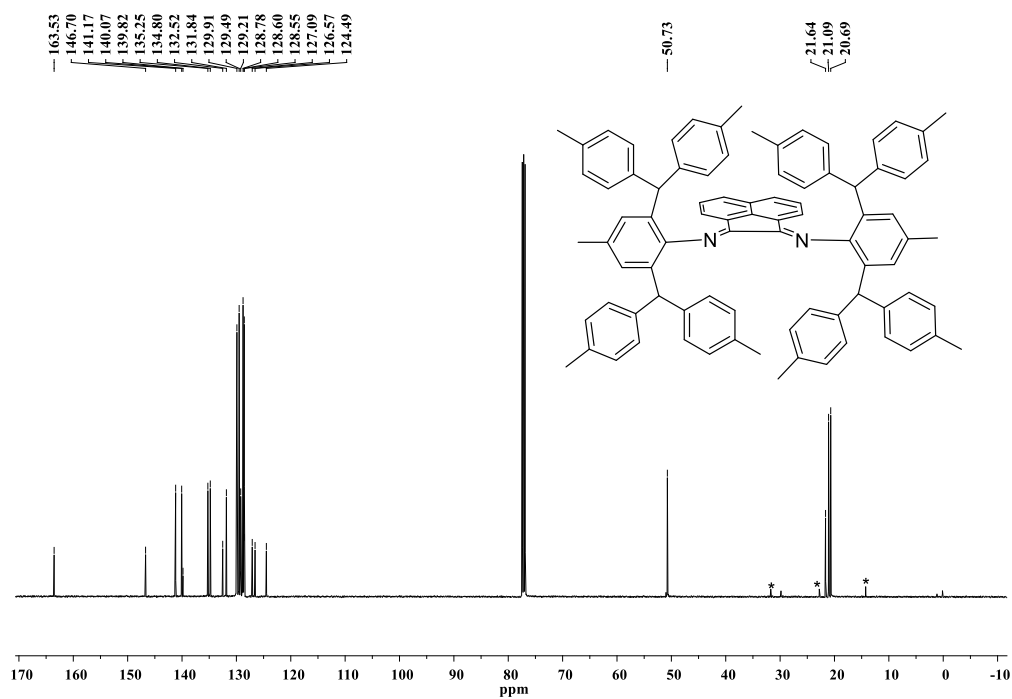

**Figure S19.** <sup>13</sup>C NMR spectrum of **L5** in CDCl<sub>3</sub>. \*hexanes.

### 3.2 ESI-MS of Ligand L1-L4.

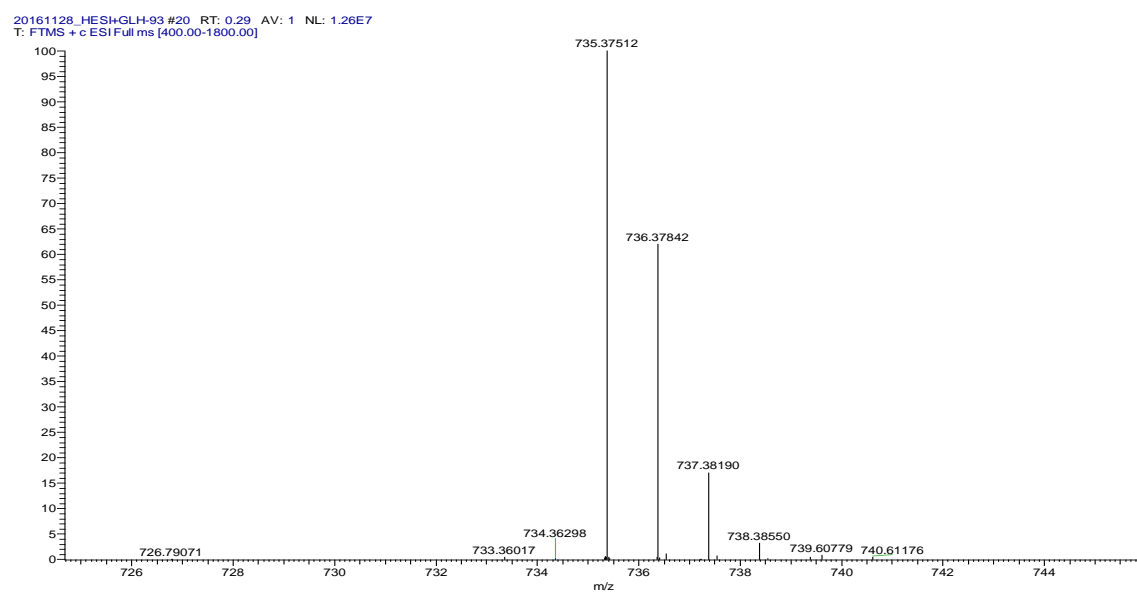

**Figure S20.** ESI-MS of L1.

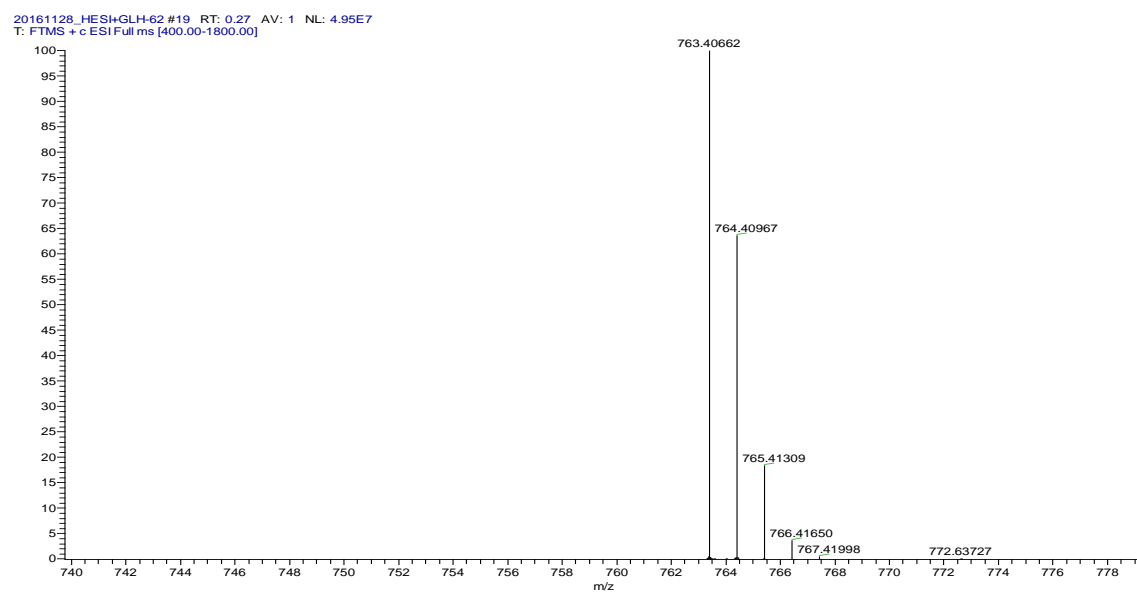

**Figure S21.** ESI-MS of L2.

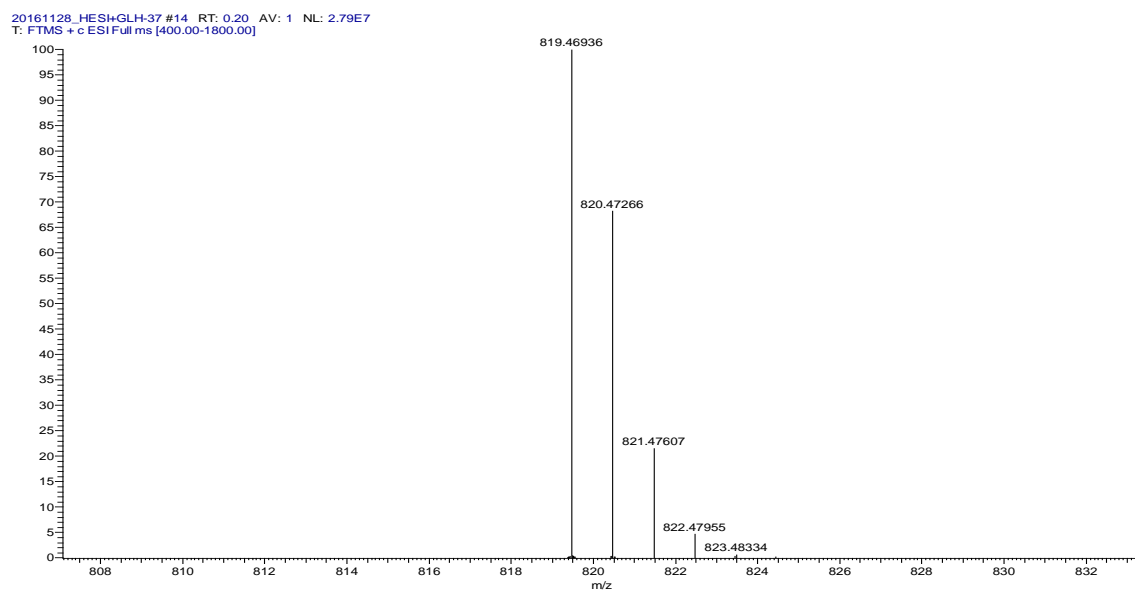

**Figure S22. ESI-MS of L3.**

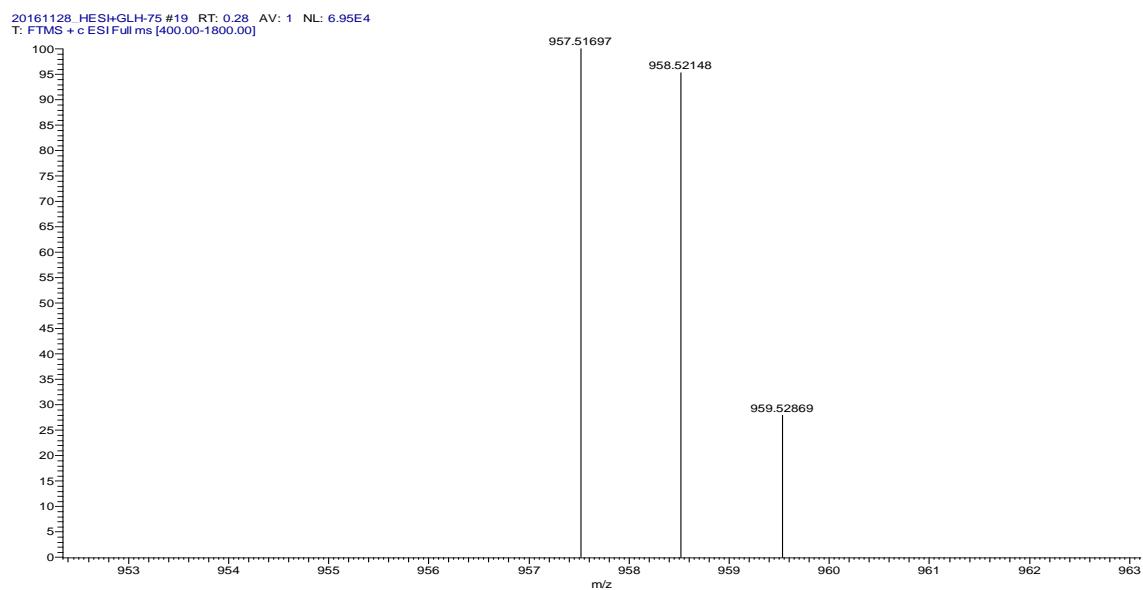

**Figure S23. ESI-MS of L4.**

### 3.3 MALDI-TOF of Complexes 1-4.

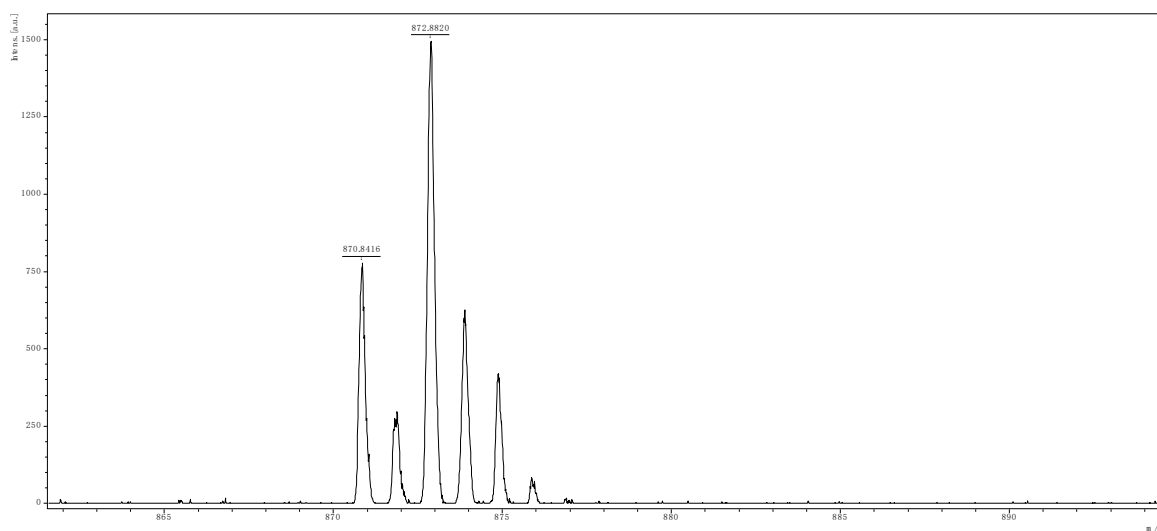

**Figure S24.** MALDI-TOF-MS of complex 1.

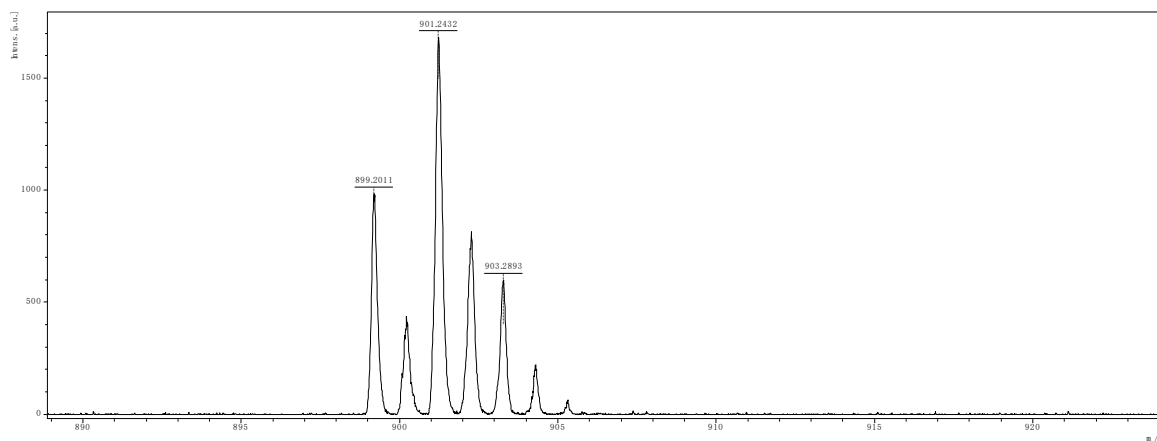

**Figure S25.** MALDI-TOF-MS of complex 2.

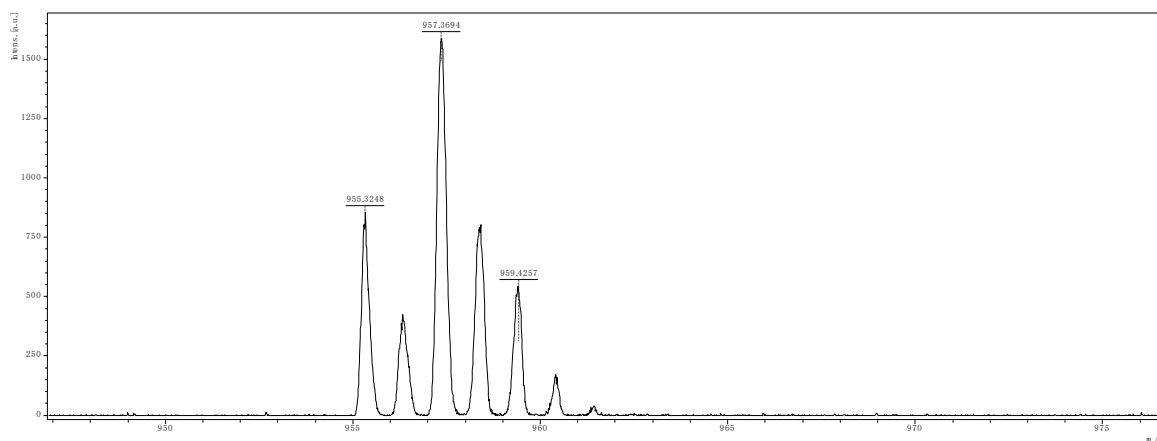

**Figure S26.** MALDI-TOF-MS of complex 3.

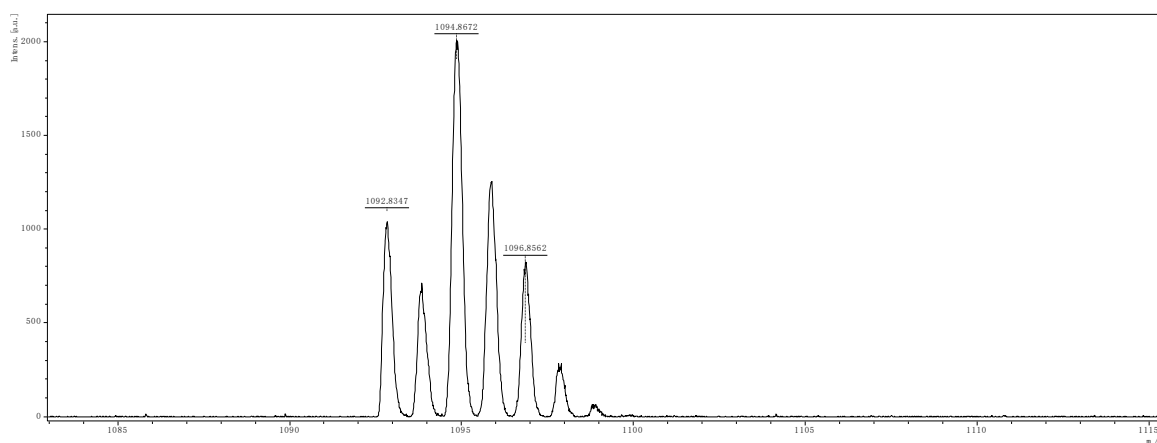

**Figure S27.** MALDI-TOF-MS of complex 4.

### 3.4 $^1\text{H}$ and $^{13}\text{C}$ NMR of polymer and copolymer.

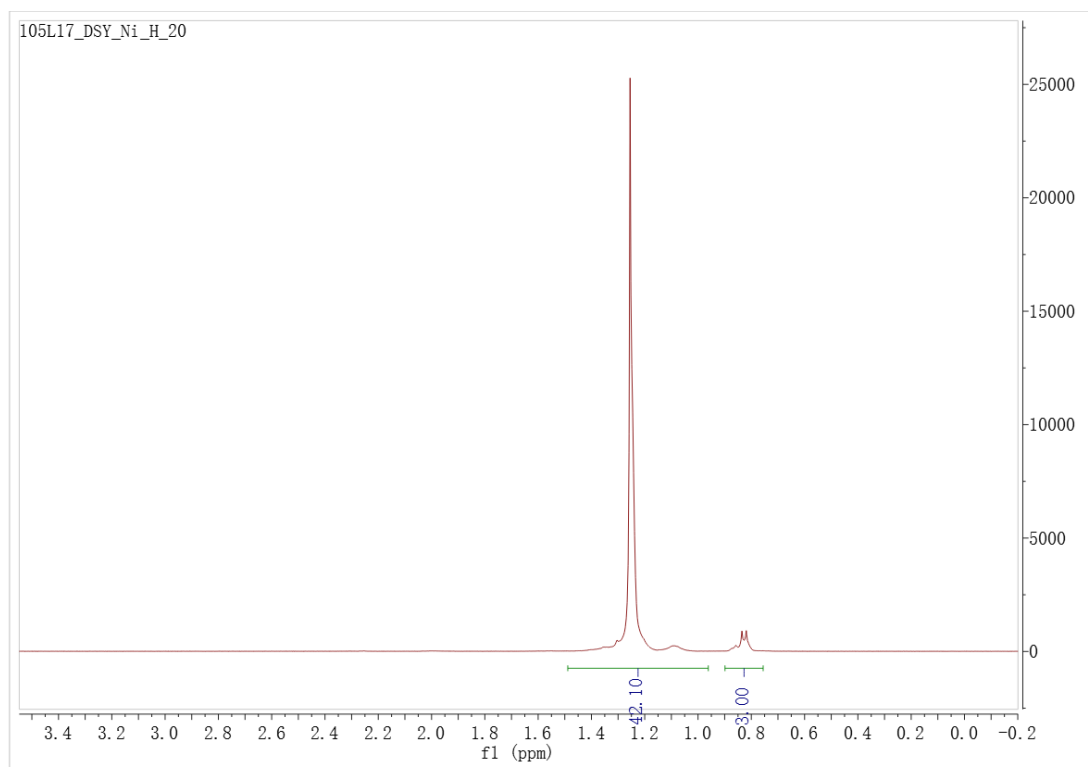

**Figure S28.**  $^1\text{H}$  NMR spectrum of the polymer from table 1, entry 1 ( $\text{CDCl}_2\text{CDCl}_2$ ,  $120^\circ\text{C}$ ).

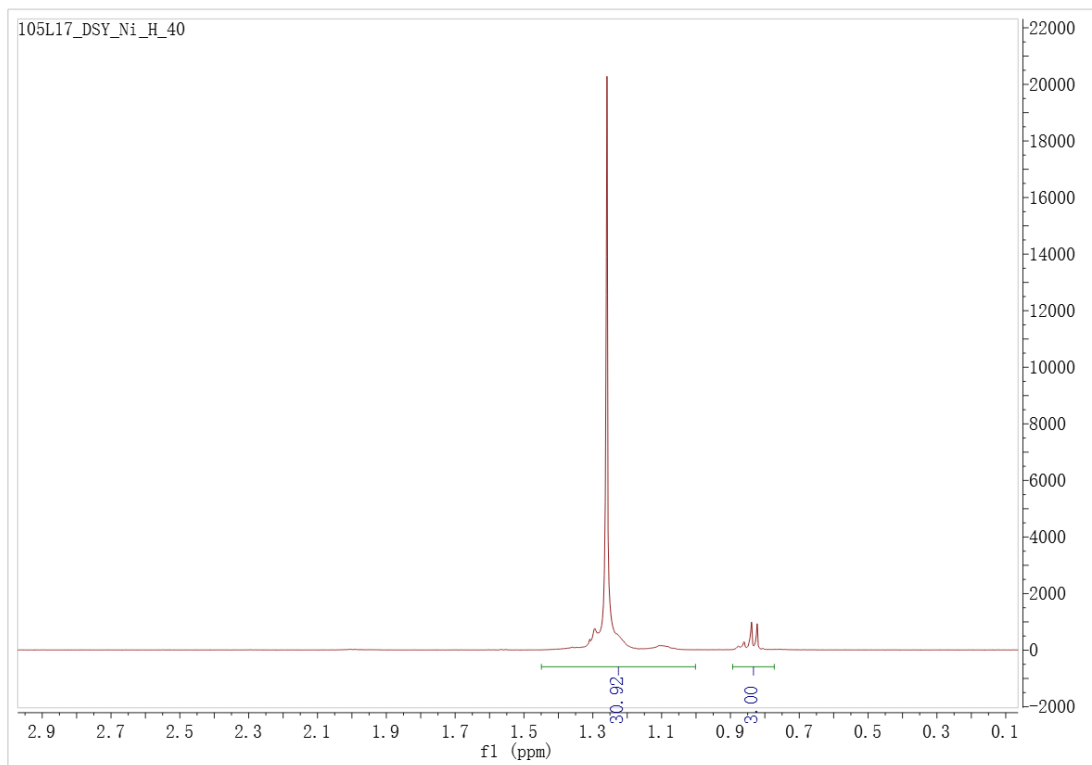

**Figure S29.**  $^1\text{H}$  NMR spectrum of the polymer from table 1, entry 2 ( $\text{CDCl}_2\text{CDCl}_2$ ,  $120^\circ\text{C}$ ).

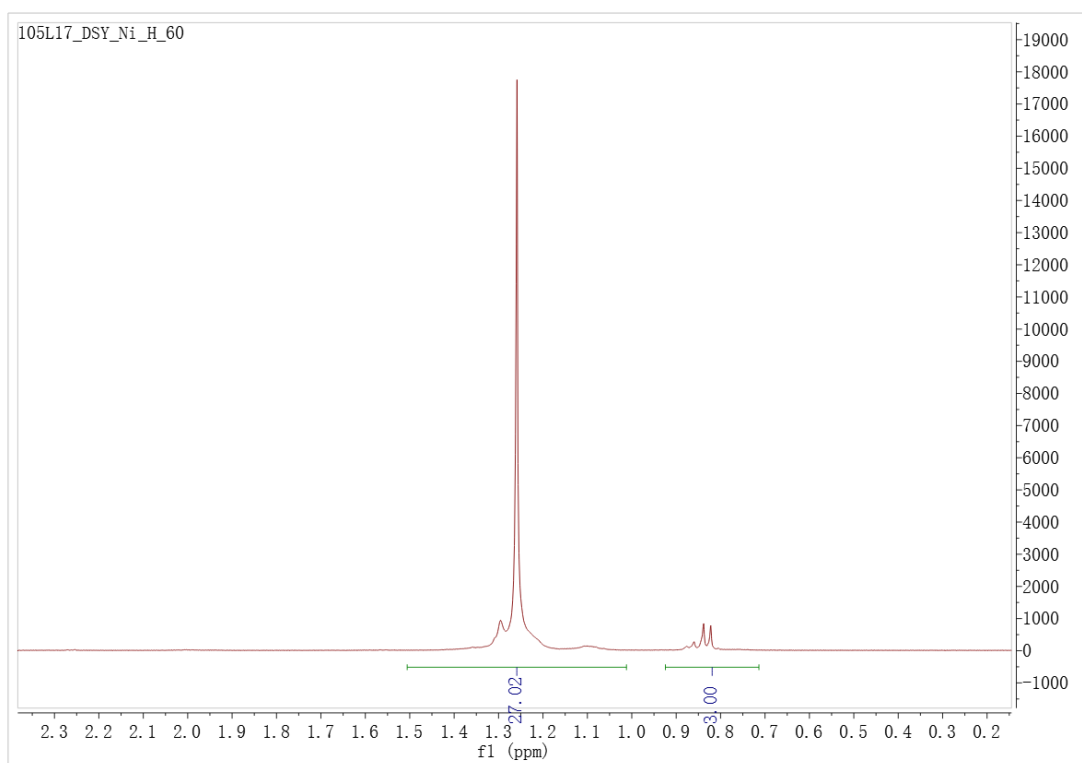

**Figure S30.**  $^1\text{H}$  NMR spectrum of the polymer from table 1, entry 3 ( $\text{CDCl}_2\text{CDCl}_2$ ,  $120^\circ\text{C}$ ).



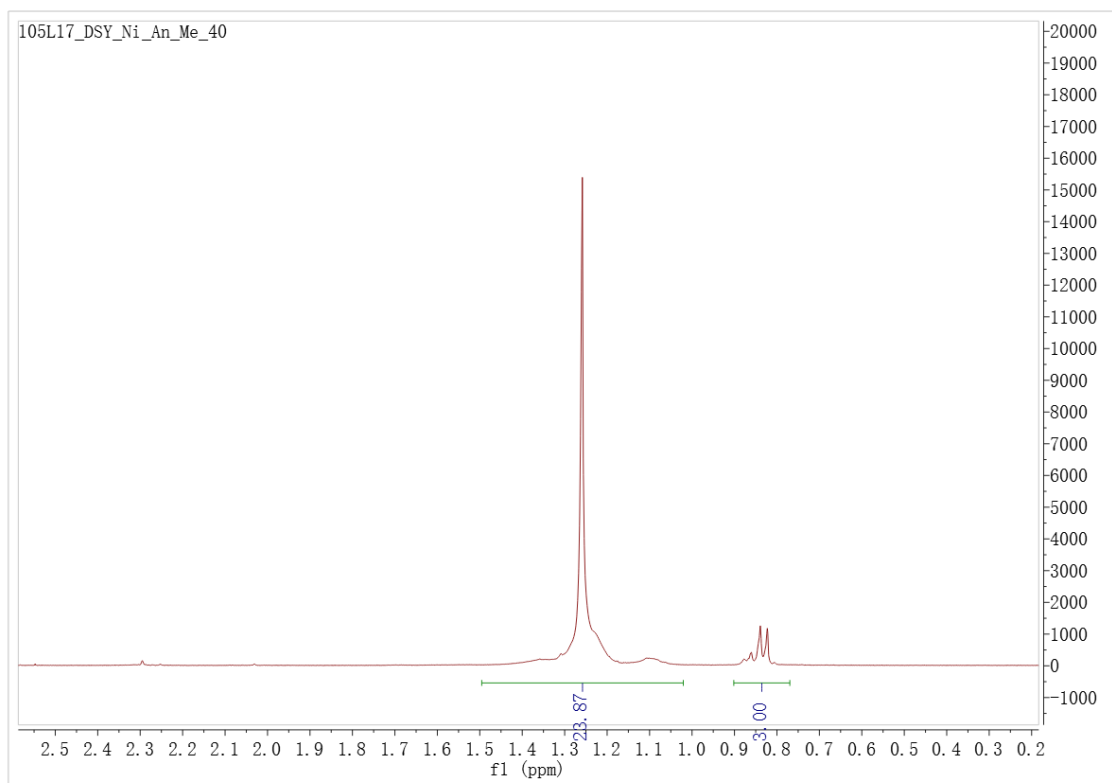

**Figure S31.**  $^1\text{H}$  NMR spectrum of the polymer from table 1, entry 6 ( $\text{CDCl}_2\text{CDCl}_2$ , 120  $^\circ\text{C}$ ).

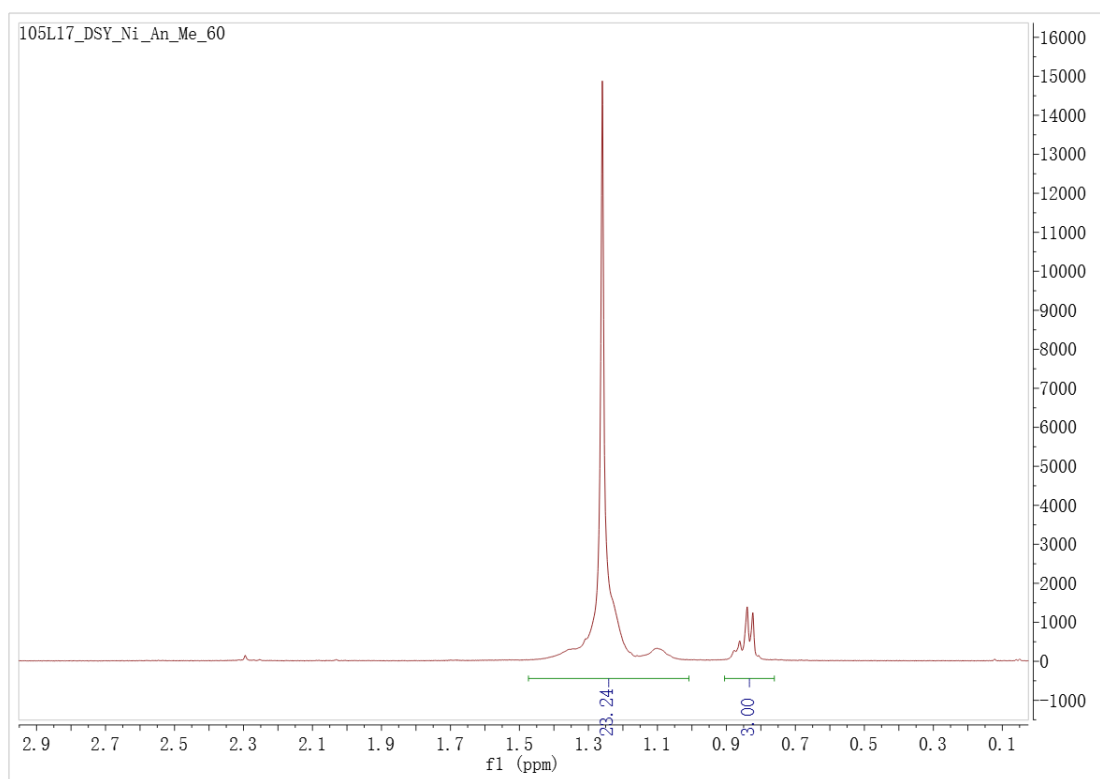

**Figure S32.**  $^1\text{H}$  NMR spectrum of the polymer from table 1, entry 7 ( $\text{CDCl}_2\text{CDCl}_2$ , 120  $^\circ\text{C}$ ).

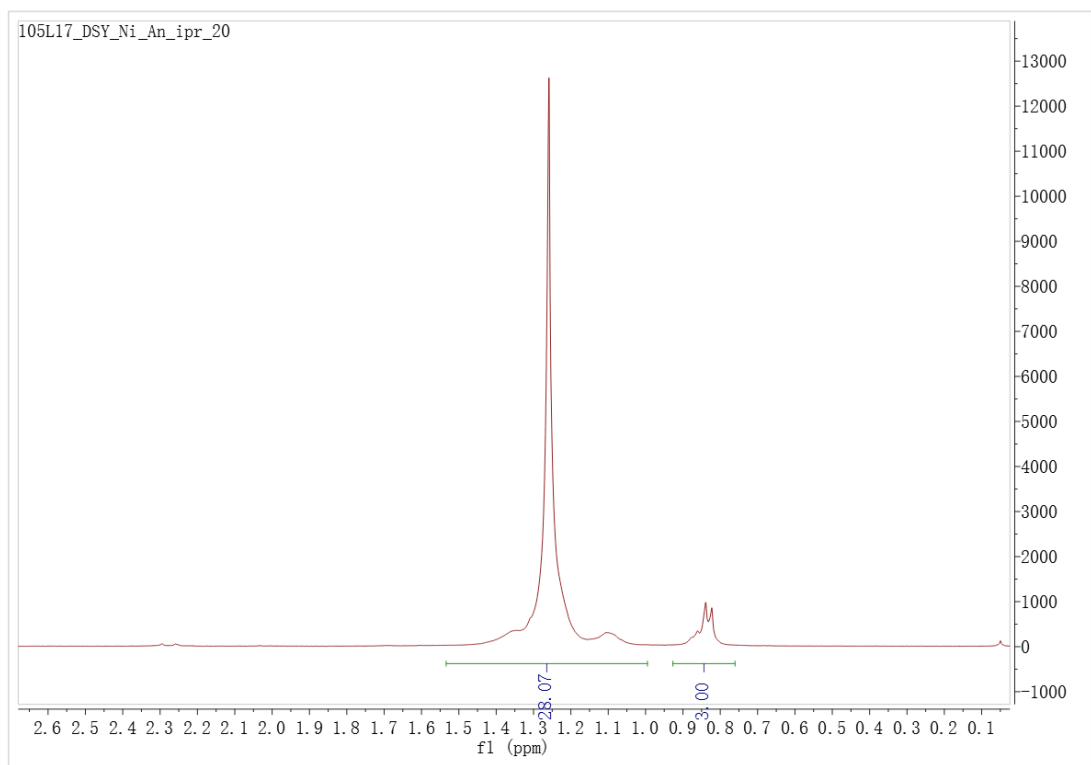

**Figure S33.**  $^1\text{H}$  NMR spectrum of the polymer from table 1, entry 9 ( $\text{CDCl}_2\text{CDCl}_2$ ,  $120^\circ\text{C}$ ).

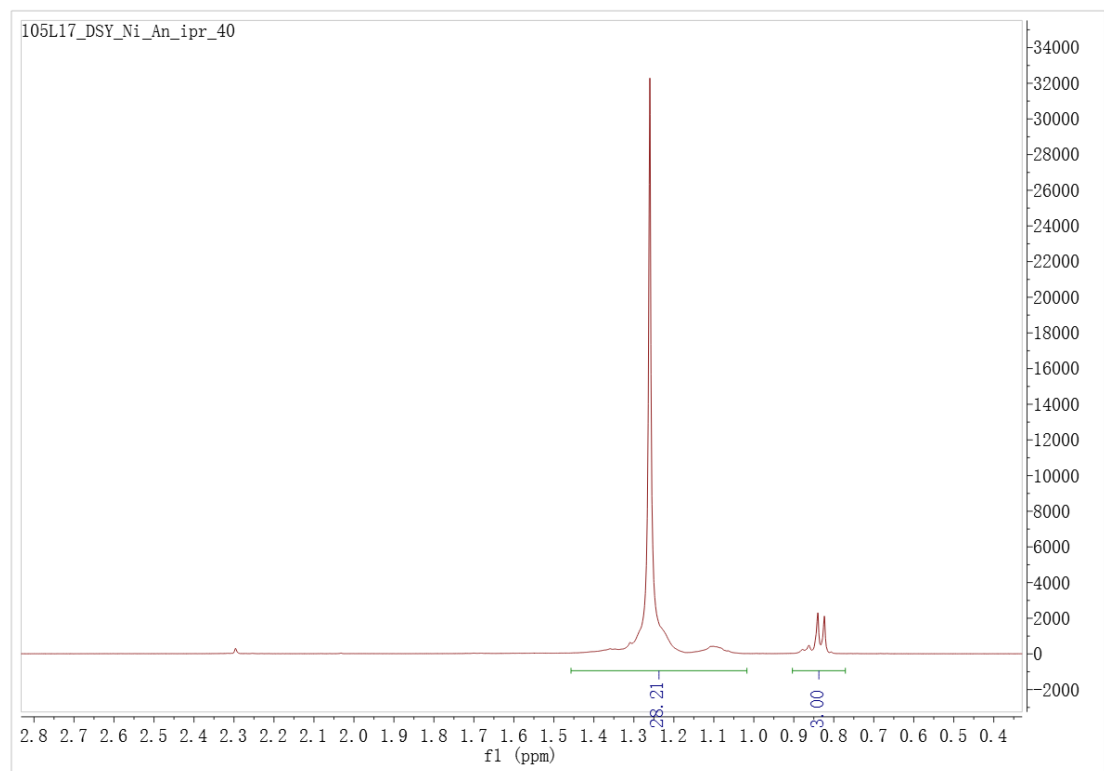

**Figure S34.**  $^1\text{H}$  NMR spectrum of the polymer from table 1, entry 10 ( $\text{CDCl}_2\text{CDCl}_2$ ,  $120^\circ\text{C}$ ).

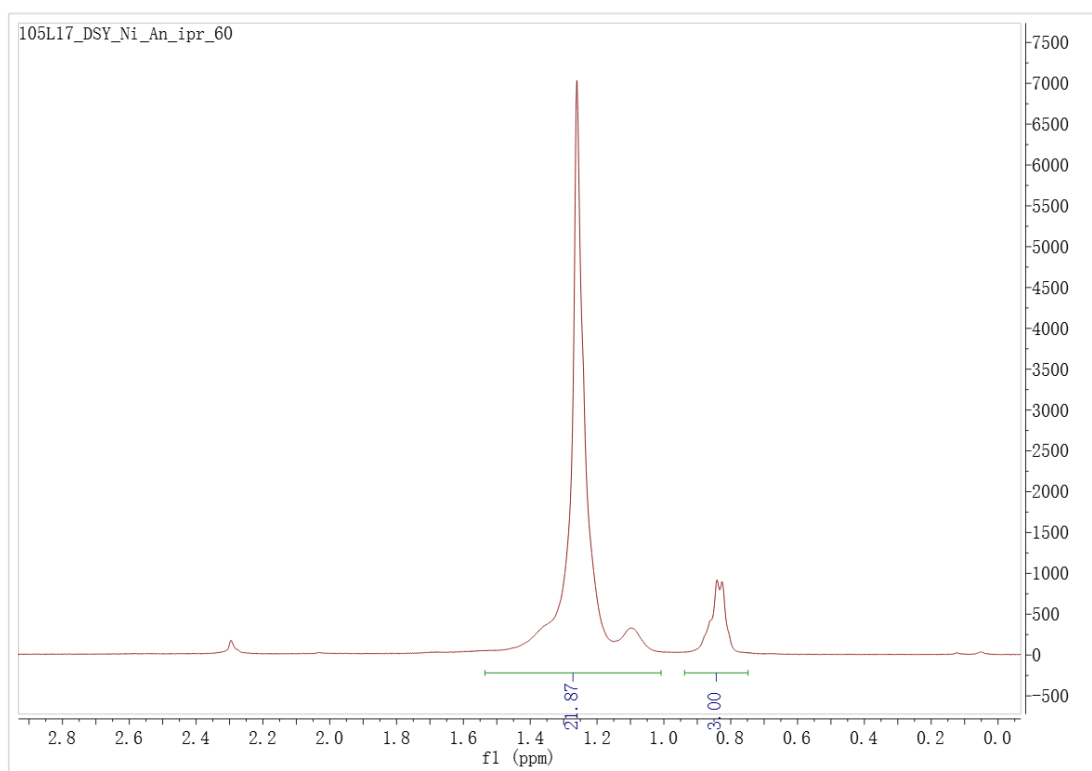

**Figure S35.**  $^1\text{H}$  NMR spectrum of the polymer from table 1, entry 11 ( $\text{CDCl}_2\text{CDCl}_2$ ,  $120^\circ\text{C}$ ).

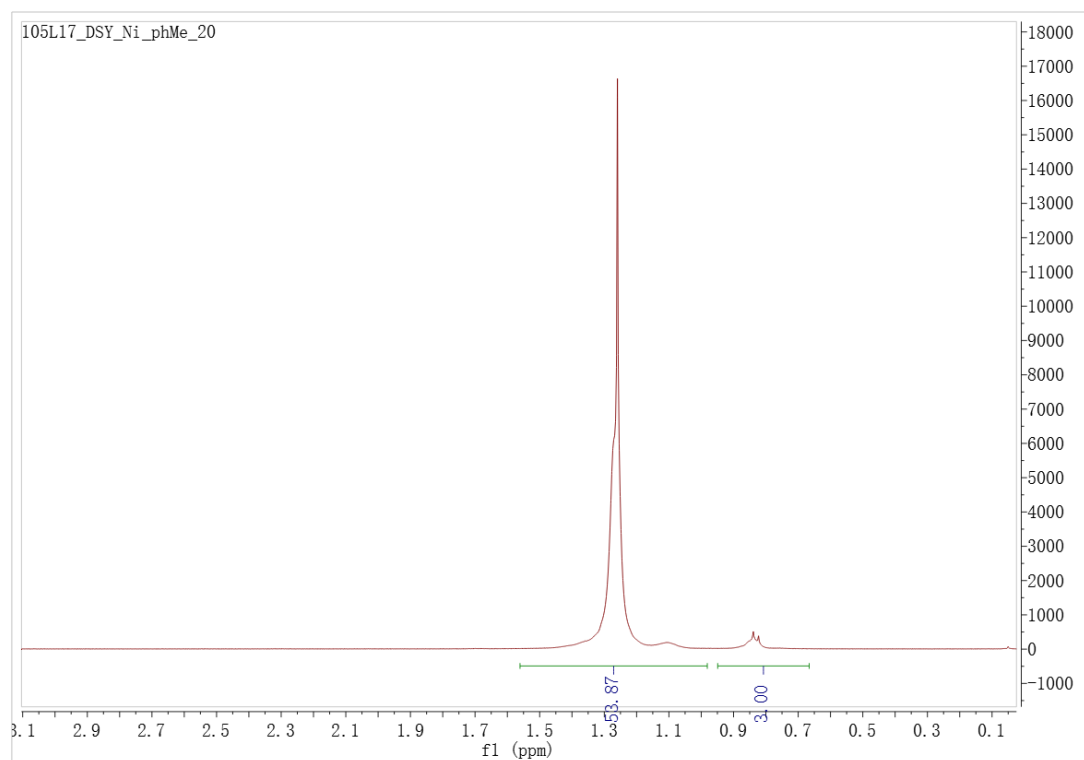

**Figure S36.**  $^1\text{H}$  NMR spectrum of the polymer from table 1, entry 13 ( $\text{CDCl}_2\text{CDCl}_2$ ,  $120^\circ\text{C}$ ).

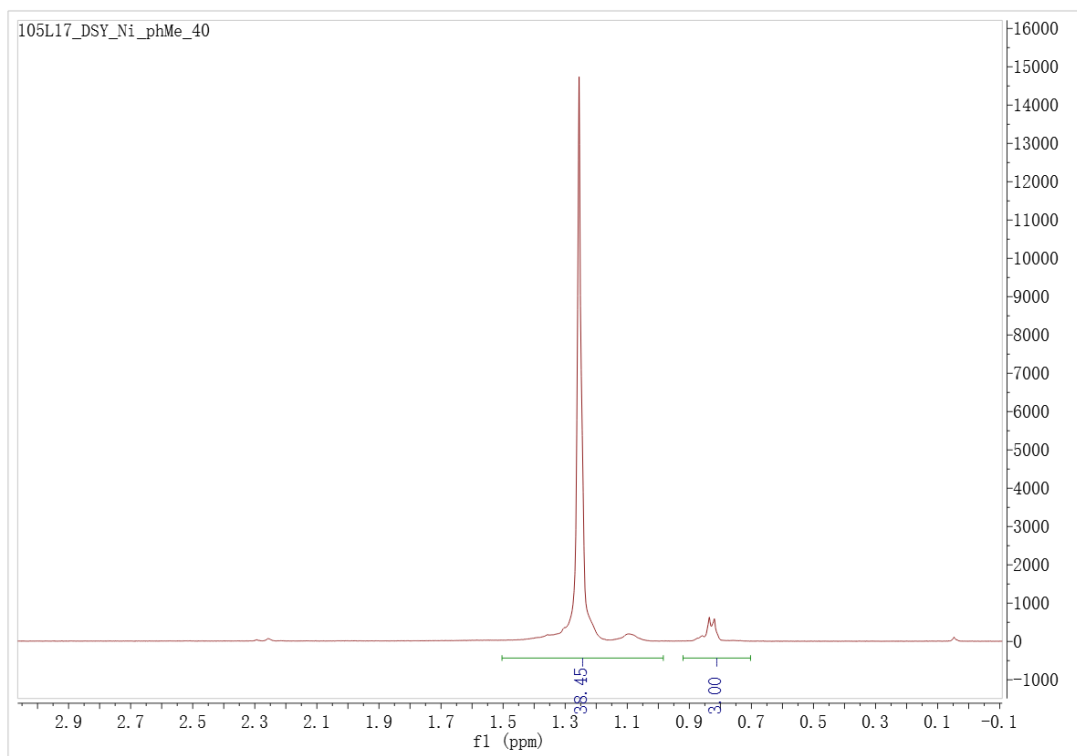

**Figure S37.**  $^1\text{H}$  NMR spectrum of the polymer from table 1, entry 14 ( $\text{CDCl}_2\text{CDCl}_2$ ,  $120^\circ\text{C}$ ).

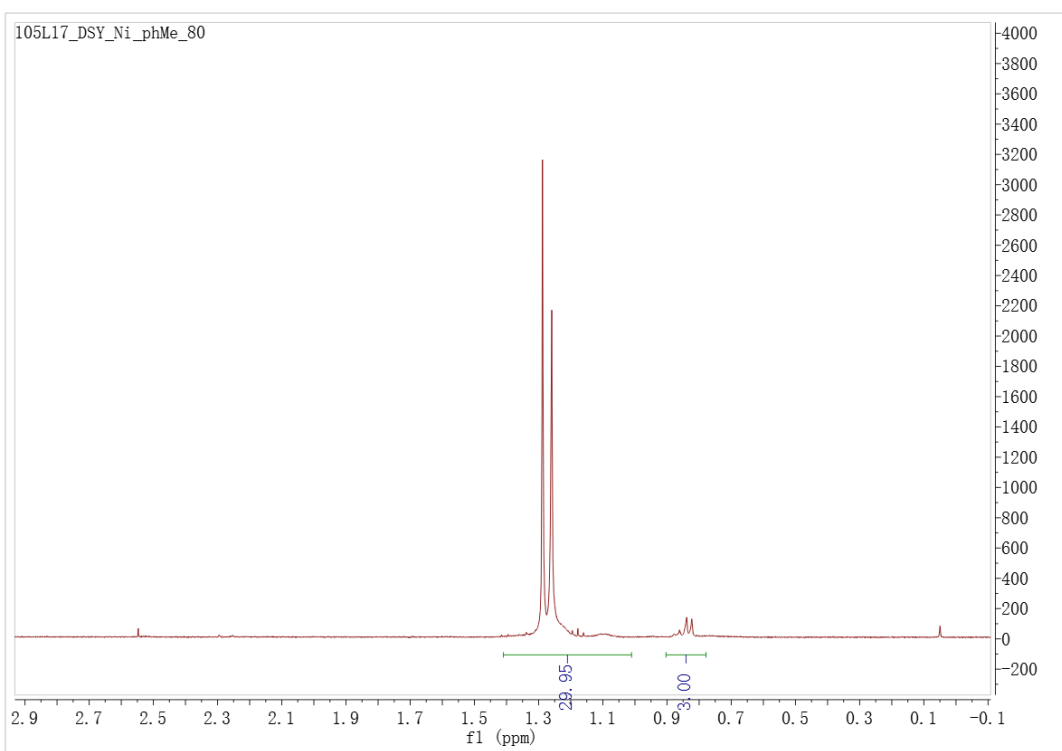

**Figure S38.**  $^1\text{H}$  NMR spectrum of the polymer from table 1, entry 16 ( $\text{CDCl}_2\text{CDCl}_2$ ,  $120^\circ\text{C}$ ).

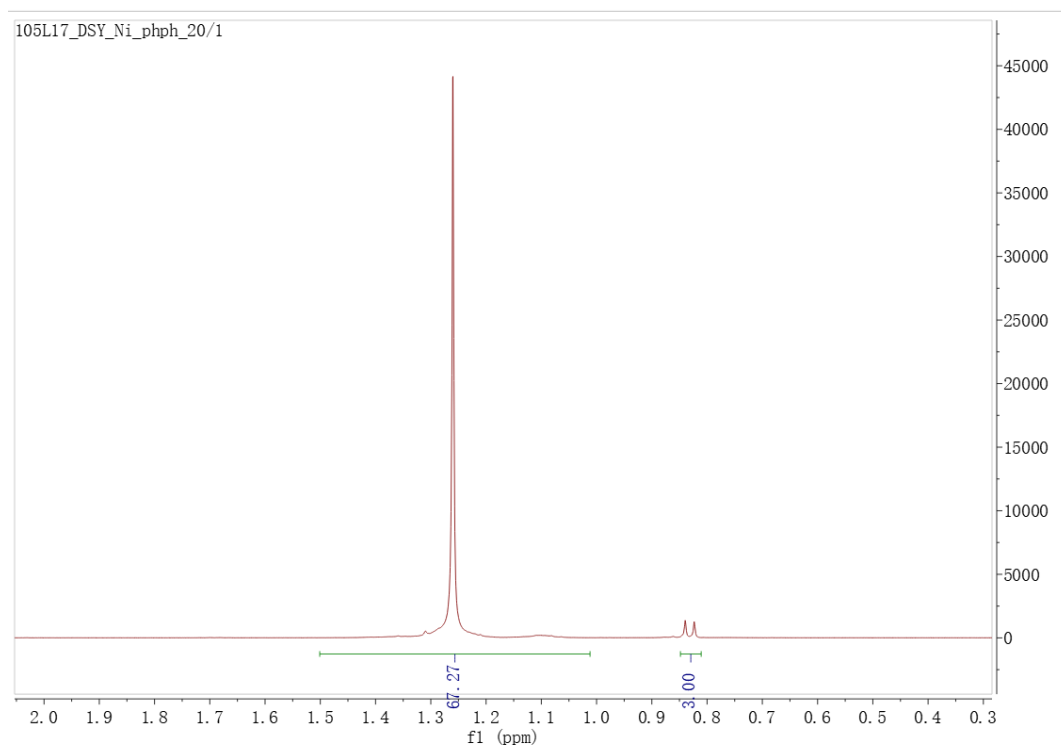

**Figure S39.**  $^1\text{H}$  NMR spectrum of the polymer from table 1, entry 17 ( $\text{CDCl}_2\text{CDCl}_2$ ,  $120^\circ\text{C}$ ).

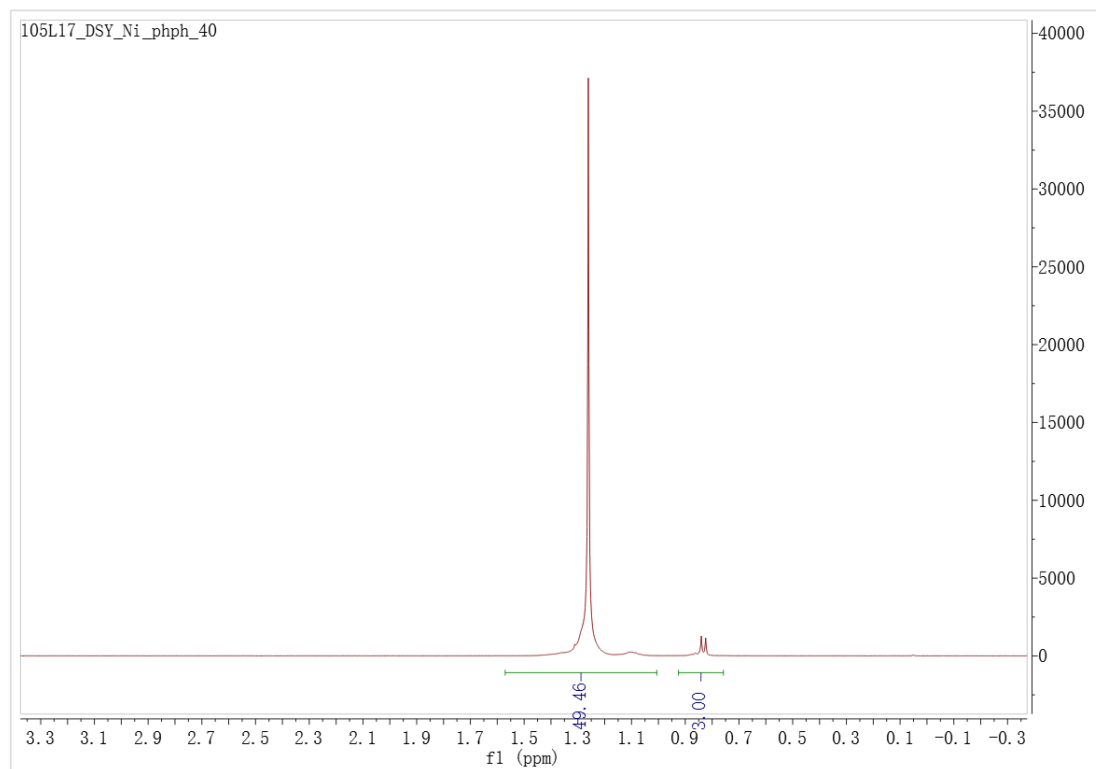

**Figure S40.**  $^1\text{H}$  NMR spectrum of the polymer from table 1, entry 18 ( $\text{CDCl}_2\text{CDCl}_2$ ,  $120^\circ\text{C}$ ).

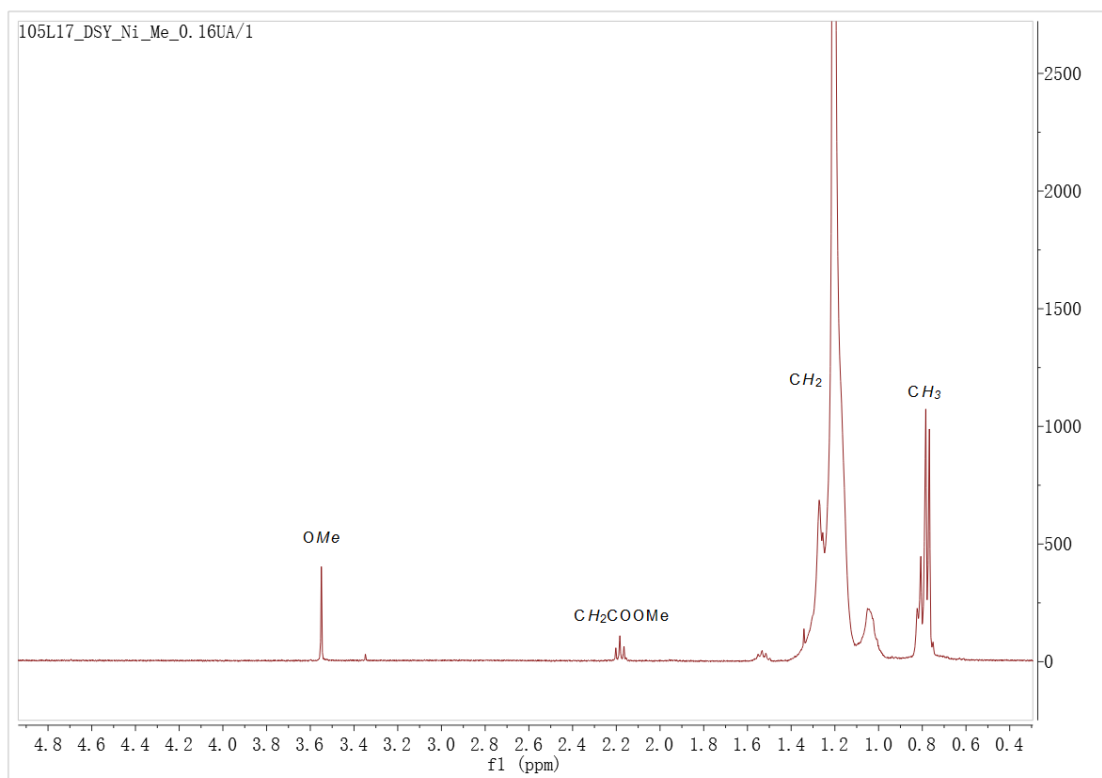

**Figure S41.** <sup>1</sup>H NMR spectrum of the polymer from table 3, entry 11 (CDCl<sub>2</sub>CDCl<sub>2</sub>, 120 °C).

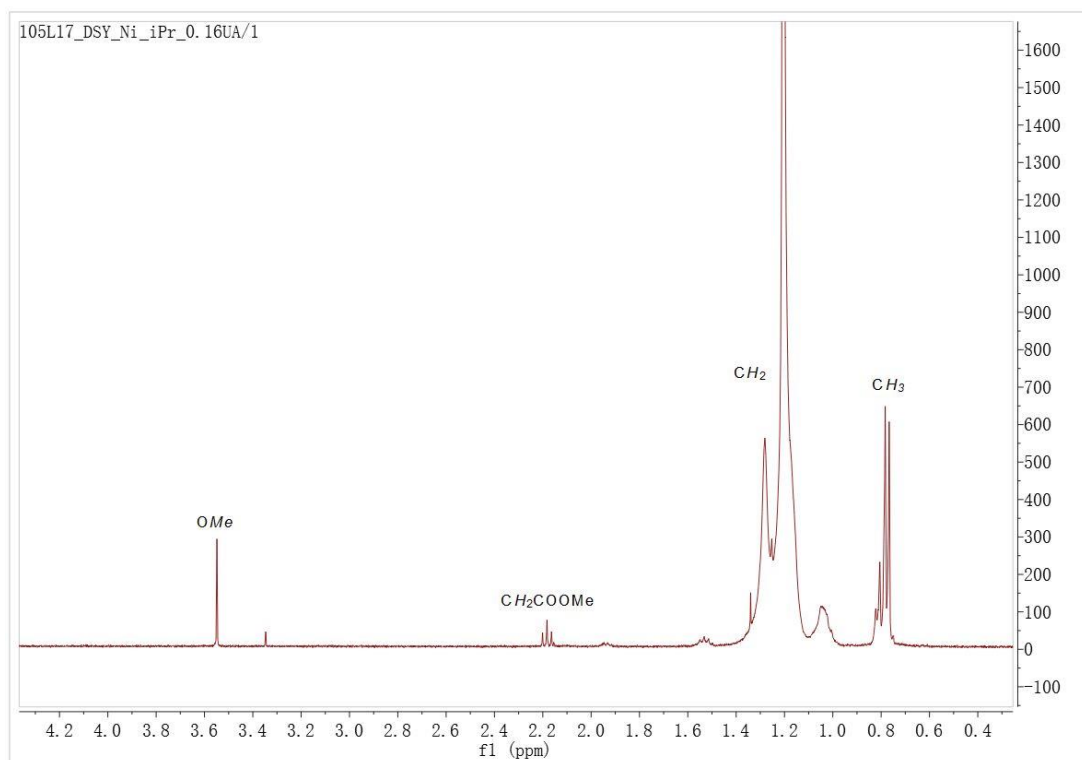

**Figure S42.** <sup>1</sup>H NMR spectrum of the polymer from table 3, entry 12 (CDCl<sub>2</sub>CDCl<sub>2</sub>, 120 °C).

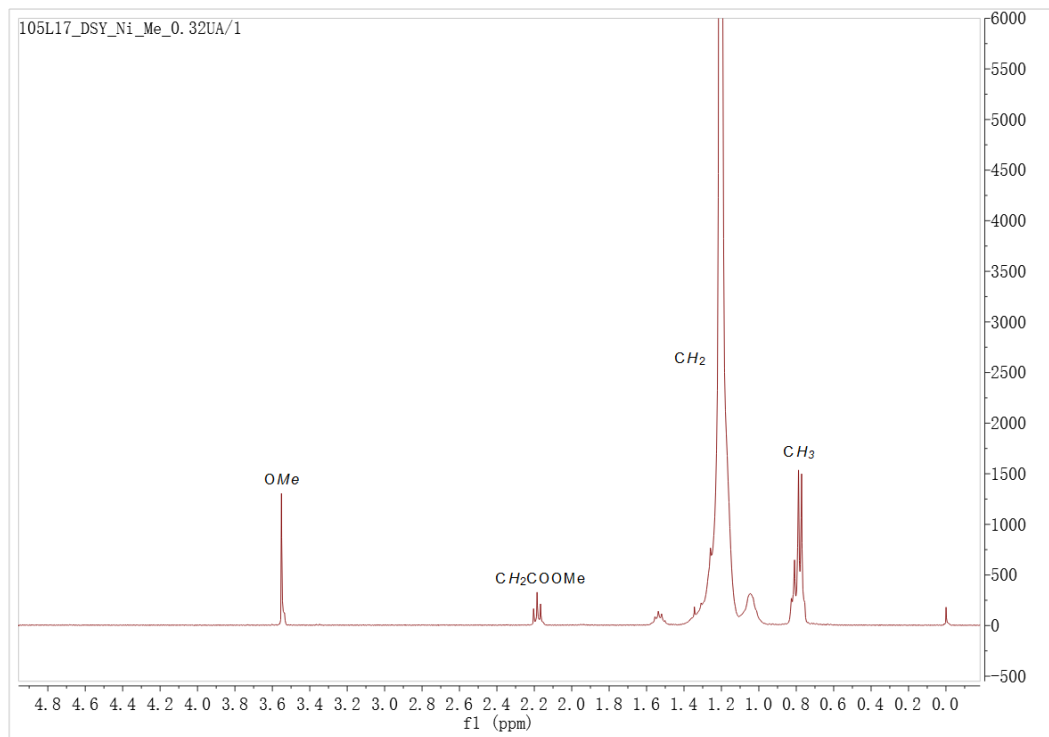

**Figure S43.** <sup>1</sup>H NMR spectrum of the polymer from table 3, entry 14 (CDCl<sub>2</sub>CDCl<sub>2</sub>, 120 °C).

### 3.5 DSC, GPC of polymer and copolymer.

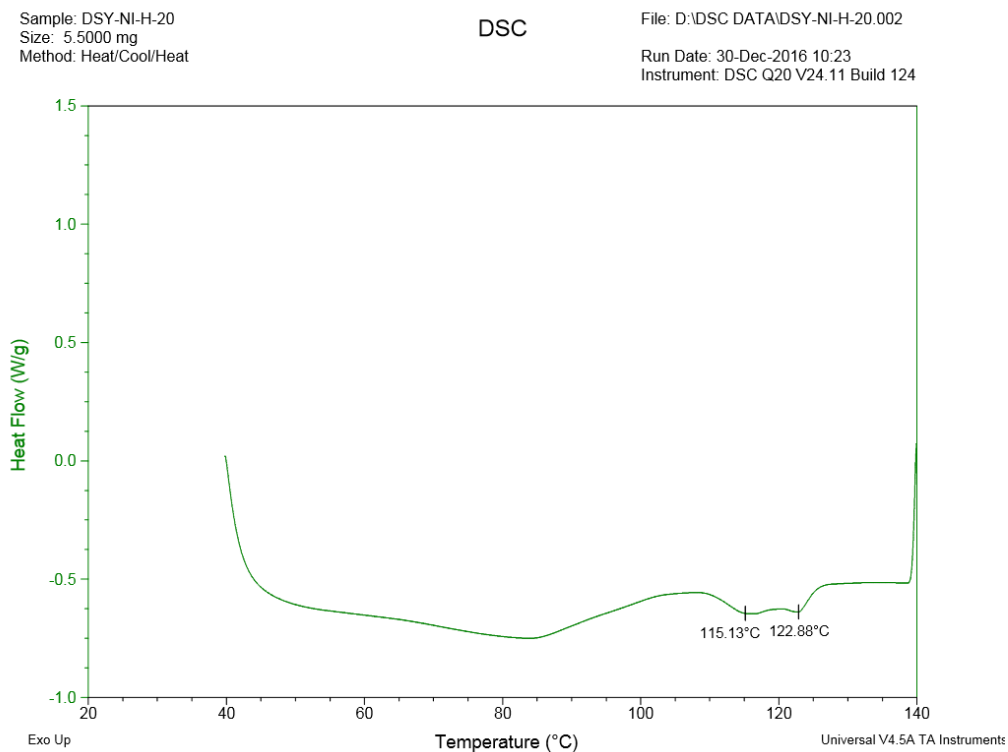

**Figure S44.** DSC of the polymer from table 1, entry 1.

Sample: DSY-NI-H-40  
Size: 5.5000 mg  
Method: Heat/Cool/Heat

DSC

File: D:\DSC DATA\DSY\DSY-NI-H-40.001

Run Date: 30-Dec-2016 13:23  
Instrument: DSC Q20 V24.11 Build 124

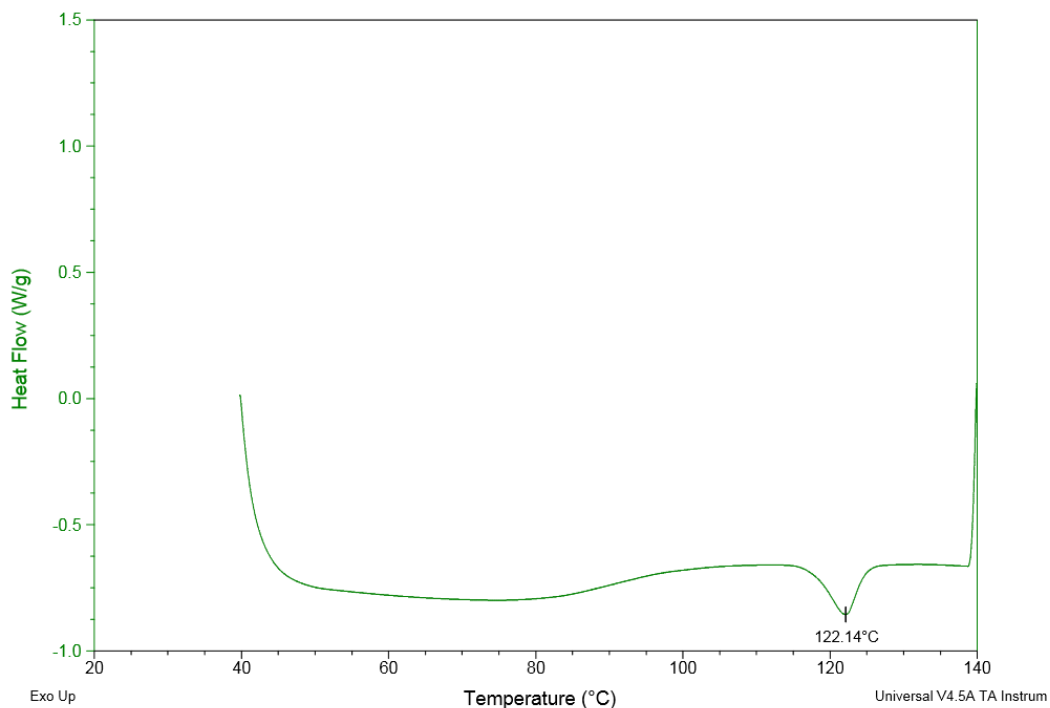

Figure S45. DSC of the polymer from table 1, entry 2.

Sample: DSY-NI-H-60  
Size: 5.5000 mg  
Method: Heat/Cool/Heat

DSC

File: D:\DSC DATA\DSY\DSY-NI-H-60.001

Run Date: 30-Dec-2016 15:40  
Instrument: DSC Q20 V24.11 Build 124

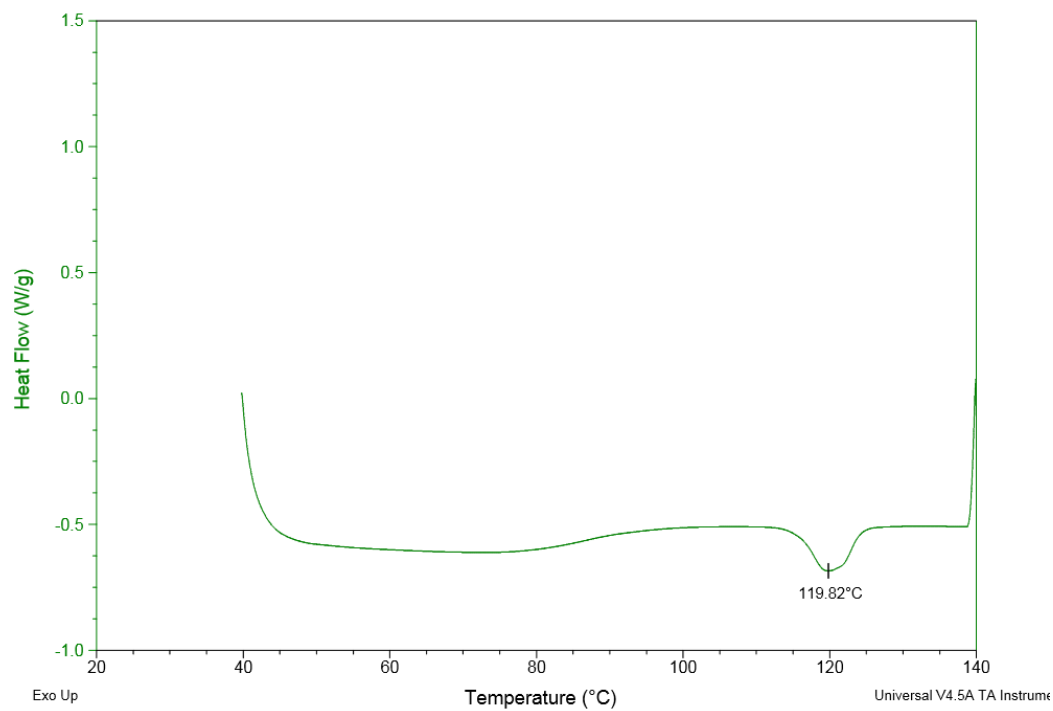

Figure S46. DSC of the polymer from table 1, entry 3.



Sample: DSY-NI-H-80  
Size: 5.5000 mg  
Method: Heat/Cool/Heat

DSC

File: D:\DSC DATA\DSY\DSY-NI-H-80.001

Run Date: 30-Dec-2016 16:30  
Instrument: DSC Q20 V24.11 Build 124

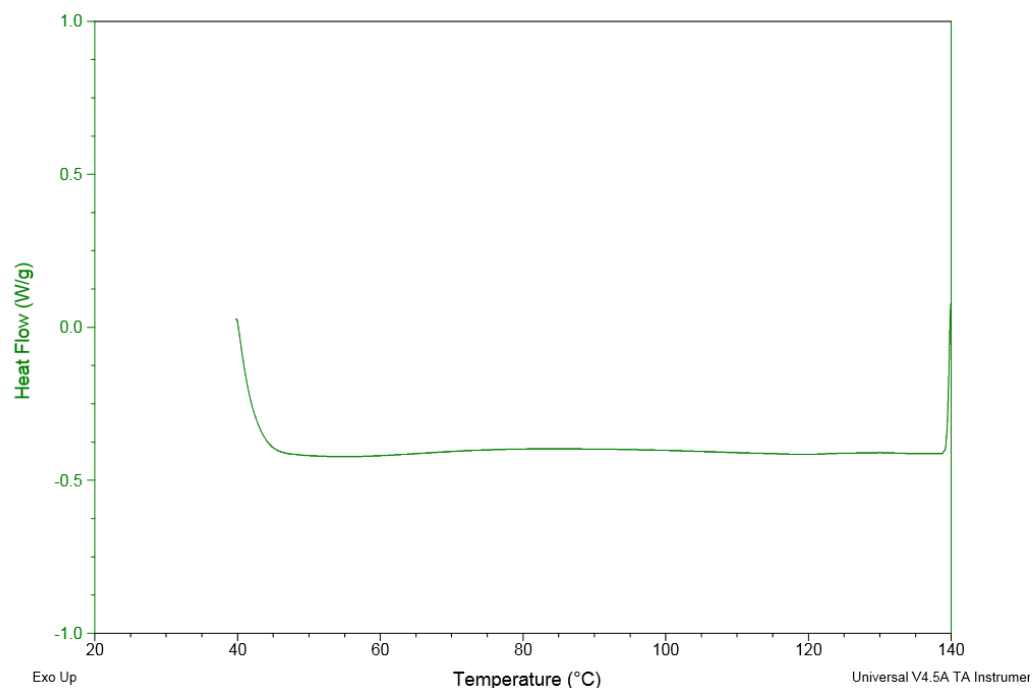

Figure S47. DSC of the polymer from table 1, entry 4.

Sample: DSY-NI-ME-20  
Size: 7.5000 mg  
Method: Heat/Cool/Heat

DSC

File: D:\DSC DATA\DSY\DSY-NI-ME-20.001

Run Date: 30-Dec-2016 18:34  
Instrument: DSC Q20 V24.11 Build 124

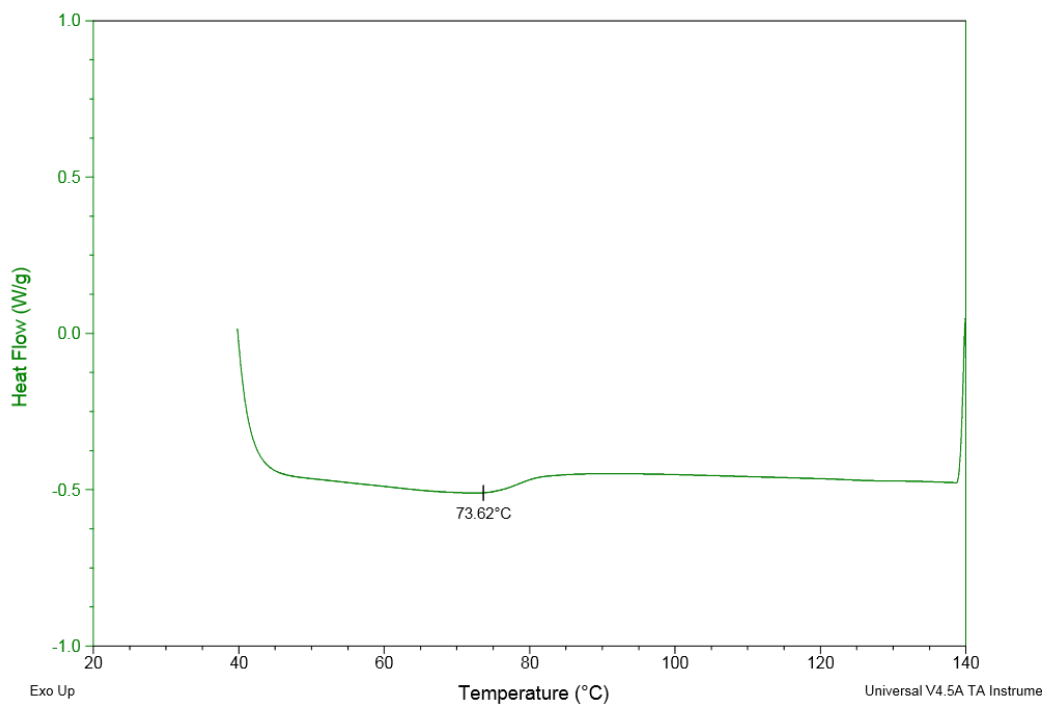

Figure S48. DSC of the polymer from table 1, entry 5.

Sample: dsy-Ni-Me-40  
Size: 5.6900 mg

DSC

File: E:\dsy-Ni-Me-40.txt  
Operator: ding  
Run Date: 28-Dec-2016 18:41  
Instrument: DSC Q2000 V24.10 Build 122

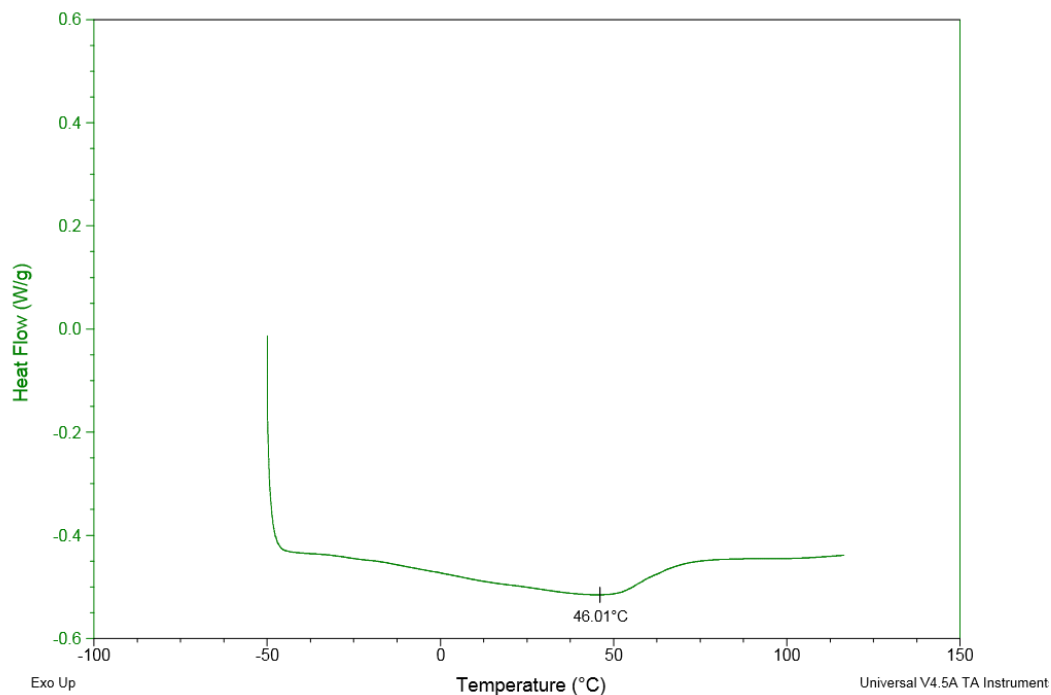

Figure S49. DSC of the polymer from table 1, entry 6.

Sample: dsy-Ni-Me-60  
Size: 4.9400 mg

DSC

File: E:\dsy-Ni-Me-60.txt  
Operator: ding  
Run Date: 28-Dec-2016 23:40  
Instrument: DSC Q2000 V24.10 Build 122

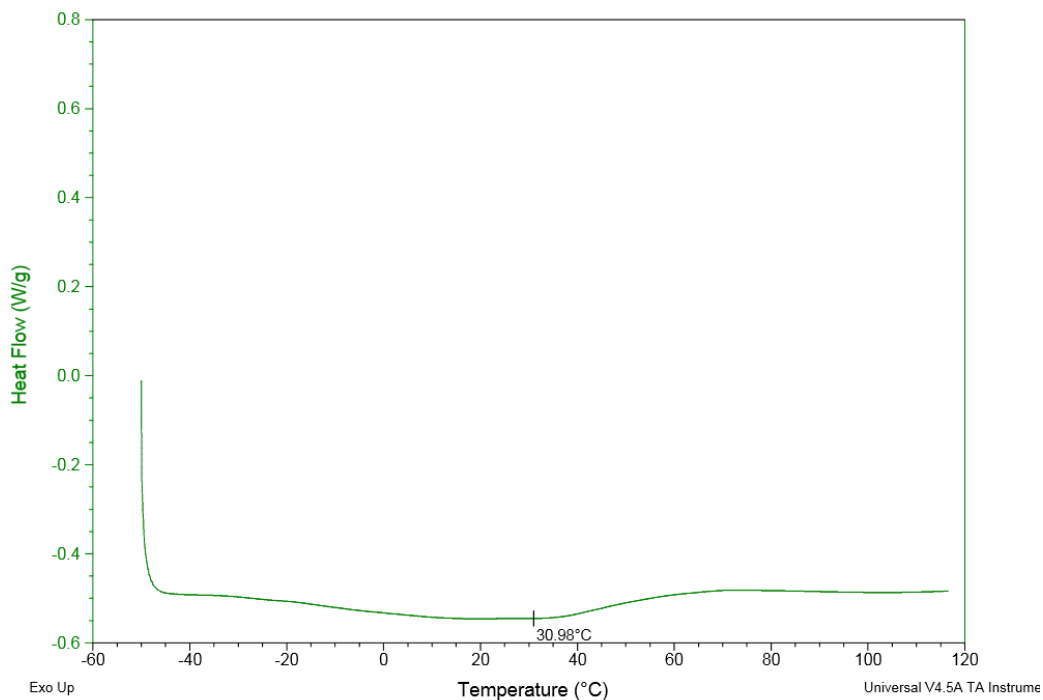

Figure S50. DSC of the polymer from table 1, entry 7.

Sample: dsy-Ni-*ipr*-20  
Size: 9.8400 mg

DSC

File: E:\dsy-Ni-*ipr*-20.txt  
Operator: ding  
Run Date: 28-Dec-2016 22:25  
Instrument: DSC Q2000 V24.10 Build 122

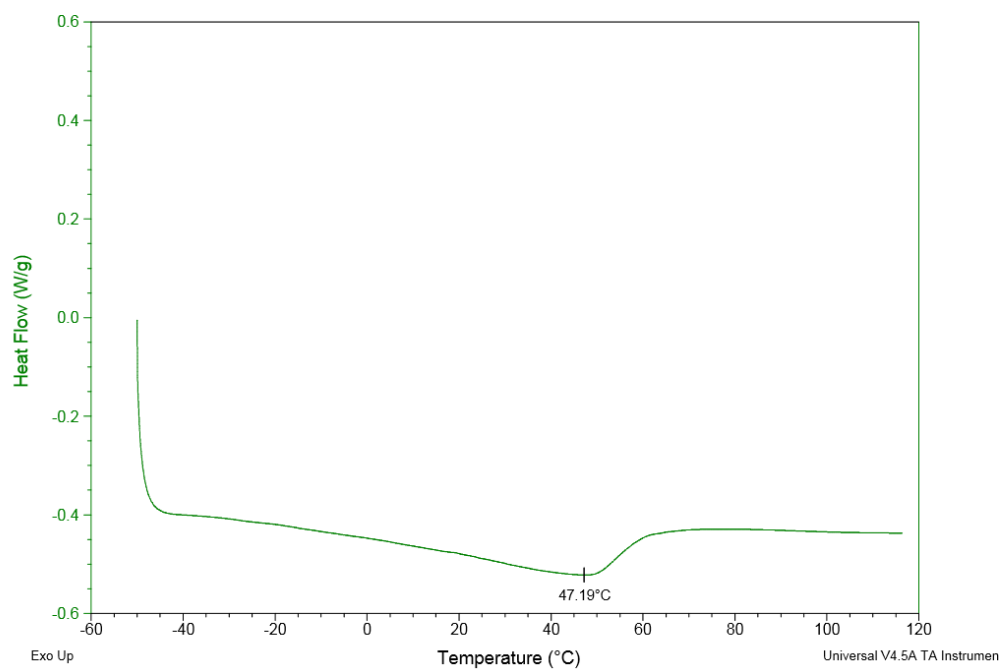

**Figure S51.** DSC of the polymer from table 1, entry 9.

Sample: dsy-Ni-*ipr*-40  
Size: 7.1000 mg

DSC

File: E:\dsy-Ni-*ipr*-40.txt  
Operator: ding  
Run Date: 29-Dec-2016 00:55  
Instrument: DSC Q2000 V24.10 Build 122

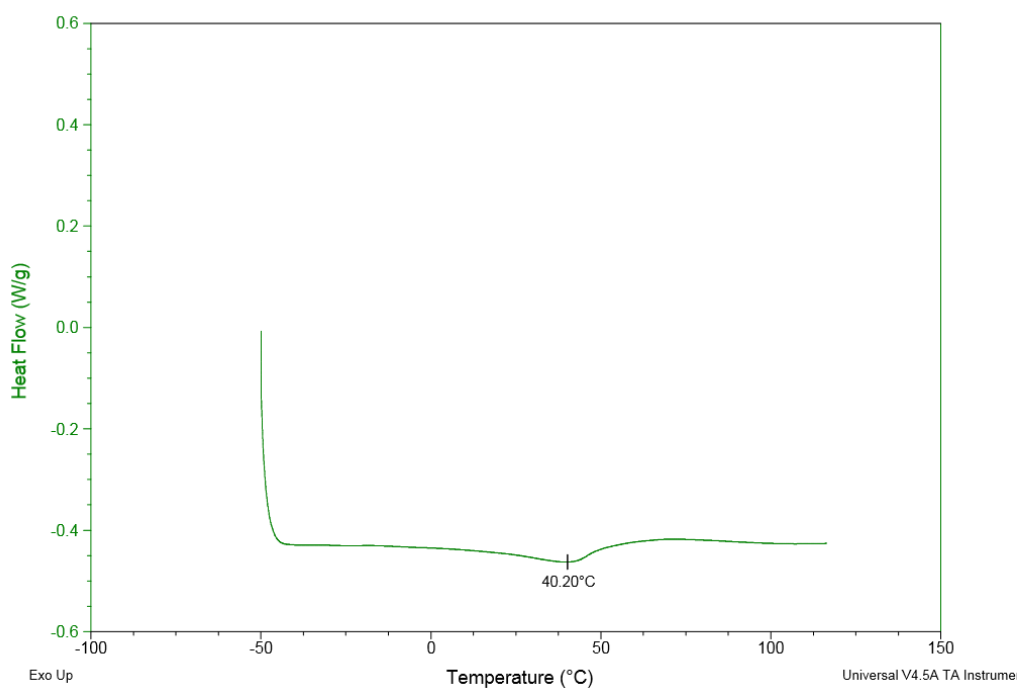

**Figure S52.** DSC of the polymer from table 1, entry 10.

Sample: dsy-Ni-*ipr*-60  
Size: 7.2900 mg

DSC

File: E:\dsy-Ni-*ipr*-60.txt  
Operator: ding  
Run Date: 28-Dec-2016 19:55  
Instrument: DSC Q2000 V24.10 Build 122

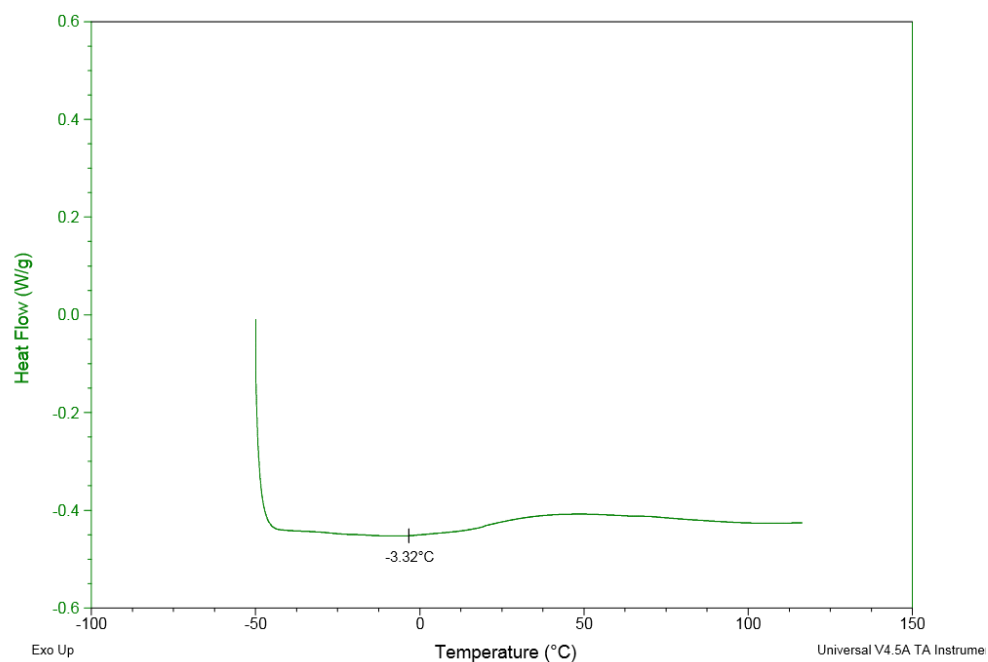

**Figure S53.** DSC of the polymer from table 1, entry 11.

Sample: dsy-Ni-*ipr*-80  
Size: 7.4300 mg

DSC

File: E:\dsy-Ni-*ipr*-80.txt  
Operator: ding  
Run Date: 29-Dec-2016 02:09  
Instrument: DSC Q2000 V24.10 Build 122

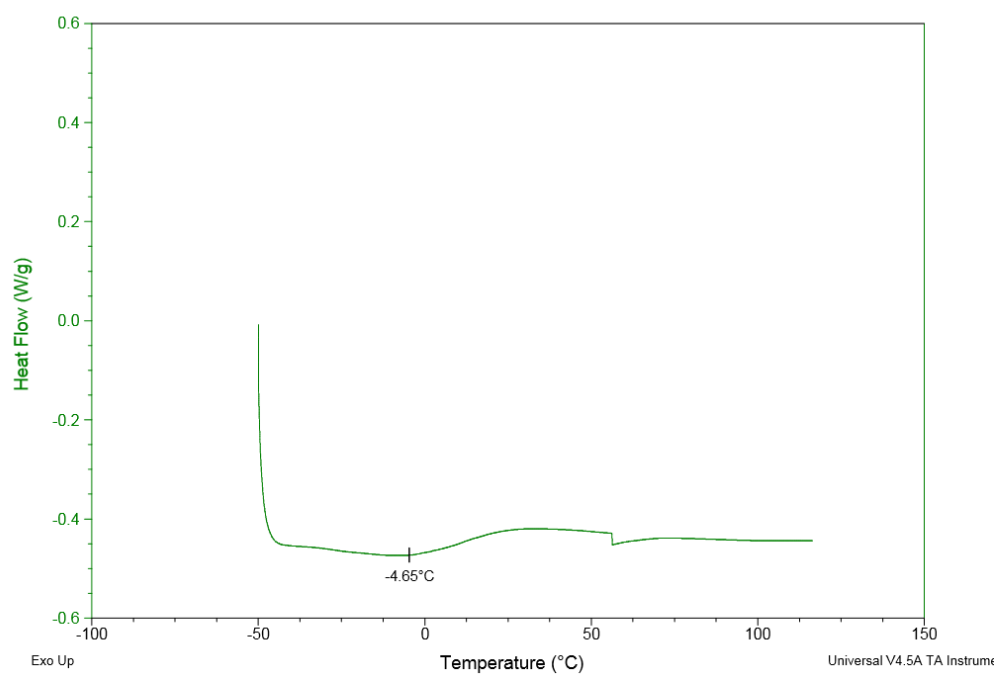

**Figure S54.** DSC of the polymer from table 1, entry 12.

Sample: dsy-Ni-Meph-60  
Size: 7.3300 mg

DSC

File: E:\dsy-Ni-Meph-60.txt  
Operator: ding  
Run Date: 28-Dec-2016 16:11  
Instrument: DSC Q2000 V24.10 Build 122

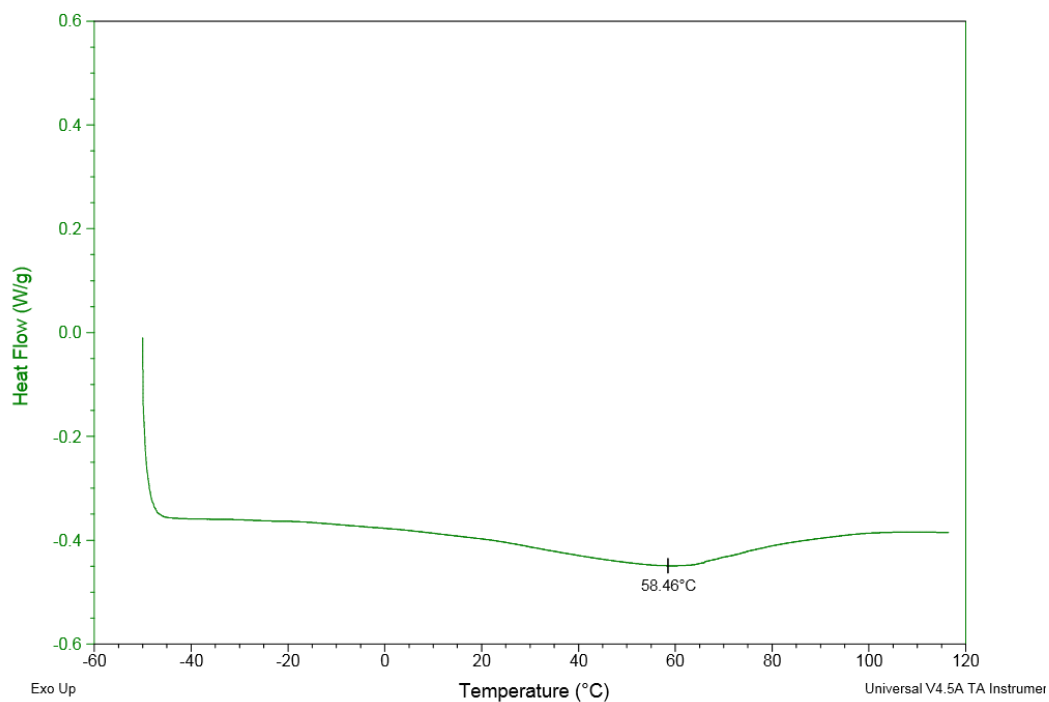

Figure S55. DSC of the polymer from table 1, entry 15.

Sample: dsy-Ni-Meph-80  
Size: 7.0700 mg

DSC

File: E:\dsy-Ni-Meph-80.txt  
Operator: ding  
Run Date: 28-Dec-2016 21:10  
Instrument: DSC Q2000 V24.10 Build 122

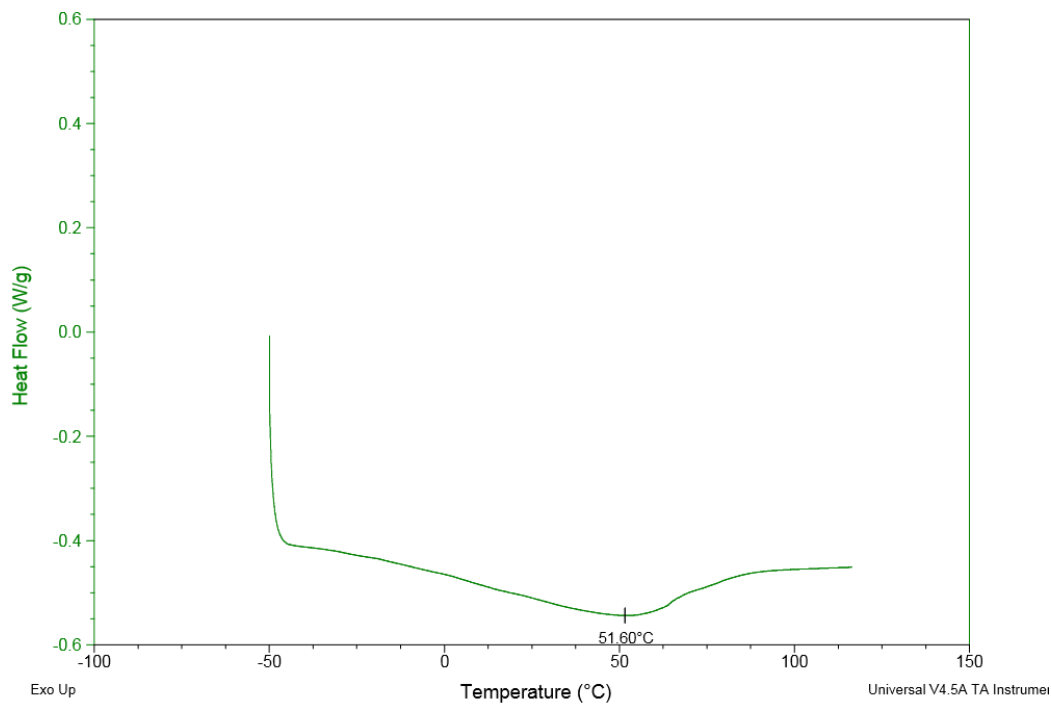

Figure S56. DSC of the polymer from table 1, entry 16.

Sample: KB-Ph-20  
Size: 5.2000 mg  
Method: Cell constant calibration

DSC

File: D:\DSC DATA\DSY\kb\KB-Ph-20.001  
Operator: Jeremy  
Run Date: 17-Aug-2017 15:32  
Instrument: DSC Q20 V24.11 Build 124

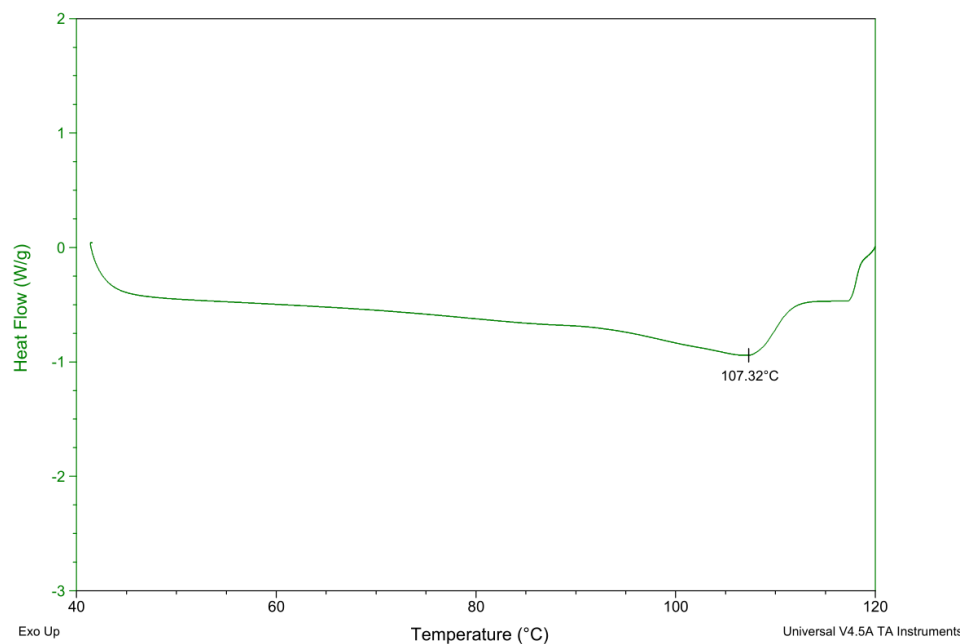

**Figure S57.** DSC of the polymer from table 1, entry 17.

Sample: DSY-NI-PHPH-40  
Size: 4.5000 mg  
Method: Heat/Cool/Heat

DSC

File: D:\DSC DATA\DSY\DSY-NI-PHPH-40.001  
Run Date: 31-Dec-2016 19:24  
Instrument: DSC Q20 V24.11 Build 124

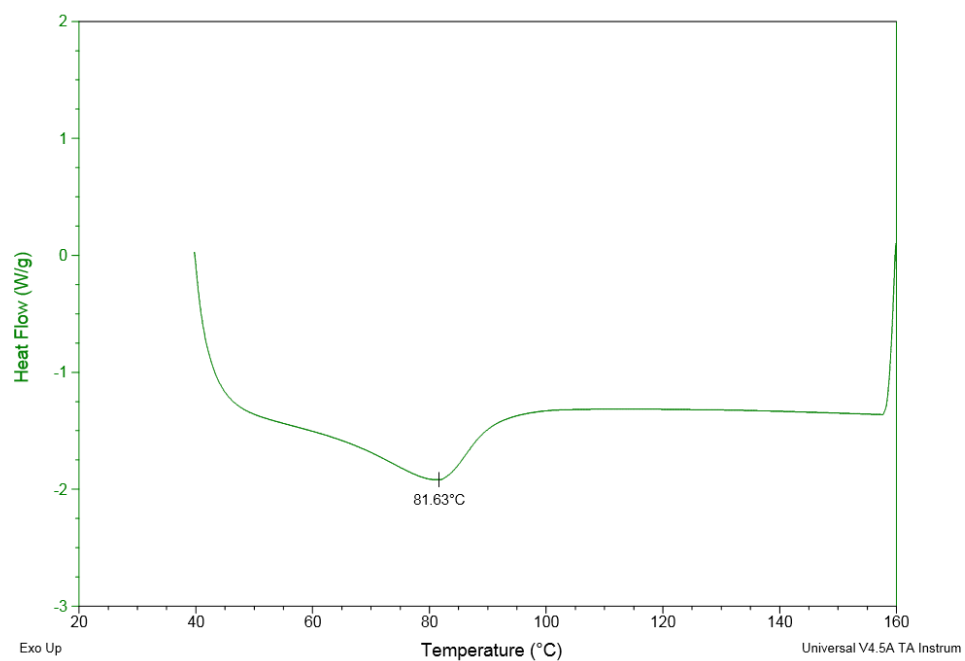

**Figure S58.** DSC of the polymer from table 1, entry 18.

Sample: DSY-NI-PHPH-60  
Size: 5.4000 mg  
Method: Heat/Cool/Heat

DSC

File: D:\DSC DATA\DSY\DSY-NI-PHPH-60.002

Run Date: 02-Jan-2017 16:28  
Instrument: DSC Q20 V24.11 Build 124

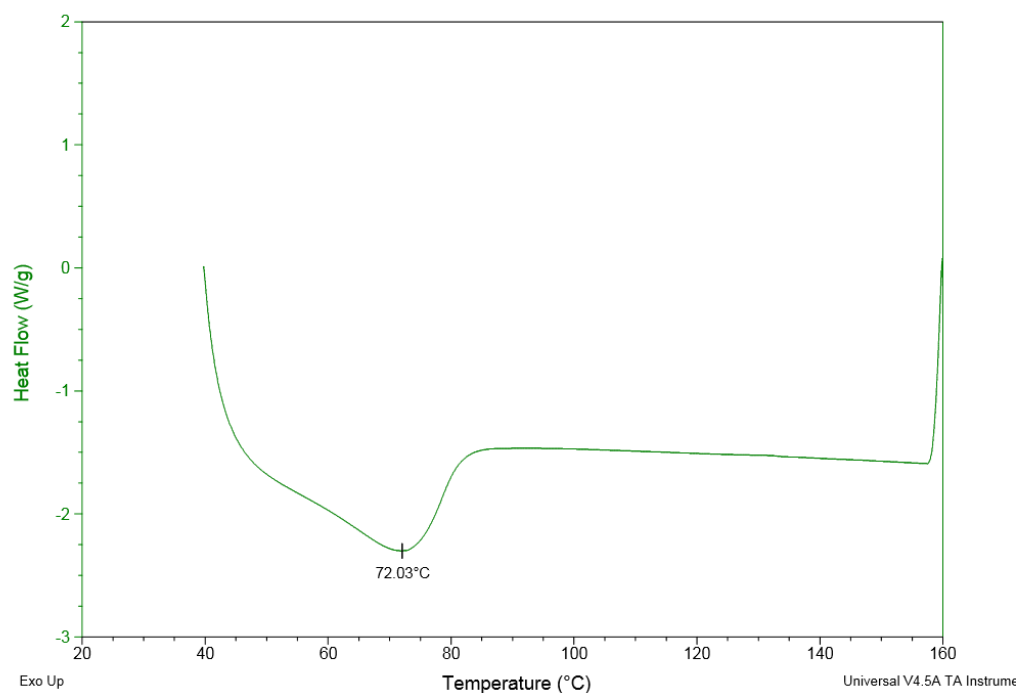

**Figure S59.** DSC of the polymer from table 1, entry 19.

Sample: dsy-Ni-Phph-80  
Size: 5.6100 mg

DSC

File: E:\dsy-Ni-Phph-80.txt  
Operator: ding  
Run Date: 28-Dec-2016 17:26  
Instrument: DSC Q2000 V24.10 Build 122

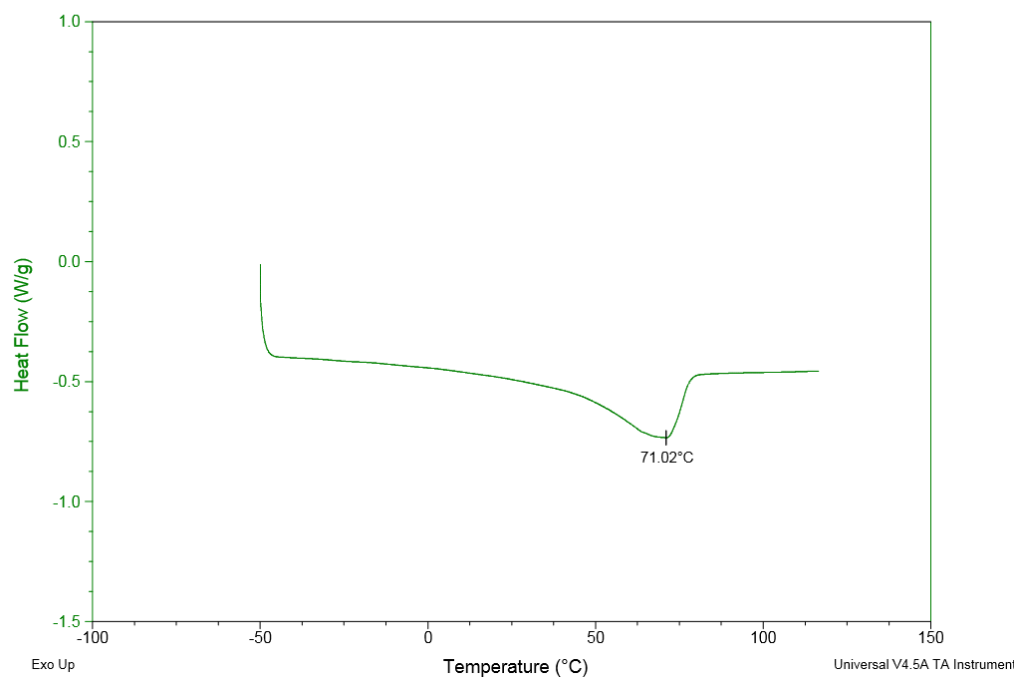

**Figure S60.** DSC of the polymer from table 1, entry 20.

# **Cirrus GPC Sample Injection Report**

Generated by: HTGPC

Saturday, April 15, 2017 10:07 AM

Workbook: E:\Cirrus Workbooks\20161130\20161130.plw

## **Sample Details**

Sample Name: DSY-Ni-H-40

Acquired: 4/14/2017 5:11:23 AM

By Analyst: HTGPC

Batch Name: DSY

Concentration: 0.10

Injection Volume: 200.0 ul K of Sample: 14.1000

Alpha of Sample:

0.7000

Analysis Using Method: PS2016113001

Calibration Used: 4/13/2017 8:58:56 AM

Calibration Type: Narrow Standard

Curve Fit Used: 1

K: 14.1000

Alpha: 0.7000

Calibration Curve:  $y = 13.063857 - 0.622521x^{*1}$

High Limit MW RT: 10.23 mins

Low Limit MW RT: 16.52 mins

Flow Marker RT: 0.00 mins

FRCF: 1.0000

FRM Name:

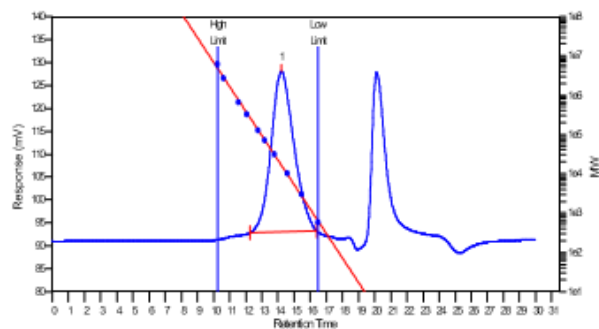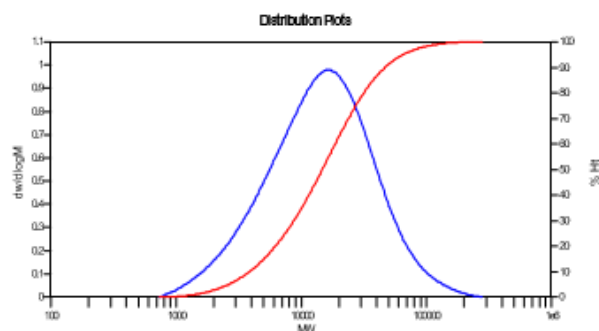

## **MW Averages**

| Peak No | Mp    | Mn   | Mw    | Mz    | Mz+1  | Mv    | PD      |
|---------|-------|------|-------|-------|-------|-------|---------|
| 1       | 16356 | 8642 | 21544 | 46731 | 84447 | 18988 | 2.49294 |

## **Processed Peaks**

| Peak No | Name | Start RT (mins) | Max RT (mins) | End RT (mins) | Pk Height (mV) | % Height | Area (mV.secs) | % Area |
|---------|------|-----------------|---------------|---------------|----------------|----------|----------------|--------|
| 1       |      | 12.23           | 14.22         | 16.38         | 35.0676        | 0        | 3453.7         | 100    |

**Figure S61.** GPC of the polymer from table 1, entry 2.



# **Cirrus GPC Sample Injection Report**

Generated by: HTGPC      Saturday, April 15, 2017 10:08 AM  
 Workbook: E:\Cirrus Workbooks\20161130\20161130.plw

## **Sample Details**

Sample Name: DSY-Ni-H-80  
 Acquired: 4/14/2017 5:44:15 AM      By Analyst: HTGPC      Batch Name: DSY  
 Concentration: 0.10      Injection Volume: 200.0 ul K of Sample: 14.1000      Alpha of Sample: 0.7000  
 Analysis Using Method: PS2016113001

Calibration Used: 4/13/2017 8:58:56 AM

Calibration Type: Narrow Standard      Curve Fit Used: 1      K: 14.1000      Alpha: 0.7000

Calibration Curve:  $y = 13.063857 - 0.622521x^4$

High Limit MW RT: 10.23 mins      Low Limit MW RT: 16.52 mins

Flow Marker RT: 0.00 mins      FRFC: 1.0000      FRM Name:

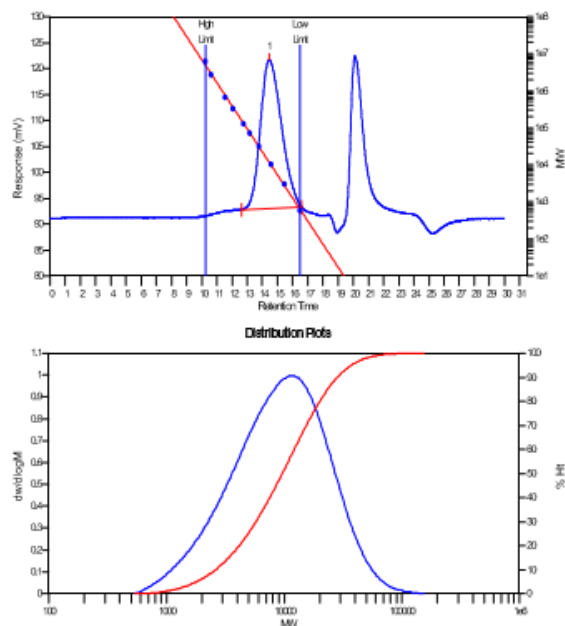

## **MW Averages**

| Peak No | Mp    | Mn   | Mw    | Mz    | Mz+1  | Mv    | PD     |
|---------|-------|------|-------|-------|-------|-------|--------|
| 1       | 11430 | 5793 | 13131 | 24782 | 40313 | 11794 | 2.2667 |

## **Processed Peaks**

| Peak No | Name | Start RT (mins) | Max RT (mins) | End RT (mins) | Pk Height (mV) | % Height | Area (mV.secs) | % Area |
|---------|------|-----------------|---------------|---------------|----------------|----------|----------------|--------|
| 1       |      | 12.65           | 14.47         | 16.60         | 28.6611        | 0        | 2768.64        | 100    |

**Figure S62.** GPC of the polymer from table 1, entry 3.

# **Cirrus GPC Sample Injection Report**

Generated by: HTGPC      Saturday, April 15, 2017 10:08 AM  
 Workbook: E:\Cirrus Workbooks\20161130\20161130.plw

## **Sample Details**

Sample Name: DSY-Ni-H-80  
 Acquired: 4/14/2017 8:17:05 AM      By Analyst: HTGPC      Batch Name: DSY  
 Concentration: 0.10      Injection Volume: 200.0 uL of Sample: 14.1000      Alpha of Sample: 0.7000  
 Analysis Using Method: PS2016113001

Calibration Used: 4/13/2017 8:58:56 AM

Calibration Type: Narrow Standard      Curve Fit Used: 1      K: 14.1000      Alpha: 0.7000

Calibration Curve:  $y = 13.063857 - 0.622521x^{*1}$

High Limit MW RT: 10.23 mins

Low Limit MW RT: 16.52 mins

Flow Marker RT: 0.00 mins      FRCF: 1.0000

FRM Name:

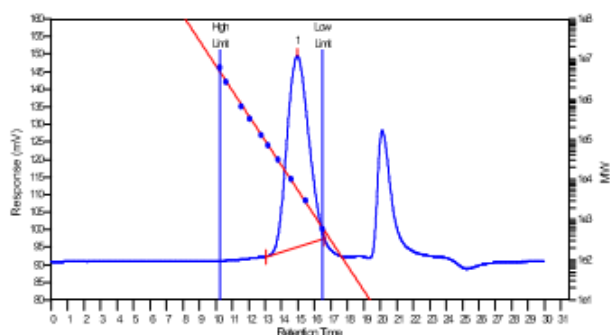

**Distribution Plots**

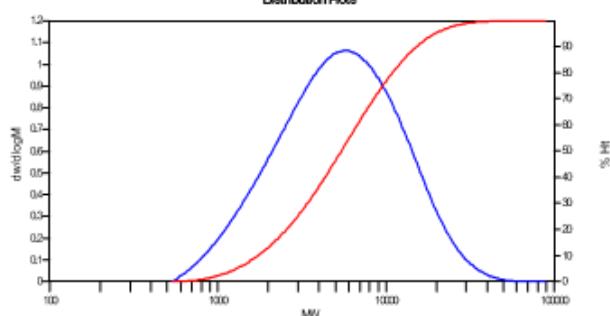

## **MW Averages**

| Peak No | Mp   | Mn   | Mw   | Mz    | Mz+1  | Mv   | PD      |
|---------|------|------|------|-------|-------|------|---------|
| 1       | 5716 | 3726 | 7174 | 12389 | 18527 | 6546 | 1.92539 |

## **Processed Peaks**

| Peak No | Name | Start RT (mins) | Max RT (mins) | End RT (mins) | Pk Height (mV) | % Height | Area (mV.secs) | % Area |
|---------|------|-----------------|---------------|---------------|----------------|----------|----------------|--------|
| 1       |      | 13.03           | 14.97         | 16.60         | 54.3393        | 0        | 4929.46        | 100    |

**Figure S63.** GPC of the polymer from table 1, entry 4.

# **Cirrus GPC Sample Injection Report**

Generated by: HTGPC  
 Saturday, April 15, 2017 10:00 AM  
 Workbook: E:\Cirrus Workbooks\20161130\20161130.plw

## **Sample Details**

Sample Name: DSY-Ni-Me-20  
 Acquired: 4/13/2017 9:57:44 PM By Analyst: HTGPC Batch Name: DSY  
 Concentration: 0.10 Injection Volume: 200.0 ul K of Sample: 14.1000 Alpha of Sample: 0.7000  
 Analysis Using Method: PS2016113001

Calibration Used: 4/13/2017 8:58:56 AM

Calibration Type: Narrow Standard Curve Fit Used: 1 K: 14.1000 Alpha: 0.7000

Calibration Curve:  $y = 13.063857 - 0.622521x^{*1}$

High Limit MW RT: 10.23 mins

Low Limit MW RT: 16.52 mins

Flow Marker RT: 0.00 mins FRCF: 1.0000

FRM Name:

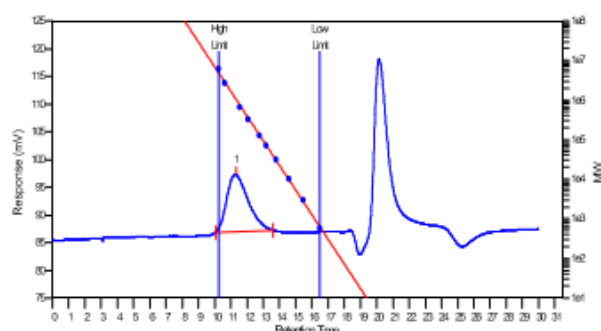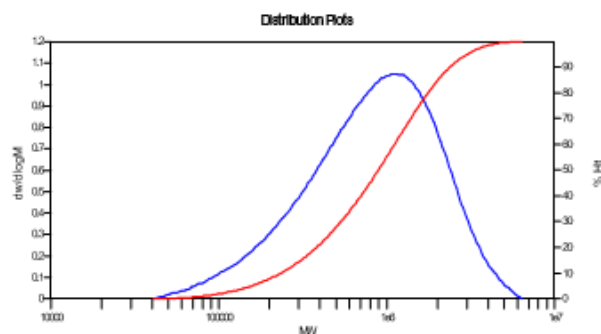

## **MW Averages**

| Peak No | Mp      | Mn     | Mw      | Mz      | Mz+1    | Mv      | PD      |
|---------|---------|--------|---------|---------|---------|---------|---------|
| 1       | 1069958 | 512407 | 1121673 | 1856639 | 2563002 | 1023360 | 2.18903 |

## **Processed Peaks**

| Peak No | Name | Start RT (mins) | Max RT (mins) | End RT (mins) | Pk Height (mV) | % Height | Area (mV.secs) | % Area |
|---------|------|-----------------|---------------|---------------|----------------|----------|----------------|--------|
| 1       |      | 10.05           | 11.30         | 13.58         | 10.3185        | 100      | 946.854        | 100    |

**Figure S64.** GPC of the polymer from table 1, entry 5.

# **Cirrus GPC Sample Injection Report**

Generated by: HTGPC

Saturday, April 15, 2017 10:00 AM

Workbook: E:\Cirrus Workbooks\20161130\20161130.plw

## **Sample Details**

Sample Name: DSY-Ni-Me-40

Acquired: 4/13/2017 10:30:35 PM

By Analyst: HTGPC

Batch Name: DSY

Concentration: 0.10

Injection Volume: 200.0  $\mu$ l K of Sample: 14.1000

Alpha of Sample:

Analysis Using Method: PS2016113001

0.7000

Calibration Used: 4/13/2017 8:58:56 AM

Calibration Type: Narrow Standard Curve Fit Used: 1

K: 14.1000

Alpha: 0.7000

Calibration Curve:  $y = 13.063857 - 0.622521x^1$

High Limit MW RT: 10.23 mins

Low Limit MW RT: 16.52 mins

Flow Marker RT: 0.00 mins

FRCF: 1.0000

FRM Name:

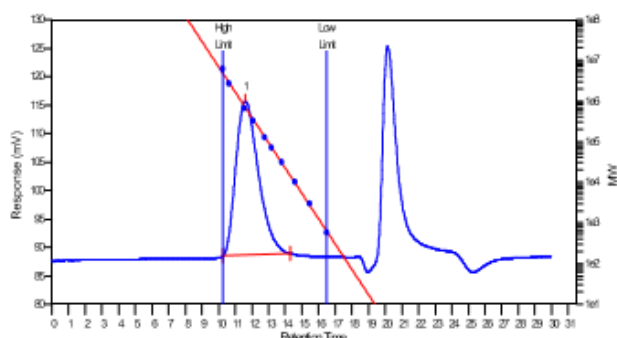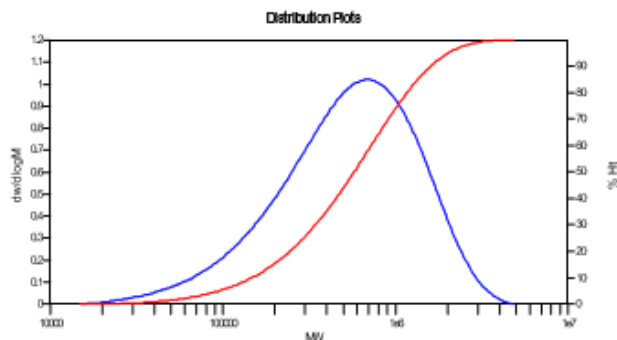

## **MW Averages**

| Peak No | Mp     | Mn     | Mw     | Mz      | Mz+1    | Mv     | PD      |
|---------|--------|--------|--------|---------|---------|--------|---------|
| 1       | 696000 | 312754 | 740033 | 1256830 | 1759568 | 671693 | 2.36618 |

## **Processed Peaks**

| Peak No | Name | Start RT (mins) | Max RT (mins) | End RT (mins) | Pk Height (mV) | % Height | Area (mV.secs) | % Area |
|---------|------|-----------------|---------------|---------------|----------------|----------|----------------|--------|
| 1       |      | 10.25           | 11.60         | 14.28         | 27.0128        | 100      | 2553.31        | 100    |

**Figure S65.** GPC of the polymer from table 1, entry 6.

# **Cirrus GPC Sample Injection Report**

Generated by: HTGPC

Saturday, April 15, 2017 10:01 AM

Workbook: E:\Cirrus Workbooks\20161130\20161130.plw

## **Sample Details**

Sample Name: DSY-Ni-Me-80

Acquired: 4/13/2017 11:05:40 PM

By Analyst: HTGPC

Batch Name: DSY

Concentration: 0.10

Injection Volume: 200.0 uL of Sample: 14.1000

Alpha of Sample:

0.7000

Analysis Using Method: PS2016113001

Calibration Used: 4/13/2017 8:58:56 AM

Calibration Type: Narrow Standard Curve Fit Used: 1

K: 14.1000

Alpha: 0.7000

Calibration Curve:  $y = 13.063857 - 0.622521x^{*1}$

High Limit MW RT: 10.23 mins

Low Limit MW RT: 16.52 mins

Flow Marker RT: 0.00 mins FRCF: 1.0000

FRM Name:

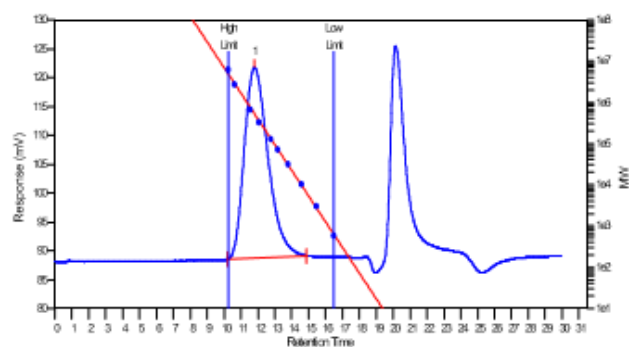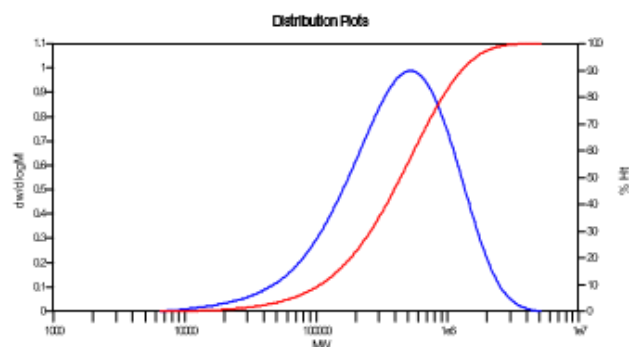

## **MW Averages**

| Peak No | Mp     | Mn     | Mw     | Mz      | Mz+1    | Mv     | PD     |
|---------|--------|--------|--------|---------|---------|--------|--------|
| 1       | 522522 | 217753 | 586910 | 1058362 | 1566417 | 527521 | 2.6953 |

## **Processed Peaks**

| Peak No | Name | Start RT (mins) | Max RT (mins) | End RT (mins) | Pk Height (mV) | % Height | Area (mV.secs) | % Area |
|---------|------|-----------------|---------------|---------------|----------------|----------|----------------|--------|
| 1       |      | 10.20           | 11.80         | 14.87         | 33.0107        | 0        | 3221.46        | 100    |

**Figure S66.** GPC of the polymer from table 1, entry 7.

# **Cirrus GPC Sample Injection Report**

Generated by: HTGPC  
 Saturday, April 15, 2017 10:01 AM  
 Workbook: E:\Cirrus Workbooks\20161130\20161130.plw

## **Sample Details**

Sample Name: DSY-Ni-Me-80  
 Acquired: 4/13/2017 11:38:30 PM By Analyst: HTGPC Batch Name: DSY  
 Concentration: 0.10 Injection Volume: 200.0 ul K of Sample: 14.1000 Alpha of Sample: 0.7000  
 Analysis Using Method: PS2016113001

## **Calibration Used: 4/13/2017 8:58:56 AM**

Calibration Type: Narrow Standard Curve Fit Used: 1 K: 14.1000 Alpha: 0.7000  
 Calibration Curve:  $y = 13.063857 - 0.622521x^{*1}$   
 High Limit MW RT: 10.23 mins Low Limit MW RT: 16.52 mins  
 Flow Marker RT: 0.00 mins FRCF: 1.0000 FRM Name:

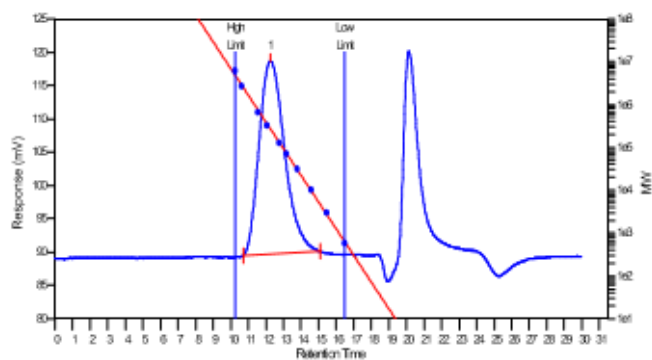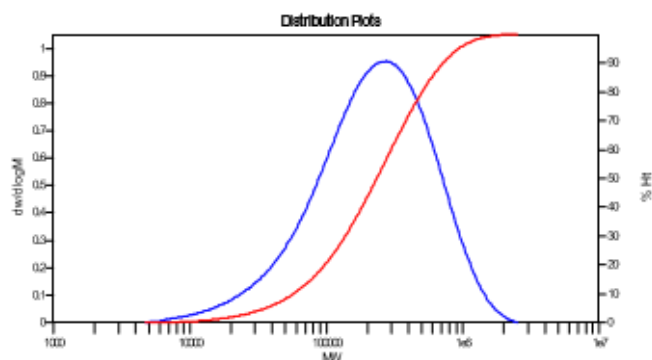

## **MW Averages**

| Peak No | Mp     | Mn     | Mw     | Mz     | Mz+1   | Mv     | PD     |
|---------|--------|--------|--------|--------|--------|--------|--------|
| 1       | 274138 | 120220 | 320759 | 591893 | 876210 | 287059 | 2.6681 |

## **Processed Peaks**

| Peak No | Name | Start RT (mins) | Max RT (mins) | End RT (mins) | Pk Height (mV) | % Height | Area (mV.secs) | % Area |
|---------|------|-----------------|---------------|---------------|----------------|----------|----------------|--------|
| 1       |      | 10.70           | 12.25         | 15.08         | 28.9733        | 0        | 2930.76        | 100    |

**Figure S67.** GPC of the polymer from table 1, entry 8.

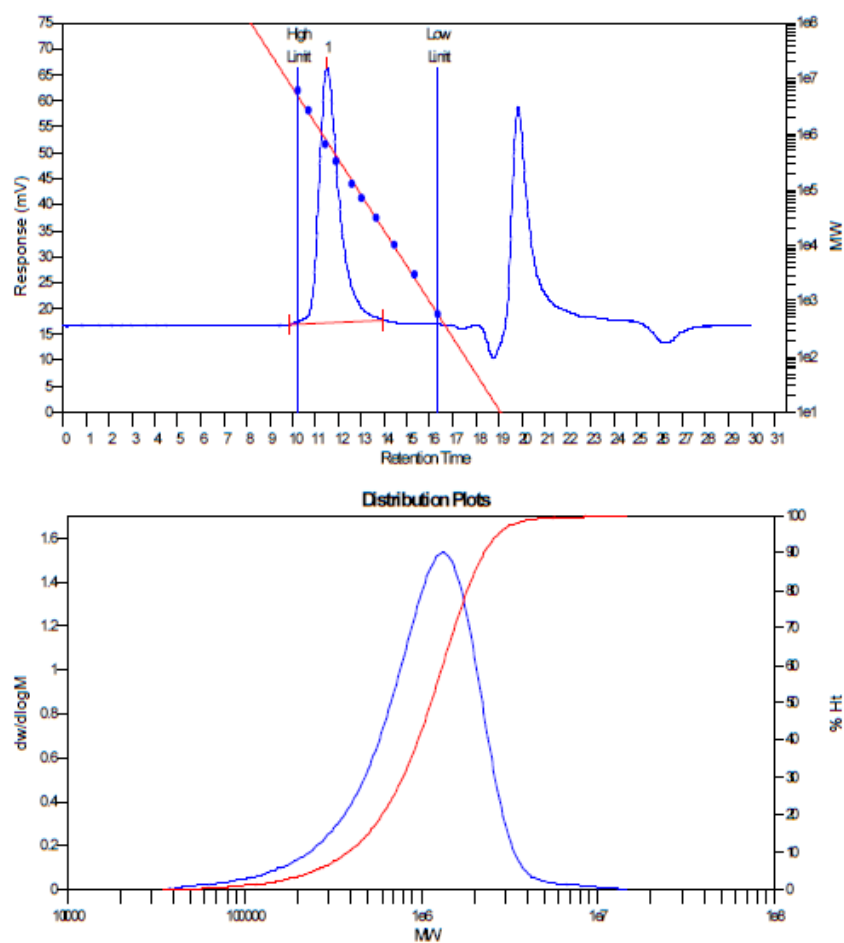

#### MW Averages

| Peak No | Mp      | Mn     | Mw      | Mz      | Mz+1    | Mv      | PD      |
|---------|---------|--------|---------|---------|---------|---------|---------|
| 1       | 1357361 | 715464 | 1280788 | 1930878 | 3100315 | 1198739 | 1.79015 |

#### Processed Peaks

| Peak No | Name | Start RT (mins) | Max RT (mins) | End RT (mins) | Pk Height (mV) | % Height | Area (mV.secs) | % Area |
|---------|------|-----------------|---------------|---------------|----------------|----------|----------------|--------|
| 1       |      | 9.90            | 11.50         | 13.97         | 48.9572        | 0        | 2966.53        | 100    |

**Figure S68.** GPC of the polymer from table 1, entry 9.

Sample Name: DSY-Ni-iPr-40  
 Acquired: 4/14/2017 12:44:10 AM By Analyst: HTGPC Batch Name: DSY  
 Concentration: 0.10 Injection Volume: 200.0 ul K of Sample: 14.1000 Alpha of Sample:  
 0.7000  
**Analysis Using Method: PS2016113001**

**Calibration Used: 4/13/2017 8:58:56 AM**

Calibration Type: Narrow Standard Curve Fit Used: 1 K: 14.1000 Alpha: 0.7000  
 Calibration Curve:  $y = 13.063857 - 0.622521x^1$   
 High Limit MW RT: 10.23 mins Low Limit MW RT: 16.52 mins  
 Flow Marker RT: 0.00 mins FRCF: 1.0000 FRM Name:

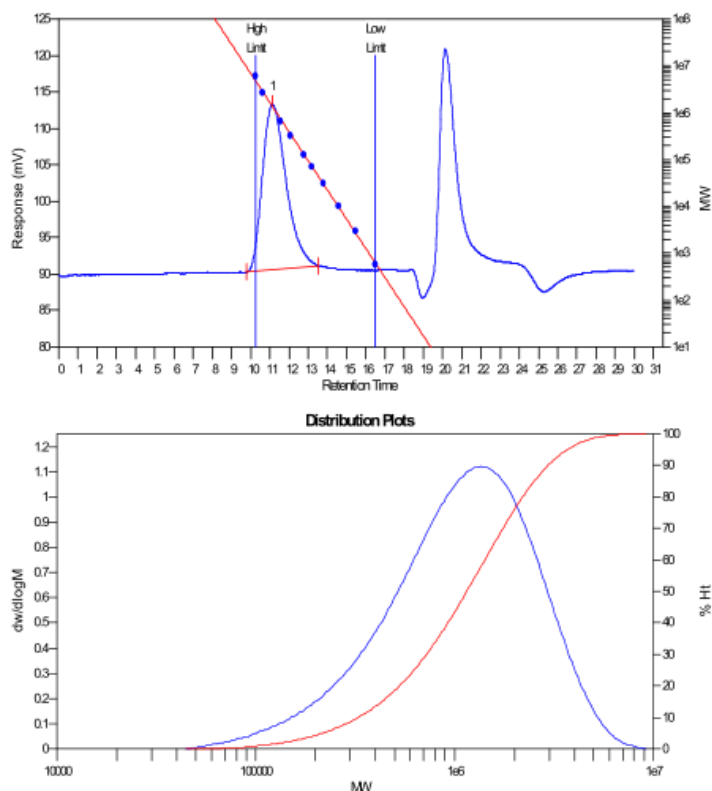

**MW Averages**

| Peak No | Mp      | Mn     | Mw      | Mz      | Mz+1    | Mv      | PD      |
|---------|---------|--------|---------|---------|---------|---------|---------|
| 1       | 1358687 | 685301 | 1425028 | 2287835 | 3148161 | 1309307 | 2.07942 |

**Processed Peaks**

| Peak No | Name | Start RT (mins) | Max RT (mins) | End RT (mins) | Pk Height (mV) | % Height | Area (mV.secs) | % Area |
|---------|------|-----------------|---------------|---------------|----------------|----------|----------------|--------|
| 1       |      | 9.80            | 11.13         | 13.52         | 22.7238        | 0        | 1953.43        | 100    |

**Figure S69.** GPC of the polymer from table 1, entry 10.



### Sample Details

Sample Name: DSY-Ni-iPr-60

Acquired: 4/14/2017 1:17:02 AM

By Analyst: HTGPC

Batch Name: DSY

Concentration: 0.10

Injection Volume: 200.0 ul K of Sample: 14.1000

Alpha of Sample:

Analysis Using Method: PS2016113001

0.7000

Calibration Used: 4/13/2017 8:58:56 AM

Calibration Type: Narrow Standard Curve Fit Used: 1

K: 14.1000

Alpha: 0.7000

Calibration Curve:  $y = 13.063857 - 0.622521x^1$

High Limit MW RT: 10.23 mins

Low Limit MW RT: 16.52 mins

Flow Marker RT: 0.00 mins

FRCF: 1.0000

FRM Name:

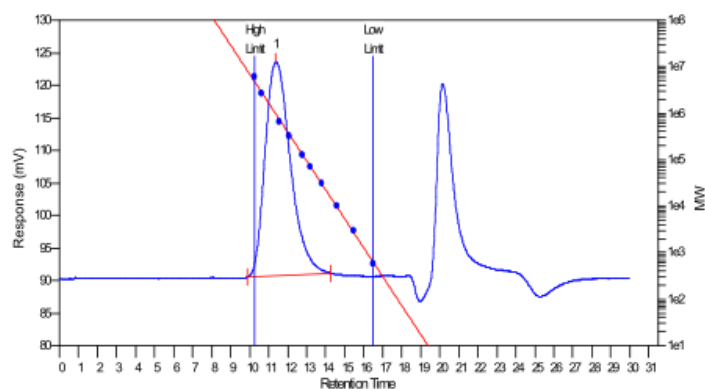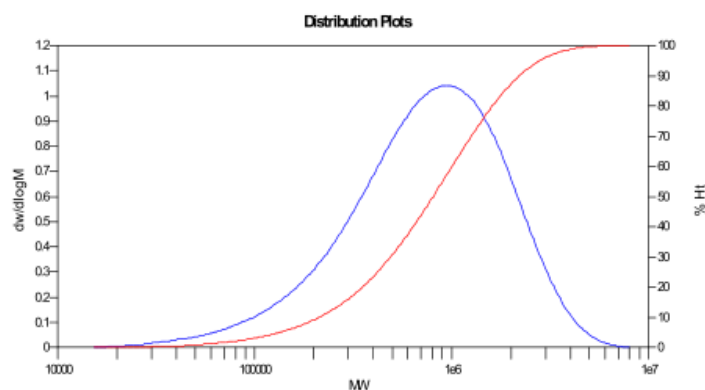

### MW Averages

| Peak No | Mp     | Mn     | Mw      | Mz      | Mz+1    | Mv     | PD      |
|---------|--------|--------|---------|---------|---------|--------|---------|
| 1       | 949487 | 434587 | 1036930 | 1768717 | 2531450 | 942013 | 2.38601 |

### Processed Peaks

| Peak No | Name | Start RT (mins) | Max RT (mins) | End RT (mins) | Pk Height (mV) | % Height | Area (mV.secs) | % Area |
|---------|------|-----------------|---------------|---------------|----------------|----------|----------------|--------|
| 1       |      | 9.90            | 11.38         | 14.27         | 32.8438        | 0        | 3042.38        | 100    |

Figure S70. GPC of the polymer from table 1, entry 11.

**Sample Details**

Sample Name: DSY-Ni-iPr-80

Acquired: 4/14/2017 1:52:05 AM

By Analyst: HTGPC

Batch Name: DSY

Concentration: 0.10

Injection Volume: 200.0 ul K of Sample: 14.1000

Alpha of Sample:

Analysis Using Method: PS2016113001

0.7000

**Calibration Used: 4/13/2017 8:58:56 AM**

Calibration Type: Narrow Standard Curve Fit Used: 1

K: 14.1000

Alpha: 0.7000

Calibration Curve:  $y = 13.063857 - 0.622521x^1$ 

High Limit MW RT: 10.23 mins

Low Limit MW RT: 16.52 mins

Flow Marker RT: 0.00 mins

FRCF: 1.0000

FRM Name:

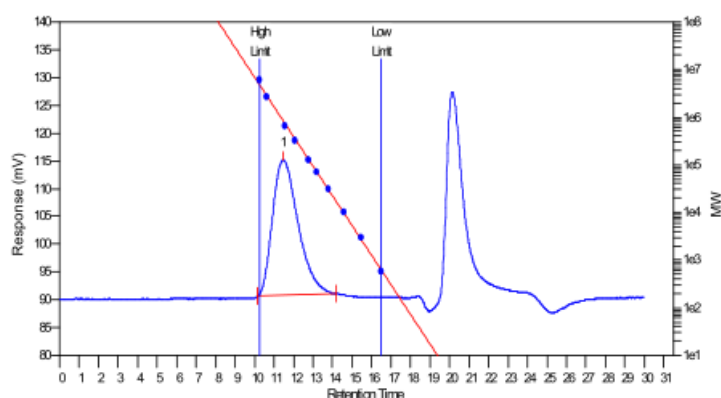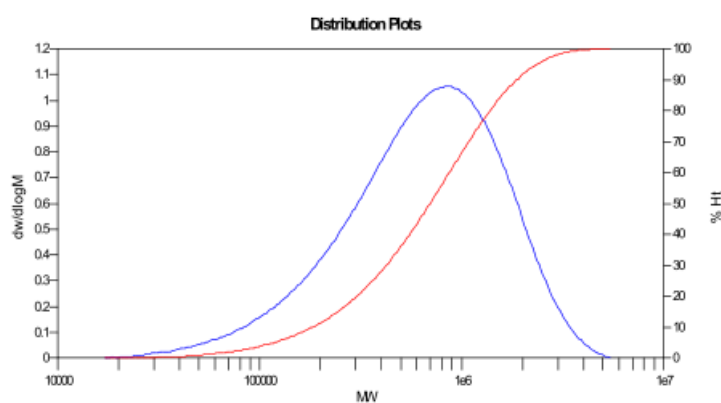**MW Averages**

| Peak No | Mp     | Mn     | Mw     | Mz      | Mz+1    | Mv     | PD      |
|---------|--------|--------|--------|---------|---------|--------|---------|
| 1       | 842582 | 384406 | 883077 | 1467951 | 2035900 | 804905 | 2.29725 |

**Processed Peaks**

| Peak No | Name | Start RT (mins) | Max RT (mins) | End RT (mins) | Pk Height (mV) | % Height | Area (mV.secs) | % Area |
|---------|------|-----------------|---------------|---------------|----------------|----------|----------------|--------|
| 1       |      | 10.17           | 11.48         | 14.18         | 24.3397        | 0        | 2228.15        | 100    |

**Figure S71.** GPC of the polymer from table 1, entry 12.

## Cirrus GPC Sample Injection Report

Generated by: HTGPC

Saturday, April 15, 2017 10:08 AM

Workbook: E:\Cirrus Workbooks\20161130\20161130.plw

### Sample Details

Sample Name: DSY-Ni-MePh-80-1

Acquired: 4/14/2017 4:03:28 AM

By Analyst: HTGPC

Batch Name: DSY

Concentration: 0.10

Injection Volume: 200.0 uL of Sample: 14.1000

Alpha of Sample:

Analysis Using Method: PS2016113001

0.7000

Calibration Used: 4/13/2017 8:58:56 AM

Calibration Type: Narrow Standard Curve Fit Used: 1

K: 14.1000

Alpha: 0.7000

Calibration Curve:  $y = 13.063857 - 0.622521x^{*1}$

High Limit MW RT: 10.23 mins

Low Limit MW RT: 16.52 mins

Flow Marker RT: 0.00 mins FRCF: 1.0000

FRM Name:

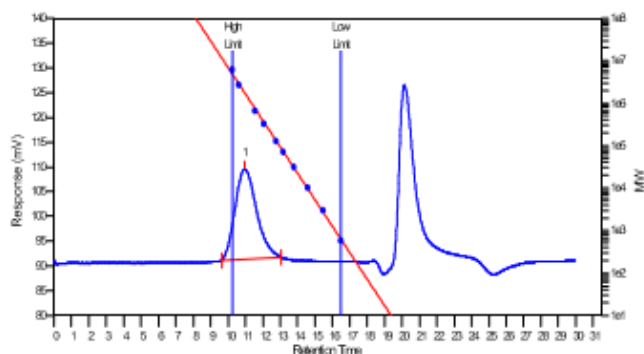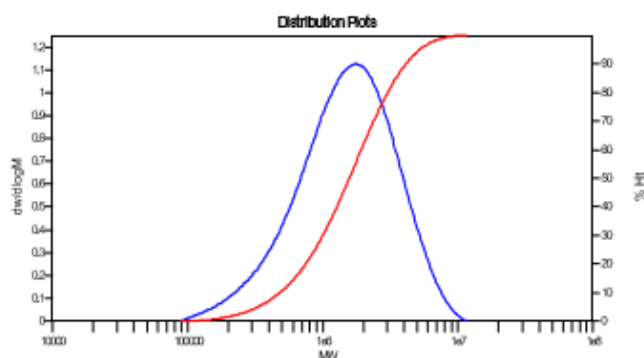

### MW Averages

| Peak No | Mp      | Mn      | Mw      | Mz      | Mz+1    | Mv      | PD      |
|---------|---------|---------|---------|---------|---------|---------|---------|
| 1       | 1767048 | 1002455 | 1975661 | 3199327 | 4452538 | 1816082 | 1.97082 |

### Processed Peaks

| Peak No | Name | Start RT (mins) | Max RT (mins) | End RT (mins) | Pk Height (mV) | % Height | Area (mV.secs) | % Area |
|---------|------|-----------------|---------------|---------------|----------------|----------|----------------|--------|
| 1       |      | 9.63            | 10.95         | 13.03         | 18.1171        | 0        | 1550.69        | 100    |

Figure S72. GPC of the polymer from table 1, entry 13.

# **Cirrus GPC Sample Injection Report**

Generated by: HTGPC

Saturday, April 15, 2017 10:05 AM

Workbook: E:\Cirrus Workbooks\20161130\20161130.plw

## **Sample Details**

Sample Name: DSY-Ni-MePh-40-1

Acquired: 4/14/2017 2:57:48 AM

By Analyst: HTGPC

Batch Name: DSY

Concentration: 0.10

Injection Volume: 200.0  $\mu$ l K of Sample: 14.1000

Alpha of Sample:

Analysis Using Method: PS2016113001

0.7000

Calibration Used: 4/13/2017 8:58:56 AM

Calibration Type: Narrow Standard

Curve Fit Used: 1

K: 14.1000

Alpha: 0.7000

Calibration Curve:  $y = 13.063857 - 0.622521x^{*1}$

High Limit MW RT: 10.23 mins

Low Limit MW RT: 16.52 mins

Flow Marker RT: 0.00 mins

FRCF: 1.0000

FRM Name:

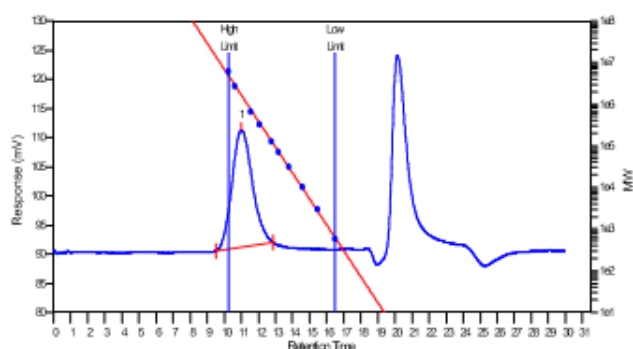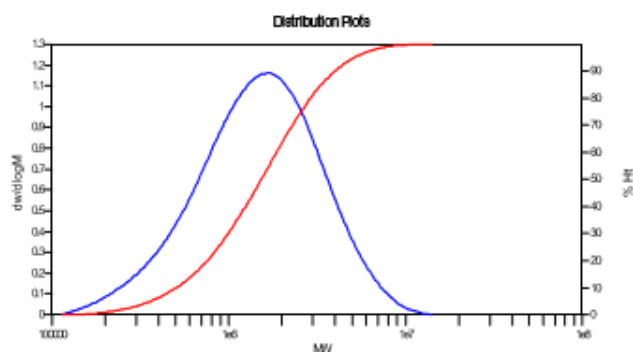

## **MW Averages**

| Peak No | Mp      | Mn      | Mw      | Mz      | Mz+1    | Mv      | PD      |
|---------|---------|---------|---------|---------|---------|---------|---------|
| 1       | 1644835 | 1037576 | 1934645 | 3177555 | 4612495 | 1780440 | 1.86458 |

## **Processed Peaks**

| Peak No | Name | Start RT (mins) | Max RT (mins) | End RT (mins) | Pk Height (mV) | % Height | Area (mV.secs) | % Area |
|---------|------|-----------------|---------------|---------------|----------------|----------|----------------|--------|
| 1       |      | 9.50            | 11.00         | 12.87         | 20.1195        | 0        | 1670.05        | 100    |

**Figure S73.** GPC of the polymer from table 1, entry 14.

# **Cirrus GPC Sample Injection Report**

Generated by: HTGPC

Saturday, April 15, 2017 10:08 AM

Workbook: E:\Cirrus Workbooks\20161130\20161130.plw

## **Sample Details**

Sample Name: DSY-Ni-MePh-80

Acquired: 4/14/2017 3:30:38 AM

By Analyst: HTGPC

Batch Name: DSY

Concentration: 0.10

Injection Volume: 200.0 ul K of Sample: 14.1000

Alpha of Sample:

Analysis Using Method: PS2016113001

0.7000

Calibration Used: 4/13/2017 8:58:56 AM

Calibration Type: Narrow Standard Curve Fit Used: 1

K: 14.1000

Alpha: 0.7000

Calibration Curve:  $y = 13.063857 - 0.622521x^{0.7}$

High Limit MW RT: 10.23 mins

Low Limit MW RT: 16.52 mins

Flow Marker RT: 0.00 mins FRCF: 1.0000

FRM Name:

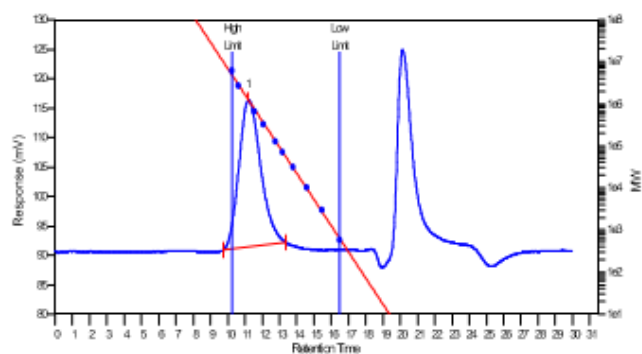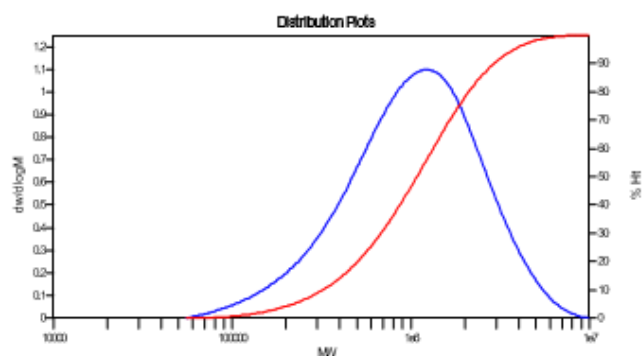

## **MW Averages**

| Peak No | Mp      | Mn     | Mw      | Mz      | Mz+1    | Mv      | PD      |
|---------|---------|--------|---------|---------|---------|---------|---------|
| 1       | 1234861 | 675475 | 1387605 | 2344878 | 3399596 | 1267490 | 2.05427 |

## **Processed Peaks**

| Peak No | Name | Start RT (mins) | Max RT (mins) | End RT (mins) | Pk Height (mV) | % Height | Area (mV.secs) | % Area |
|---------|------|-----------------|---------------|---------------|----------------|----------|----------------|--------|
| 1       |      | 9.75            | 11.20         | 13.37         | 24.9227        | 0        | 2187.08        | 100    |

**Figure S74.** GPC of the polymer from table 1, entry 15.

## Cirrus GPC Sample Injection Report

Generated by: HTGPC

Saturday, April 15, 2017 10:07 AM

Workbook: E:\Cirrus Workbooks\20161130\20161130.plw

### Sample Details

Sample Name: DSY-Ni-MePh-80

Acquired: 4/14/2017 4:38:33 AM

By Analyst: HTGPC

Batch Name: DSY

Concentration: 0.10

Injection Volume: 200.0 ul K of Sample: 14.1000

Alpha of Sample:

Analysis Using Method: P52016113001

0.7000

Calibration Used: 4/13/2017 8:58:56 AM

Calibration Type: Narrow Standard Curve Fit Used: 1

K: 14.1000

Alpha: 0.7000

Calibration Curve:  $y = 13.063857 - 0.622521x^{*1}$

High Limit MW RT: 10.23 mins

Low Limit MW RT: 16.52 mins

Flow Marker RT: 0.00 mins

FRCF: 1.0000

FRM Name:

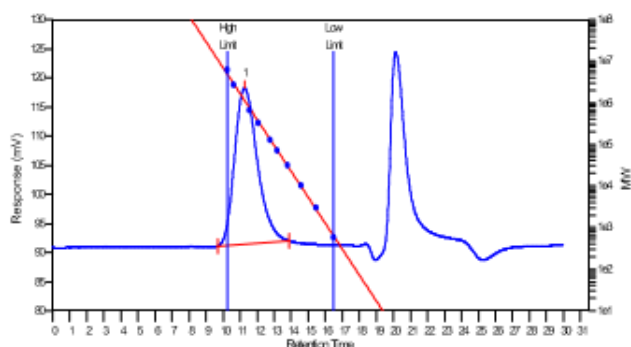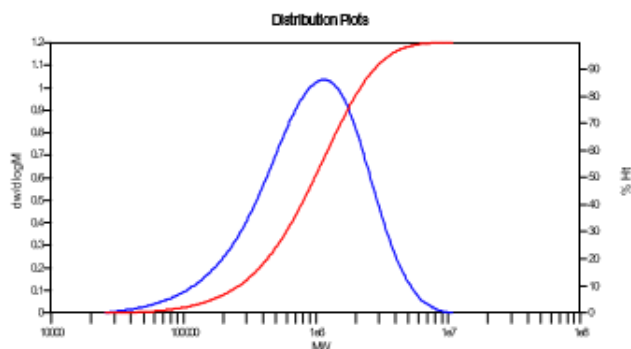

### MW Averages

| Peak No | Mp      | Mn     | Mw      | Mz      | Mz+1    | Mv      | PD      |
|---------|---------|--------|---------|---------|---------|---------|---------|
| 1       | 1177246 | 545617 | 1284471 | 2258629 | 3347101 | 1162810 | 2.35416 |

### Processed Peaks

| Peak No | Name | Start RT (mins) | Max RT (mins) | End RT (mins) | Pk Height (mV) | % Height | Area (mV.secs) | % Area |
|---------|------|-----------------|---------------|---------------|----------------|----------|----------------|--------|
| 1       |      | 9.68            | 11.27         | 13.90         | 26.8033        | 0        | 2494.6         | 100    |

Figure S75. GPC of the polymer from table 1, entry 16.

# Cirrus GPC Sample Injection Report

Generated by: HTGPC  
Workbook: E:\Cirrus Workbooks\20161130\20161130.plw

Saturday, April 15, 2017 9:35 AM

## Sample Details

Sample Name: DSY-Ni-PhPh-20

Acquired: 4/13/2017 8:19:13 PM

By Analyst: HTGPC

Batch Name: DSY

Concentration: 0.10

Injection Volume: 200.0 ul K of Sample: 14.1000

Alpha of Sample:

Analysis Using Method: PS2016113001

0.7000

Calibration Used: 4/13/2017 8:58:56 AM

Calibration Type: Narrow Standard Curve Fit Used: 1

K: 14.1000

Alpha: 0.7000

Calibration Curve:  $y = 13.063857 - 0.622521x^4$

High Limit MW RT: 10.23 mins

Low Limit MW RT: 16.52 mins

Flow Marker RT: 0.00 mins

FRCF: 1.0000

FRM Name:

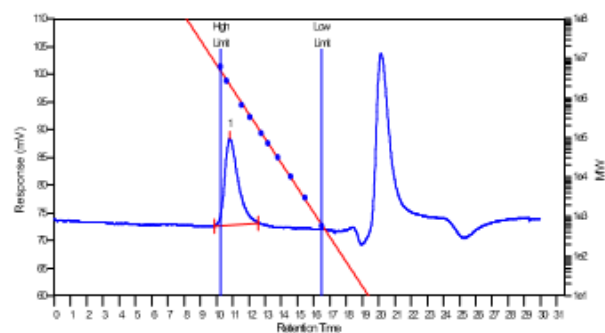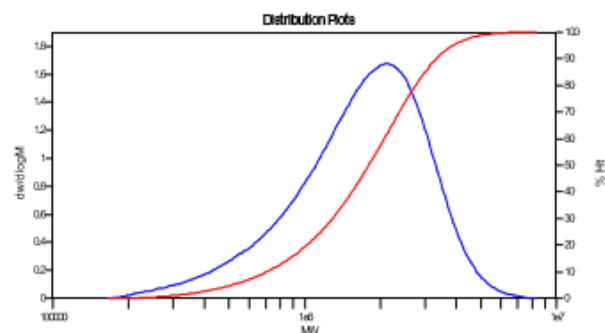

## MW Averages

| Peak No | Mp      | Mn      | Mw      | Mz      | Mz+1    | Mv      | PD      |
|---------|---------|---------|---------|---------|---------|---------|---------|
| 1       | 2139199 | 1315100 | 1914864 | 2475241 | 2994691 | 1831322 | 1.45606 |

## Processed Peaks

| Peak No | Name | Start RT (mins) | Max RT (mins) | End RT (mins) | Pk Height (mV) | % Height | Area (mV.secs) | % Area |
|---------|------|-----------------|---------------|---------------|----------------|----------|----------------|--------|
| 1       |      | 9.87            | 10.82         | 12.60         | 15.4972        | 0        | 890.571        | 100    |

Figure S76. GPC of the polymer from table 1, entry 17.

# Cirrus GPC Sample Injection Report

Generated by: HTGPC

Saturday, April 15, 2017 9:57 AM

Workbook: E:\Cirrus Workbooks\20161130\20161130.plw

## Sample Details

Sample Name: DSY-Ni-PhPh-40

Acquired: 4/13/2017 8:52:04 PM

By Analyst: HTGPC

Batch Name: DSY

Concentration: 0.10

Injection Volume: 200.0 uL of Sample: 14.1000

Alpha of Sample:

Analysis Using Method: PS2016113001

0.7000

Calibration Used: 4/13/2017 8:58:56 AM

Calibration Type: Narrow Standard Curve Fit Used: 1

K: 14.1000

Alpha: 0.7000

Calibration Curve:  $y = 13.063857 - 0.622521x^{*1}$

High Limit MW RT: 10.23 mins

Low Limit MW RT: 16.52 mins

Flow Marker RT: 0.00 mins

FRCF: 1.0000

FRM Name:

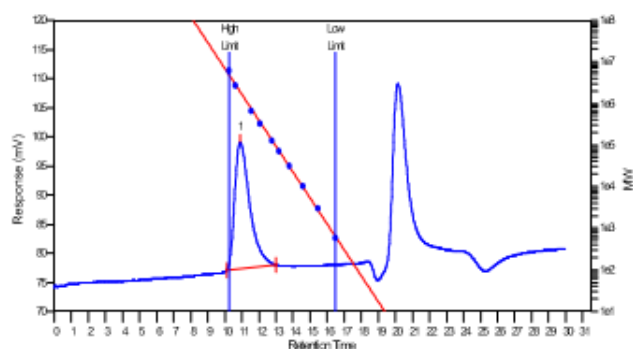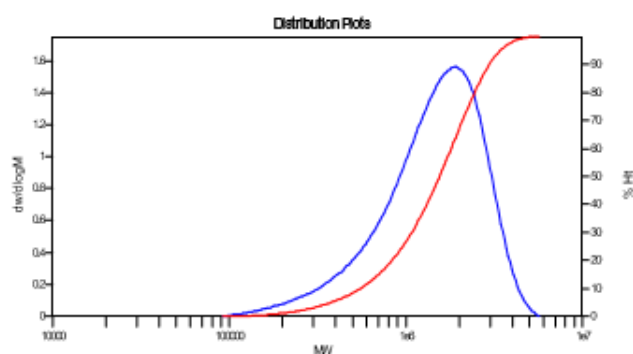

## MW Averages

| Peak No | Mp      | Mn      | Mw      | Mz      | Mz+1    | Mv      | PD      |
|---------|---------|---------|---------|---------|---------|---------|---------|
| 1       | 1898342 | 1048375 | 1652196 | 2165677 | 2588254 | 1572598 | 1.57596 |

## Processed Peaks

| Peak No | Name | Start RT (mins) | Max RT (mins) | End RT (mins) | Pk Height (mV) | % Height | Area (mV.secs) | % Area |
|---------|------|-----------------|---------------|---------------|----------------|----------|----------------|--------|
| 1       |      | 10.13           | 10.90         | 13.02         | 21.6415        | 100      | 1334.64        | 100    |

Figure S77. GPC of the polymer from table 1, entry 18.



### Cirrus GPC Sample Injection Report

Generated by: HTGPC  
Workbook: E:\Cirrus Workbooks\20161130\20161130.plw

Saturday, April 15, 2017 9:59 AM

#### Sample Details

Sample Name: DSY-Ni-PhPh-80

Acquired: 4/13/2017 9:24:54 PM

By Analyst: HTGPC

Batch Name: DSY

Concentration: 0.10

Injection Volume: 200.0 ul K of Sample: 14.1000

Alpha of Sample:

Analysis Using Method: PS2016113001

0.7000

Calibration Used: 4/13/2017 8:58:56 AM

Calibration Type: Narrow Standard Curve Fit Used: 1

K: 14.1000

Alpha: 0.7000

Calibration Curve:  $y = 13.063857 - 0.622521x^{*1}$

High Limit MW RT: 10.23 mins

Low Limit MW RT: 16.52 mins

Flow Marker RT: 0.00 mins FRCF: 1.0000

FRM Name:

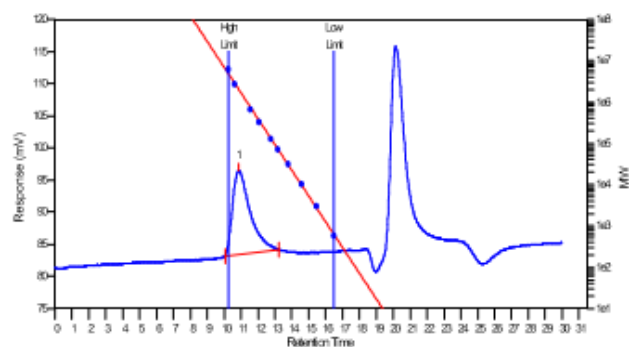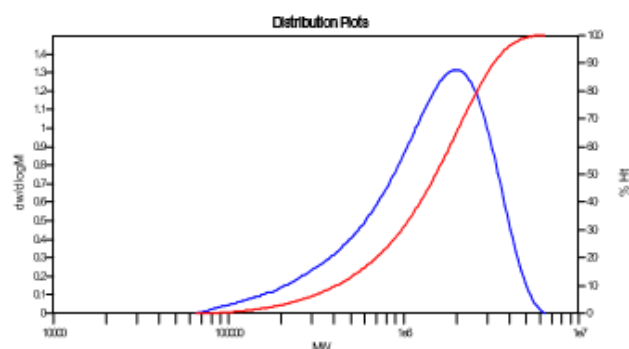

#### MW Averages

| Peak No | Mp      | Mn     | Mw      | Mz      | Mz+1    | Mv      | PD      |
|---------|---------|--------|---------|---------|---------|---------|---------|
| 1       | 2039391 | 863420 | 1685450 | 2392648 | 2939645 | 1575735 | 1.95208 |

#### Processed Peaks

| Peak No | Name | Start RT (mins) | Max RT (mins) | End RT (mins) | Pk Height (mV) | % Height | Area (mV.secs) | % Area |
|---------|------|-----------------|---------------|---------------|----------------|----------|----------------|--------|
| 1       |      | 10.05           | 10.85         | 13.25         | 12.9397        | 0        | 948.181        | 100    |

Figure S78. GPC of the polymer from table 1, entry 20.

# **Cirrus GPC Sample Injection Report**

Generated by: HTGPC      Saturday, April 15, 2017 10:09 AM  
 Workbook: E:\Cirrus Workbooks\20161130\20161130.plw

## **Sample Details**

Sample Name: DSY-Ni-PhPh-80-5min  
 Acquired: 4/14/2017 3:38:36 PM      By Analyst: HTGPC      Batch Name: DSY  
 Concentration: 0.10      Injection Volume: 200.0 ul K of Sample: 14.1000      Alpha of Sample: 0.7000  
 Analysis Using Method: PS2016113001

## **Calibration Used: 4/13/2017 8:58:56 AM**

Calibration Type: Narrow Standard      Curve Fit Used: 1      K: 14.1000      Alpha: 0.7000  
 Calibration Curve:  $y = 13.063857 - 0.622521x^{*1}$   
 High Limit MW RT: 10.23 mins      Low Limit MW RT: 16.52 mins  
 Flow Marker RT: 0.00 mins      FRCF: 1.0000      FRM Name:

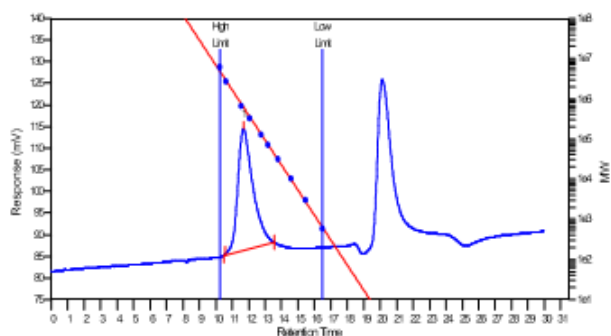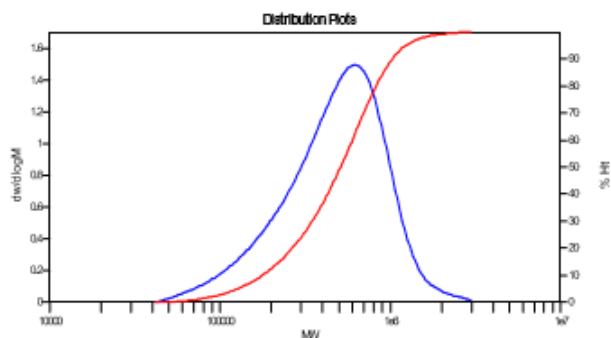

## **MW Averages**

| Peak No | Mp     | Mn     | Mw     | Mz     | Mz+1    | Mv     | PD      |
|---------|--------|--------|--------|--------|---------|--------|---------|
| 1       | 617638 | 351527 | 565684 | 797939 | 1057795 | 533752 | 1.60922 |

## **Processed Peaks**

| Peak No | Name | Start RT (mins) | Max RT (mins) | End RT (mins) | Pk Height (mV) | % Height | Area (mV.secs) | % Area |
|---------|------|-----------------|---------------|---------------|----------------|----------|----------------|--------|
| 1       |      | 10.58           | 11.70         | 13.57         | 28.1191        | 0        | 1812.39        | 100    |

**Figure S79.** GPC of the polymer from table 2, entry 1.

# **Cirrus GPC Sample Injection Report**

Generated by: HTGPC

Saturday, April 15, 2017 10:10 AM

Workbook: E:\Cirrus Workbooks\20161130\20161130.plw

## **Sample Details**

Sample Name: DSY-Ni-PhPh-80-10min

Acquired: 4/14/2017 4:11:26 PM

By Analyst: HTGPC

Batch Name: DSY

Concentration: 0.10

Injection Volume: 200.0 ul K of Sample: 14.1000

Alpha of Sample:

Analysis Using Method: PS2016113001

0.7000

Calibration Used: 4/13/2017 8:58:56 AM

Calibration Type: Narrow Standard Curve Fit Used: 1

K: 14.1000

Alpha: 0.7000

Calibration Curve:  $y = 13.063857 - 0.622521x^{*1}$

High Limit MW RT: 10.23 mins

Low Limit MW RT: 16.52 mins

Flow Marker RT: 0.00 mins

FRCF: 1.0000

FRM Name:

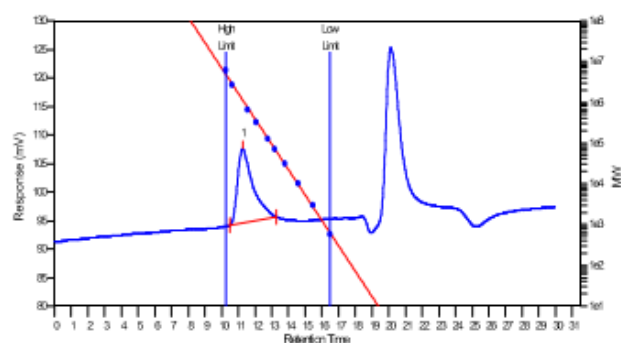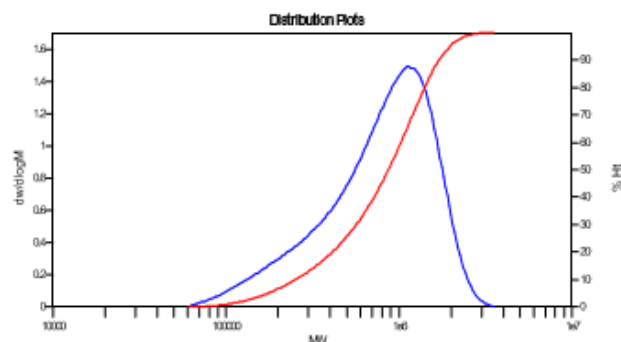

## **MW Averages**

| Peak No | Mp      | Mn     | Mw     | Mz      | Mz+1    | Mv     | PD      |
|---------|---------|--------|--------|---------|---------|--------|---------|
| 1       | 1122320 | 539756 | 923709 | 1253551 | 1509242 | 871924 | 1.71135 |

## **Processed Peaks**

| Peak No | Name | Start RT (mins) | Max RT (mins) | End RT (mins) | Pk Height (mV) | % Height | Area (mV.secs) | % Area |
|---------|------|-----------------|---------------|---------------|----------------|----------|----------------|--------|
| 1       |      | 10.47           | 11.27         | 13.30         | 13.0202        | 0        | 841.354        | 100    |

**Figure S80.** GPC of the polymer from table 2, entry 2.

# **Cirrus GPC Sample Injection Report**

Generated by: HTGPC      Saturday, April 15, 2017 10:10 AM  
 Workbook: E:\Cirrus Workbooks\20161130\20161130.plw

## **Sample Details**

Sample Name: DSY-Ni-PhPh-80-15min  
 Acquired: 4/14/2017 4:44:16 PM      By Analyst: HTGPC      Batch Name: DSY  
 Concentration: 0.10      Injection Volume: 200.0 ul K of Sample: 14.1000      Alpha of Sample: 0.7000  
 Analysis Using Method: PS2016113001

Calibration Used: 4/13/2017 8:58:56 AM

Calibration Type: Narrow Standard      Curve Fit Used: 1      K: 14.1000      Alpha: 0.7000

Calibration Curve:  $y = 13.063857 - 0.622521x^1$

High Limit MW RT: 10.23 mins

Low Limit MW RT: 16.52 mins

Flow Marker RT: 0.00 mins      FRCF: 1.0000

FRM Name:

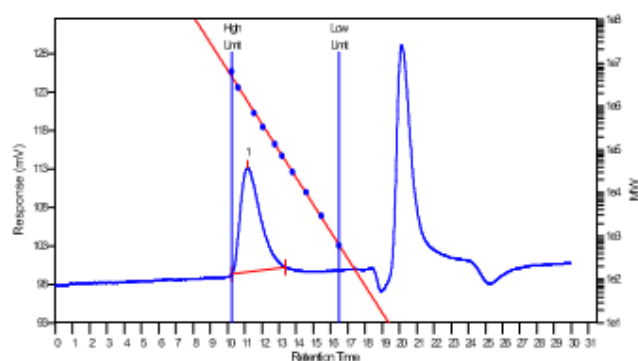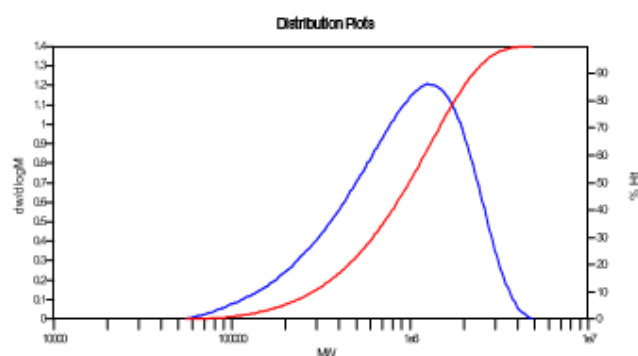

## **MW Averages**

| Peak No | Mp      | Mn     | Mw      | Mz      | Mz+1    | Mv      | PD      |
|---------|---------|--------|---------|---------|---------|---------|---------|
| 1       | 1264717 | 803268 | 1134484 | 1659749 | 2094108 | 1056916 | 1.88056 |

## **Processed Peaks**

| Peak No | Name | Start RT (mins) | Max RT (mins) | End RT (mins) | Pk Height (mV) | % Height | Area (mV.secs) | % Area |
|---------|------|-----------------|---------------|---------------|----------------|----------|----------------|--------|
| 1       |      | 10.25           | 11.18         | 13.37         | 13.549         | 0        | 1082.06        | 100    |

**Figure S81.** GPC of the polymer from table 2, entry 3.

# **Cirrus GPC Sample Injection Report**

Generated by: HTGPC

Saturday, April 15, 2017 10:11 AM

Workbook: E:\Cirrus Workbooks\20161130\20161130.plw

## **Sample Details**

Sample Name: DSY-Ni-PhPh-80-60min

Acquired: 4/14/2017 5:18:09 PM

By Analyst: HTGPC

Batch Name: DSY

Concentration: 0.10

Injection Volume: 200.0 ul K of Sample: 14.1000

Alpha of Sample:

Analysis Using Method: PS2016113001

0.7000

Calibration Used: 4/13/2017 8:58:56 AM

Calibration Type: Narrow Standard Curve Fit Used: 1

K: 14.1000

Alpha: 0.7000

Calibration Curve:  $y = 13.063857 - 0.622521x^1$

High Limit MW RT: 10.23 mins

Low Limit MW RT: 16.52 mins

Flow Marker RT: 0.00 mins

FRCF: 1.0000

FRM Name:

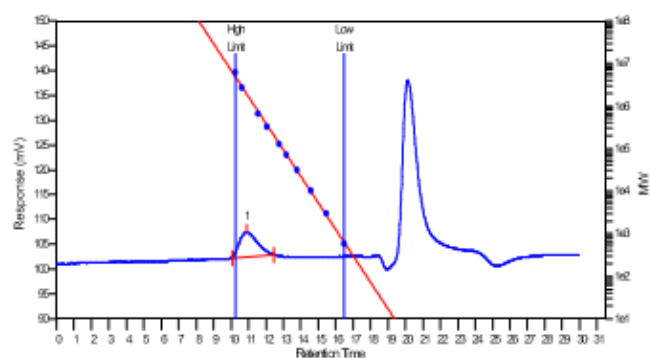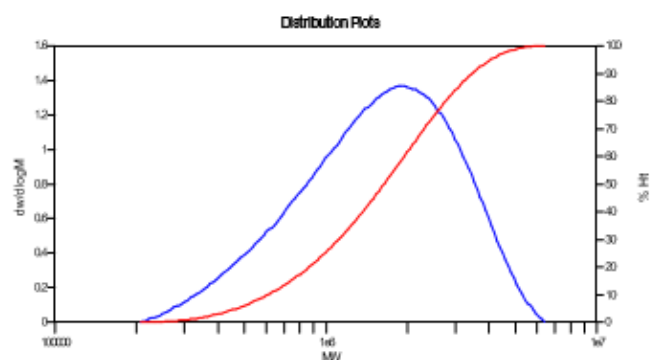

## **MW Averages**

| Peak No | Mp      | Mn      | Mw      | Mz      | Mz+1    | Mv      | PD      |
|---------|---------|---------|---------|---------|---------|---------|---------|
| 1       | 1898342 | 1209401 | 1843157 | 2506177 | 3085816 | 1746591 | 1.52402 |

## **Processed Peaks**

| Peak No | Name | Start RT (mins) | Max RT (mins) | End RT (mins) | Pk Height (mV) | % Height | Area (mV.secs) | % Area |
|---------|------|-----------------|---------------|---------------|----------------|----------|----------------|--------|
| 1       |      | 10.05           | 10.90         | 12.45         | 4.9251         | 0        | 346.379        | 100    |

**Figure S82.** GPC of the polymer from table 2, entry 5.

# **Cirrus GPC Sample Injection Report**

Generated by: HTGPC      Saturday, April 15, 2017 10:11 AM  
 Workbook: E:\Cirrus Workbooks\20161130\20161130.plw

## **Sample Details**

Sample Name: DSY-Ni-PhPh-100-5min  
 Acquired: 4/14/2017 5:53:14 PM      By Analyst: HTGPC      Batch Name: DSY  
 Concentration: 0.10      Injection Volume: 200.0 ul K of Sample: 14.1000      Alpha of Sample: 0.7000  
 Analysis Using Method: PS2016113001

Calibration Used: 4/13/2017 8:58:56 AM

Calibration Type: Narrow Standard      Curve Fit Used: 1      K: 14.1000      Alpha: 0.7000

Calibration Curve:  $y = 13.063857 - 0.622521x^{*1}$

High Limit MW RT: 10.23 mins

Low Limit MW RT: 16.52 mins

Flow Marker RT: 0.00 mins      FRCF: 1.0000

FRM Name:

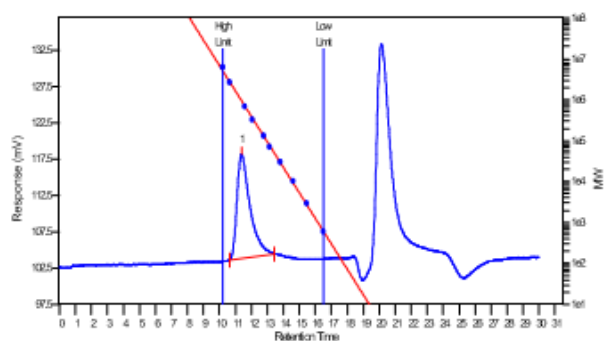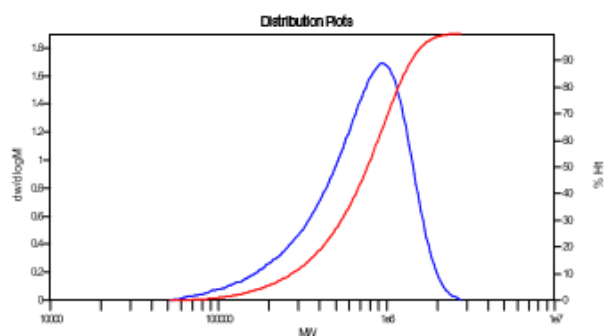

## **MW Averages**

| Peak No | Mp     | Mn     | Mw     | Mz      | Mz+1    | Mv     | PD      |
|---------|--------|--------|--------|---------|---------|--------|---------|
| 1       | 927072 | 521547 | 802183 | 1033500 | 1221075 | 765783 | 1.53808 |

## **Processed Peaks**

| Peak No | Name | Start RT (mins) | Max RT (mins) | End RT (mins) | Plk Height (mV) | % Height | Area (mV.secs) | % Area |
|---------|------|-----------------|---------------|---------------|-----------------|----------|----------------|--------|
| 1       |      | 10.63           | 11.40         | 13.42         | 14.3886         | 0        | 820.017        | 100    |

**Figure S83.** GPC of the polymer from table 2, entry 6.

# **Cirrus GPC Sample Injection Report**

Generated by: HTGPC      Saturday, April 15, 2017 10:12 AM  
 Workbook: E:\Cirrus Workbooks\20161130\20161130.plw

## **Sample Details**

Sample Name: DSY-Ni-PhPh-100-10min  
 Acquired: 4/14/2017 6:28:04 PM      By Analyst: HTGPC      Batch Name: DSY  
 Concentration: 0.10      Injection Volume: 200.0 ul K of Sample: 14.1000      Alpha of Sample: 0.7000  
 Analysis Using Method: PS2016113001

Calibration Used: 4/13/2017 8:58:56 AM

Calibration Type: Narrow Standard      Curve Fit Used: 1      K: 14.1000      Alpha: 0.7000

Calibration Curve:  $y = 13.063857 - 0.622521x^{*1}$

High Limit MW RT: 10.23 mins

Low Limit MW RT: 16.52 mins

Flow Marker RT: 0.00 mins      FRCF: 1.0000

FRM Name:

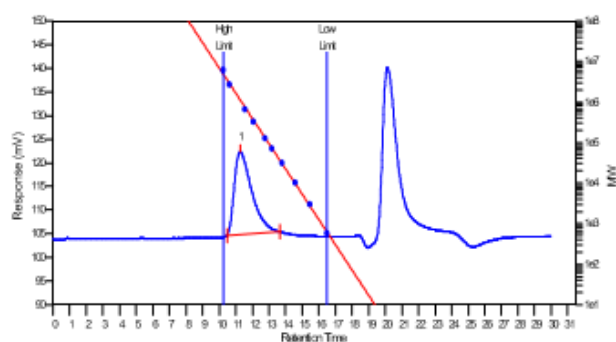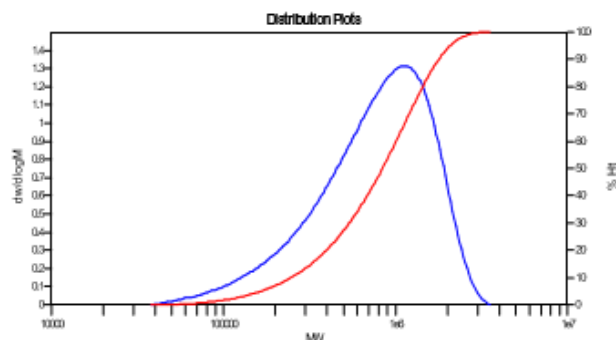

## **MW Averages**

| Peak No | Mp      | Mn     | Mw     | Mz      | Mz+1    | Mv     | PD      |
|---------|---------|--------|--------|---------|---------|--------|---------|
| 1       | 1122320 | 507762 | 928942 | 1303471 | 1598810 | 871453 | 1.82948 |

## **Processed Peaks**

| Peak No | Name | Start RT (mins) | Max RT (mins) | End RT (mins) | Pk Height (mV) | % Height | Area (mV.secs) | % Area |
|---------|------|-----------------|---------------|---------------|----------------|----------|----------------|--------|
| 1       |      | 10.47           | 11.27         | 13.63         | 17.3733        | 0        | 1274.14        | 100    |

**Figure S84.** GPC of the polymer from table 2, entry 7.

# **Cirrus GPC Sample Injection Report**

Generated by: HTGPC

Saturday, April 15, 2017 10:12 AM

Workbook: E:\Cirrus Workbooks\20161130\20161130.plw

## **Sample Details**

Sample Name: DSY-Ni-PhPh-100-15min

Acquired: 4/14/2017 8:58:54 PM

By Analyst: HTGPC

Batch Name: DSY

Concentration: 0.10

Injection Volume: 200.0 ul K of Sample: 14.1000

Alpha of Sample:

Analysis Using Method: P52016113001

0.7000

Calibration Used: 4/13/2017 8:58:56 AM

Calibration Type: Narrow Standard Curve Fit Used: 1

K: 14.1000

Alpha: 0.7000

Calibration Curve:  $y = 13.063857 - 0.622521x^{*1}$

High Limit MW RT: 10.23 mins

Low Limit MW RT: 16.52 mins

Flow Marker RT: 0.00 mins FRCF: 1.0000

FRM Name:

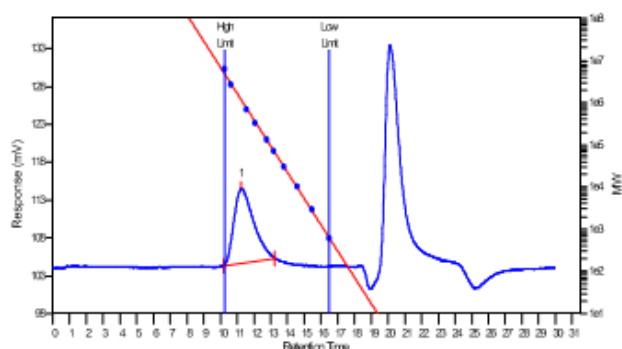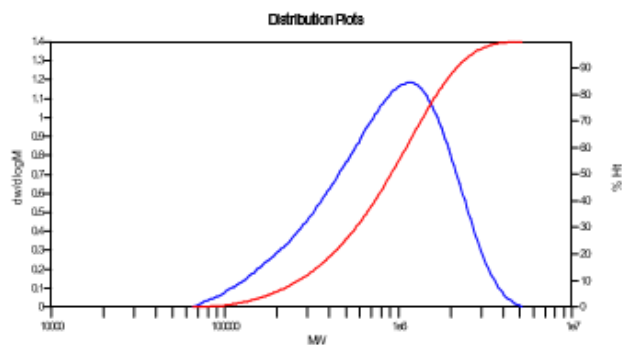

## **MW Averages**

| Peak No | Mp      | Mn     | Mw      | Mz      | Mz+1    | Mv     | PD      |
|---------|---------|--------|---------|---------|---------|--------|---------|
| 1       | 1177246 | 573046 | 1069047 | 1609004 | 2093908 | 992610 | 1.88555 |

## **Processed Peaks**

| Peak No | Name | Start RT (mins) | Max RT (mins) | End RT (mins) | Pk Height (mV) | % Height | Area (mV.secs) | % Area |
|---------|------|-----------------|---------------|---------------|----------------|----------|----------------|--------|
| 1       |      | 10.20           | 11.25         | 13.25         | 9.79539        | 0        | 796.426        | 100    |

**Figure S85.** GPC of the polymer from table 2, entry 8.



# **Cirrus GPC Sample Injection Report**

Generated by: HTGPC  
 Workbook: E:\Cirrus Workbooks\20161130\20161130.plw  
 Saturday, April 15, 2017 10:13 AM

## **Sample Details**

Sample Name: DSY-Ni-PhPh-100-60min  
 Acquired: 4/14/2017 7:31:46 PM By Analyst: HTGPC Batch Name: DSY  
 Concentration: 0.10 Injection Volume: 200.0 ul K of Sample: 14.1000 Alpha of Sample: 0.7000  
 Analysis Using Method: PS2016113001

## **Calibration Used: 4/13/2017 8:58:56 AM**

Calibration Type: Narrow Standard Curve Fit Used: 1 K: 14.1000 Alpha: 0.7000  
 Calibration Curve:  $y = 13.063857 - 0.622521x^{*1}$   
 High Limit MW RT: 10.23 mins Low Limit MW RT: 16.52 mins  
 Flow Marker RT: 0.00 mins FRCF: 1.0000 FRM Name:

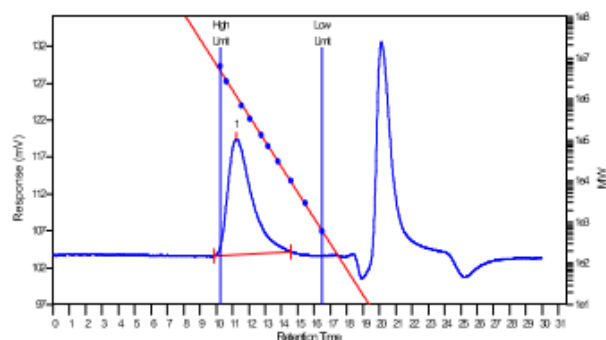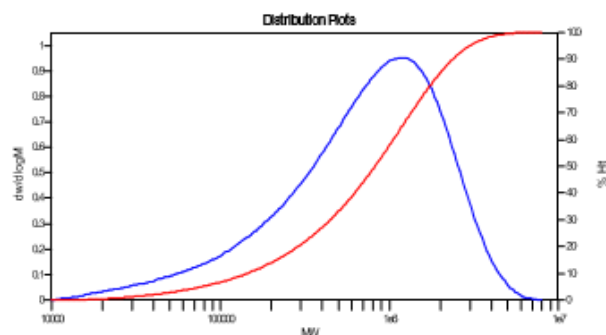

## **MW Averages**

| Peak No | Mp      | Mn     | Mw      | Mz      | Mz+1    | Mv     | PD      |
|---------|---------|--------|---------|---------|---------|--------|---------|
| 1       | 1149455 | 302847 | 1063686 | 1892053 | 2633659 | 949438 | 3.51229 |

## **Processed Peaks**

| Peak No | Name | Start RT (mins) | Max RT (mins) | End RT (mins) | Pk Height (mV) | % Height | Area (mV.secs) | % Area |
|---------|------|-----------------|---------------|---------------|----------------|----------|----------------|--------|
| 1       |      | 9.90            | 11.25         | 14.57         | 15.6703        | 0        | 1586.46        | 100    |

**Figure S86.** GPC of the polymer from table 2, entry 10.

## Cirrus GPC Sample Injection Report

Generated by: HTGPC

Saturday, June 03, 2017 10:47 AM

Workbook: E:\Cirrus Workbooks\20161130\20161130.plw

### Sample Details

Sample Name: DSY-Me-Ni-0.16UA

Acquired: 6/1/2017 4:09:58 PM

By Analyst: HTGPC

Batch Name: DSY

Concentration: 0.10

Injection Volume: 200.0 ul K of Sample: 14.1000

Alpha of Sample:

Analysis Using Method: PS2016113001

0.7000

Calibration Used: 4/13/2017 8:58:56 AM

Calibration Type: Narrow Standard Curve Fit Used: 1

K: 14.1000

Alpha: 0.7000

Calibration Curve:  $y = 13.063857 - 0.622521x^1$

High Limit MW RT: 10.23 mins

Low Limit MW RT: 16.52 mins

Flow Marker RT: 0.00 mins FRCF: 1.0000

FRM Name:

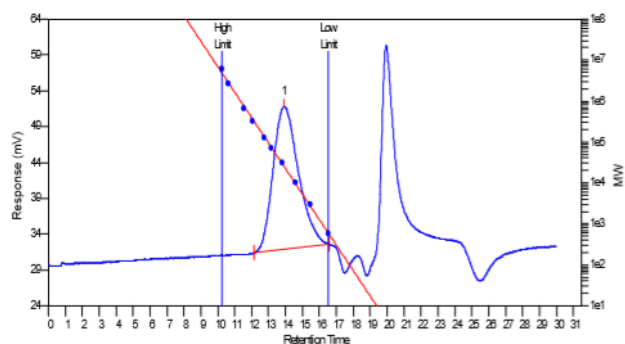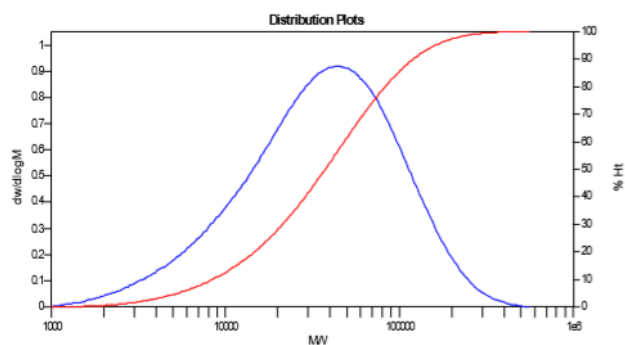

### MW Averages

| Peak No | Mp    | Mn    | Mw    | Mz     | Mz+1   | Mv    | PD      |
|---------|-------|-------|-------|--------|--------|-------|---------|
| 1       | 45792 | 18903 | 53404 | 106154 | 167724 | 47026 | 2.82516 |

### Processed Peaks

| Peak No | Name | Start RT (mins) | Max RT (mins) | End RT (mins) | Pk Height (mV) | % Height | Area (mV.secs) | % Area |
|---------|------|-----------------|---------------|---------------|----------------|----------|----------------|--------|
| 1       |      | 12.17           | 13.90         | 16.57         | 19.9483        | 0        | 2080.94        | 100    |

Figure S87. GPC of the polymer from table 3, entry 11.

# **Cirrus GPC Sample Injection Report**

Generated by: HTGPC      Saturday, June 03, 2017 10:47 AM  
 Workbook: E:\Cirrus Workbooks\20161130\20161130.plw

## **Sample Details**

Sample Name: DSY-Me-Ni-0.32UA  
 Acquired: 6/1/2017 4:42:49 PM      By Analyst: HTGPC      Batch Name: DSY  
 Concentration: 0.10      Injection Volume: 200.0 ul K of Sample: 14.1000      Alpha of Sample: 0.7000  
 Analysis Using Method: PS2016113001

## **Calibration Used: 4/13/2017 8:58:56 AM**

Calibration Type: Narrow Standard      Curve Fit Used: 1      K: 14.1000      Alpha: 0.7000  
 Calibration Curve:  $y = 13.063857 - 0.622521x^1$   
 High Limit MW RT: 10.23 mins      Low Limit MW RT: 16.52 mins  
 Flow Marker RT: 0.00 mins      FRCF: 1.0000      FRM Name:

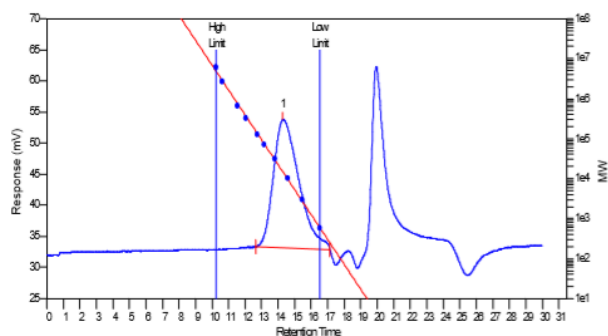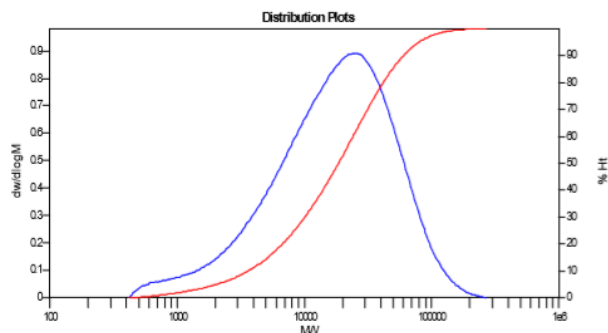

## **MW Averages**

| Peak No | Mp    | Mn   | Mw    | Mz    | Mz+1  | Mv    | PD      |
|---------|-------|------|-------|-------|-------|-------|---------|
| 1       | 24515 | 7769 | 26442 | 53152 | 83341 | 23134 | 3.40353 |

## **Processed Peaks**

| Peak No | Name | Start RT (mins) | Max RT (mins) | End RT (mins) | Pk Height (mV) | % Height | Area (mV.secs) | % Area |
|---------|------|-----------------|---------------|---------------|----------------|----------|----------------|--------|
| 1       |      | 12.67           | 14.28         | 17.15         | 20.6287        | 0        | 2217.98        | 100    |

**Figure S88.** GPC of the polymer from table 3, entry 14.

# **Cirrus GPC Sample Injection Report**

Generated by: HTGPC

Saturday, June 03, 2017 10:48 AM

Workbook: E:\Cirrus Workbooks\20161130\20161130.plw

## **Sample Details**

Sample Name: DSY-PhMe-Ni-0.32UA

Acquired: 6/1/2017 5:50:44 PM

By Analyst: HTGPC

Batch Name: DSY

Concentration: 0.10

Injection Volume: 200.0 ul K of Sample: 14.1000

Alpha of Sample:

Analysis Using Method: PS2016113001

0.7000

Calibration Used: 4/13/2017 8:58:56 AM

Calibration Type: Narrow Standard Curve Fit Used: 1

K: 14.1000

Alpha: 0.7000

Calibration Curve:  $y = 13.063857 - 0.622521x^M$

High Limit MW RT: 10.23 mins

Low Limit MW RT: 16.52 mins

Flow Marker RT: 0.00 mins

FRCF: 1.0000

FRM Name:

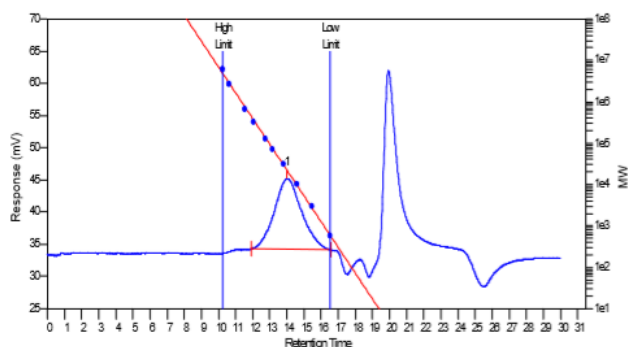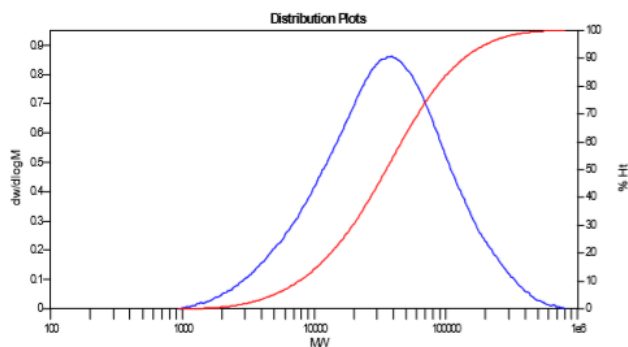

## **MW Averages**

| Peak No | Mp    | Mn    | Mw    | Mz     | Mz+1   | Mv    | PD      |
|---------|-------|-------|-------|--------|--------|-------|---------|
| 1       | 38702 | 17684 | 58582 | 146951 | 265872 | 49694 | 3.31271 |

## **Processed Peaks**

| Peak No | Name | Start RT (mins) | Max RT (mins) | End RT (mins) | Pk Height (mV) | % Height | Area (mV.secs) | % Area |
|---------|------|-----------------|---------------|---------------|----------------|----------|----------------|--------|
| 1       |      | 11.92           | 14.02         | 16.60         | 11.0171        | 0        | 1224.68        | 100    |

**Figure S89.** GPC of the polymer from table 3, entry 16.

#### 4. References

- 1, Guo, L. H.; Kong, W. Y.; Xu, Y. J.; Yang, Y. L.; Ma, R.; Cong, L.; Dai, S. Y.; Liu, Z. Large-scale synthesis of novel sterically hindered acenaphthene-based  $\alpha$ -diimine ligands and their application in coordination chemistry. *J. Organomet. Chem.* **2018**, 859, 58-67.
- 2, Cherian, A. E.; Domski, G. J.; Rose, J. M.; Lobkovsky, E. B.; Coates, G. W. Acid-catalyzed ortho-alkylation of anilines with styrenes: An improved route to chiral anilines with bulky substituents. *Org. Lett.* **2005**, 7, 5135-5137.
- 3, Guo, L. H.; Lian, K.; Kong, W.; Xu, S.; Jiang, G.; Dai, S. Y. Synthesis of Various Branched Ultra-High-Molecular-Weight Polyethylenes Using Sterically Hindered Acenaphthene-Based  $\alpha$ -Diimine Ni (II) Catalysts. *Organometallics* **2018**, 37, 2442–2449.

#### 5. X-ray Crystallography

CCDC numbers of **1**, **2** and **3** are **1886685**, **1886683** and **1886684** respectively. The data can be obtained free of charge from the Cambridge Crystallographic Data Centre via [www.ccdc.cam.ac.uk/data\\_request/cif](http://www.ccdc.cam.ac.uk/data_request/cif).

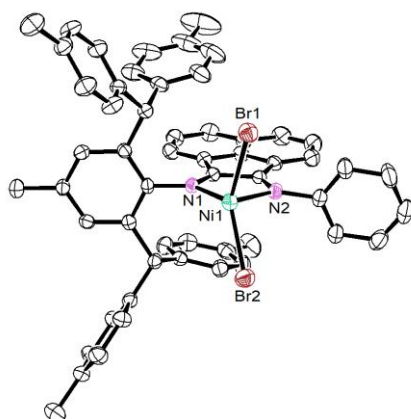

| Table S3 Crystal data and structure refinement for <b>1</b> . |                                                                                     |
|---------------------------------------------------------------|-------------------------------------------------------------------------------------|
| Identification code                                           | <b>1</b>                                                                            |
| Empirical formula                                             | C <sub>57</sub> H <sub>52</sub> Br <sub>2</sub> Cl <sub>4</sub> N <sub>2</sub> Ni O |
| Formula weight                                                | 1141.34                                                                             |
| Temperature/K                                                 | 298(2) K                                                                            |
| Crystal system                                                | Triclinic                                                                           |
| Space group                                                   | P-1                                                                                 |
| a/Å                                                           | 12.5431(11)                                                                         |
| b/Å                                                           | 14.4530(12)                                                                         |
| c/Å                                                           | 15.8001(13)                                                                         |
| $\alpha$ /°                                                   | 83.121(2)                                                                           |
| $\beta$ /°                                                    | 76.6860(10)                                                                         |
| $\gamma$ /°                                                   | 79.3150(10)                                                                         |
| Volume/Å <sup>3</sup>                                         | 2730.1(4)                                                                           |
| Z                                                             | 2                                                                                   |

|                                                |                                                                    |
|------------------------------------------------|--------------------------------------------------------------------|
| $\rho_{\text{calc}}/\text{cm}^3$               | 1.388                                                              |
| $\mu/\text{mm}^{-1}$                           | 2.054                                                              |
| F(000)                                         | 1164                                                               |
| Crystal size/ $\text{mm}^3$                    | 0.40 x 0.20 x 0.13                                                 |
| Radiation                                      | MoK $\alpha$ ( $\lambda = 0.71073$ )                               |
| 2 $\Theta$ range for data collection/ $^\circ$ | 2.36 to 25.02                                                      |
| Index ranges                                   | -14 $\leq h \leq 14$ , -17 $\leq k \leq 13$ , -18 $\leq l \leq 18$ |
| Reflections collected                          | 13979                                                              |
| Independent reflections                        | 9472 [R(int) = 0.0344]                                             |
| Data/restraints/parameters                     | 9472 / 0 / 628                                                     |
| Goodness-of-fit on $F^2$                       | 1.063                                                              |
| Final R indexes [ $I \geq 2\sigma(I)$ ]        | R1 = 0.0467, wR2 = 0.0801                                          |
| Final R indexes [all data]                     | R1 = 0.1112, wR2 = 0.0866                                          |
| Largest diff. peak/hole / $e \text{ \AA}^{-3}$ | 0.573 and -0.619                                                   |

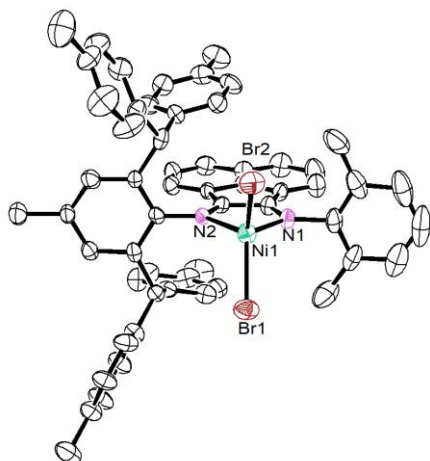

| <b>Table S4 Crystal data and structure refinement for 2.</b> |                                                                   |
|--------------------------------------------------------------|-------------------------------------------------------------------|
| Identification code                                          | <b>2</b>                                                          |
| Empirical formula                                            | C <sub>57</sub> H <sub>50</sub> Br <sub>2</sub> N <sub>2</sub> Ni |
| Formula weight                                               | 981.52                                                            |
| Temperature/K                                                | 298(2) K                                                          |
| Crystal system                                               | Monoclinic                                                        |
| Space group                                                  | P2                                                                |
| a/ $\text{\AA}$                                              | 10.813(5)                                                         |
| b/ $\text{\AA}$                                              | 20.216(5)                                                         |
| c/ $\text{\AA}$                                              | 26.480(5)                                                         |
| $\alpha/^\circ$                                              | 90.000(5)                                                         |
| $\beta/^\circ$                                               | 100.049(5)                                                        |
| $\gamma/^\circ$                                              | 90.000(5)                                                         |
| Volume/ $\text{\AA}^3$                                       | 5700(3)                                                           |

|                                                |                                                                  |
|------------------------------------------------|------------------------------------------------------------------|
| Z                                              | 4                                                                |
| $\rho_{\text{calc}}/\text{cm}^3$               | 1.144                                                            |
| $\mu/\text{mm}^{-1}$                           | 1.775                                                            |
| F(000)                                         | 2016                                                             |
| Crystal size/ $\text{mm}^3$                    | 0.30 x 0.20 x 0.20                                               |
| Radiation                                      | MoK $\alpha$ ( $\lambda$ = 0.71069)                              |
| 2 $\Theta$ range for data collection/ $^\circ$ | 2.393 to 25.707                                                  |
| Index ranges                                   | -12 $\leq h \leq$ 11, -23 $\leq k \leq$ 24, -31 $\leq l \leq$ 31 |
| Reflections collected                          | 28707                                                            |
| Independent reflections                        | 9978[R(int) = 0.1810]                                            |
| Data/restraints/parameters                     | 9978 / 0 / 566                                                   |
| Goodness-of-fit on F <sup>2</sup>              | 0.660                                                            |
| Final R indexes [ $I \geq 2\sigma(I)$ ]        | R1 = 0.0760, wR2 = 0.1632                                        |
| Final R indexes [all data]                     | R1 = 0.1932, wR2 = 0.1944                                        |
| Largest diff. peak/hole / e $\text{\AA}^{-3}$  | 0.459 and -0.358                                                 |

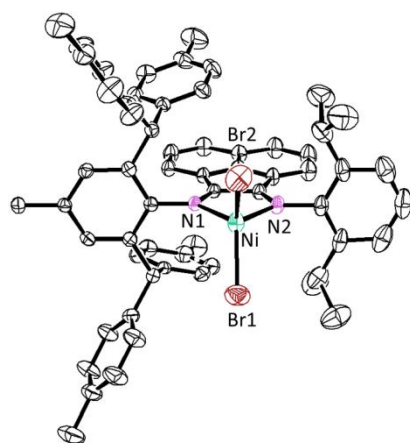

| <b>Table S5 Crystal data and structure refinement for 3.</b> |                                                                   |
|--------------------------------------------------------------|-------------------------------------------------------------------|
| Identification code                                          | <b>3</b>                                                          |
| Empirical formula                                            | C <sub>61</sub> H <sub>58</sub> Br <sub>2</sub> N <sub>2</sub> Ni |
| Formula weight                                               | 1037.62                                                           |
| Temperature/K                                                | 298(2) K                                                          |
| Crystal system                                               | Monoclinic                                                        |
| Space group                                                  | P2(1)/m                                                           |
| a/ $\text{\AA}$                                              | 11.7600(11)                                                       |
| b/ $\text{\AA}$                                              | 20.6272(18)                                                       |
| c/ $\text{\AA}$                                              | 12.0491(12)                                                       |
| $\alpha/^\circ$                                              | 90.000(5)                                                         |
| $\beta/^\circ$                                               | 106.947(2)                                                        |
| $\gamma/^\circ$                                              | 90.000(5)                                                         |
| Volume/ $\text{\AA}^3$                                       | 2795.9(5)                                                         |

|                                                |                                                                    |
|------------------------------------------------|--------------------------------------------------------------------|
| Z                                              | 2                                                                  |
| $\rho_{\text{calc}}/\text{cm}^3$               | 1.233                                                              |
| $\mu/\text{mm}^{-1}$                           | 1.813                                                              |
| F(000)                                         | 1072                                                               |
| Crystal size/ $\text{mm}^3$                    | 0.21 x 0.20 x 0.12                                                 |
| Radiation                                      | MoK $\alpha$ ( $\lambda = 0.71073$ )                               |
| 2 $\Theta$ range for data collection/ $^\circ$ | 2.35 to 25.02                                                      |
| Index ranges                                   | -13 $\leq h \leq 13$ , -21 $\leq k \leq 24$ , -14 $\leq l \leq 14$ |
| Reflections collected                          | 14293                                                              |
| Independent reflections                        | 5065[R(int) = 0.0629]                                              |
| Data/restraints/parameters                     | 9978 / 0 / 333                                                     |
| Goodness-of-fit on $F^2$                       | 1.025                                                              |
| Final R indexes [ $I \geq 2\sigma(I)$ ]        | R1 = 0.0507, wR2 = 0.0895                                          |
| Final R indexes [all data]                     | R1 = 0.1203, wR2 = 0.0976                                          |
| Largest diff. peak/hole / e $\text{\AA}^{-3}$  | 0.452 and -0.397                                                   |
